# Supplementary material for: Alkylcarbene mediated intramolecular alkene cyclopropanation to construct aza[3.1.0] bicycles
Source: Royal Society of Chemistry journal article supplement (doi:10.1039/d2qo01532c), 2022-12-06

# Alkylcarbene mediated intramolecular alkene cyclopropanation to construct aza[3.1.0] bicycles

Zhen Fu, Chengming Wang,\* and Cong-Ying Zhou \*

College of Chemistry and Materials Science, Guangdong Provincial Key Laboratory of Functional Supramolecular Coordination Materials and Applications, Jinan University, Guangzhou 510632, People's Republic of China. Email: cmwang2019@jnu.edu.cn, zhoucy2018@jnu.edu.cn

## Contents

|                                                                                                                                                                                                      |    |
|------------------------------------------------------------------------------------------------------------------------------------------------------------------------------------------------------|----|
| 1. Experimental Section.....                                                                                                                                                                         | 2  |
| 1.1 General Information.....                                                                                                                                                                         | 2  |
| 1.2 General procedure for the preparation of arenesulfonylhydrazones .....                                                                                                                           | 2  |
| 1.3 General procedure for the intramolecular alkene cyclopropanation of alkyl diazomethanes <i>in situ</i> generated from arenesulfonylhydrazones.....                                               | 3  |
| (1) General procedure for reaction condition screening .....                                                                                                                                         | 3  |
| (2) General procedure for the Rh <sub>2</sub> (esp) <sub>2</sub> -catalyzed intramolecular alkene cyclopropanation of alkyl diazomethanes <i>in situ</i> generated from arenesulfonylhydrazones..... | 3  |
| 1.4 General procedure for the one-pot Rh <sub>2</sub> (esp) <sub>2</sub> -catalyzed intramolecular alkene cyclopropanation of aldehydes .....                                                        | 3  |
| 1.5 Procedure for the synthesis of Centanafadine and Bicifadine .....                                                                                                                                | 4  |
| 1.6 General procedure for the asymmetric intramolecular cyclopropanation catalyzed by chiral dirhodium catalyst .....                                                                                | 5  |
| 2. Characterization Data of Compounds .....                                                                                                                                                          | 7  |
| 2.1 Characterization data of arenesulfonylhydrazones .....                                                                                                                                           | 7  |
| 2.2 Characterization data of products .....                                                                                                                                                          | 14 |
| 2.3 Characterization data of products centanafadine and bicifadine.....                                                                                                                              | 21 |
| 3. References .....                                                                                                                                                                                  | 22 |
| 4. NMR Spectra of Compounds.....                                                                                                                                                                     | 23 |
| NMR spectrum for arenesulfonylhydrazones .....                                                                                                                                                       | 23 |
| NMR spectrum for products .....                                                                                                                                                                      | 40 |
| NMR spectrum for centanafadine and bicifadine .....                                                                                                                                                  | 57 |
| HPLC spectra of product <b>4a</b> .....                                                                                                                                                              | 59 |

# 1. Experimental Section

## 1.1 General Information

All reactions were performed using the standard Schlenk technique under Ar atmosphere. Reagents were obtained commercially and used without further purification unless indicated otherwise. Arenesulfonylhydrazones were prepared according to the literature.<sup>[1-2]</sup> All solvents used in the reaction were dried and freshly distilled. Flash column chromatography were performed using silica gel (200-300 mesh, Branch of Qingdao Haiyang Chemical plant) and a gradient solvent system (EtOAc/n-hexane as eluent). <sup>1</sup>H and <sup>13</sup>C NMR spectra were recorded on a Bruker Avance 300 spectrometer. Chemical shifts ( $\delta$ ) were measured with tetramethylsilane (TMS) as internal reference. High Resolution Mass Spectrometry (HR-MS) data were obtained on AB SCIEX TripleTOF 5600+ mass spectrometer. Enantiomeric excess (ee) was determined using Agilent 1260 Infinity II high-performance liquid chromatography (HPLC) with a UV detector (at appropriate wavelength).

## 1.2 General procedure for the preparation of arenesulfonylhydrazones

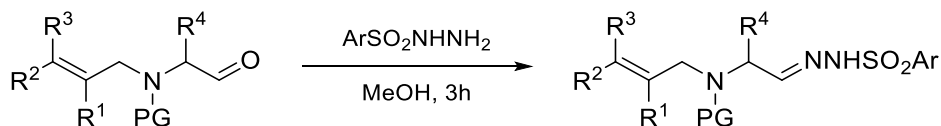

A 25 mL round-bottom flask was charged with arenesulfonyl hydrazide (1 mmol) followed by addition of 5.0 mL of MeOH. Once the solid was dissolved, the aldehyde (1 mmol) was added. After the reaction was stirred for 3h, the solvent was removed directly under reduced pressure and the residue was purified by flash column chromatography on silica gel to give the corresponding product in 80-95% yields.

## 1.3 General procedure for the intramolecular alkene cyclopropanation of alkyl diazomethanes *in situ* generated from arenesulfonylhydrazones

### (1) General procedure for reaction condition screening

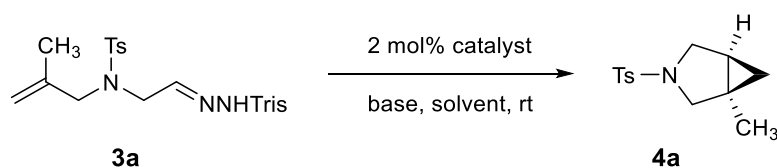

A reaction vessel was charged with 2,4,6-triisopropylbenzenesulfonylhydrazone (164 mg, 0.3 mmol), base (3 equiv.), catalyst (2 mol%) and dry solvent (3.0 mL). The mixture was stirred at room temperature until the reaction was completed. The reaction mixture was filtered, the filtrate was concentrated, and the residue was purified by silica gel column chromatography to give corresponding product.

### (2) General procedure for Rh<sub>2</sub>(esp)<sub>2</sub>-catalyzed intramolecular alkene cyclopropanation of alkyl diazomethanes *in situ* generated from arenesulfonylhydrazones

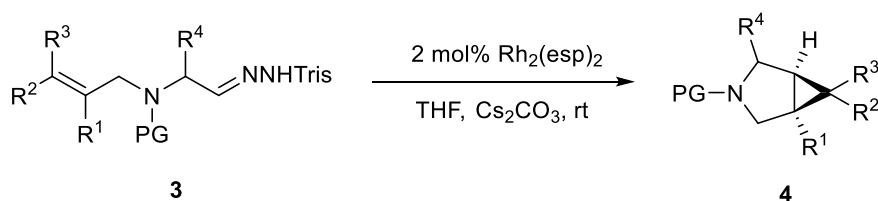

A reaction vessel was charged with substrate **3** (0.3 mmol), Cs<sub>2</sub>CO<sub>3</sub> (292 mg, 3 equiv.), Rh<sub>2</sub>(esp)<sub>2</sub> (4.55 mg, 2 mol%) and dry THF (3.0 mL). The mixture was stirred under room temperature until the reaction was completed. The reaction mixture was filtered, the filtrate was concentrated, and the residue was purified by silica gel column chromatography to give corresponding product.

### 1.4 General procedure for the one-pot Rh<sub>2</sub>(esp)<sub>2</sub>-catalyzed intramolecular alkene cyclopropanation of aldehydes

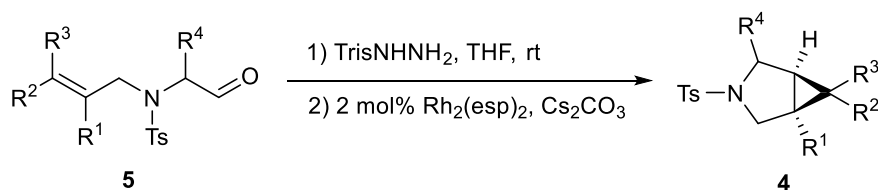



via neutral alumina column ( $\text{CH}_2\text{Cl}_2$ : MeOH = 20:1) to furnish the desired compound Centanafadine (22 mg, 91%).

### Bicifadine

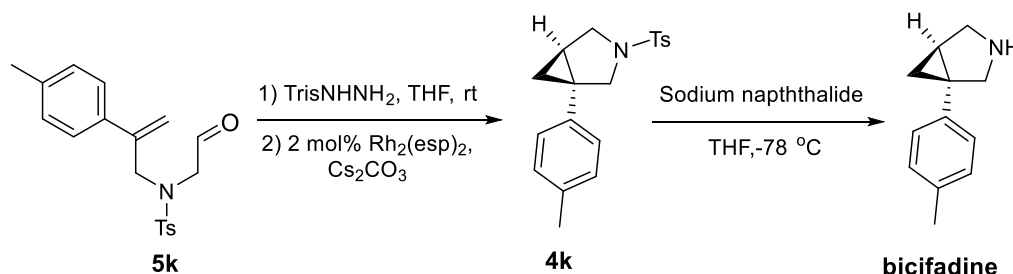

Under argon atmosphere, a solution of the aldehyde **5k** (102 mg, 0.3 mmol) and 2,4,6-triisopropylbenzenesulfonyl hydrazide (93 mg, 1.05 equiv.) in 3.0 mL of dry THF was stirred at room temperature for 3 h in a Schlenk-type tube. Cs<sub>2</sub>CO<sub>3</sub> (292 mg, 3 equiv.) and Rh<sub>2</sub>(esp)<sub>2</sub> (4.55 mg, 2 mol%) were added to the reaction mixture. The mixture was stirred at room temperature for 10h. The reaction mixture was filtered, the filtrate was concentrated, and the residue was purified by silica gel column chromatography to give products **4k** (79 mg, 81%). Compound **4k** (39 mg, 0.12 mmol) was dissolved in THF (1.0 mL) and cooled to -78 °C. Sodium naphthalide solution (~0.25 mL of a 1 M solution in DME) was added dropwise to the sulfonamide solution until a dark green color persisted. The reaction was warmed to room temperature and stirred for 5 minutes. The reaction was quenched with ethanol (until dark green color disappeared) and concentrated in vacuo. Ether and water were added (5 mL each), the layers shaken, and separated. The aqueous phase was washed twice with ether (5 mL each) and the combined organics were dried over sodium sulfate, filtered, and concentrated. Purification via neutral alumina column ( $\text{CH}_2\text{Cl}_2$ : MeOH = 20:1) to furnish the desired compound Bicifadine (18 mg, 92%).

### 1.6 General procedure for the asymmetric intramolecular cyclopropanation catalyzed by chiral dirhodium catalyst

A reaction vessel was charged with 2,4,6-triisopropylbenzenesulfonylhydrazone **3a** (164 mg, 0.3 mmol), Cs<sub>2</sub>CO<sub>3</sub> (3 equiv.), chiral dirhodium catalyst (2 mol%) and dry 1,4-dioxane (3.0 mL). The mixture was stirred at room temperature until the reaction was completed. The

reaction mixture was filtered, the filtrate was concentrated, and the residue was purified by silica gel column chromatography to give corresponding product.

**Table S1.** Asymmetric intramolecular cyclopropanation of **3a** catalyzed by chiral dirhodium catalyst

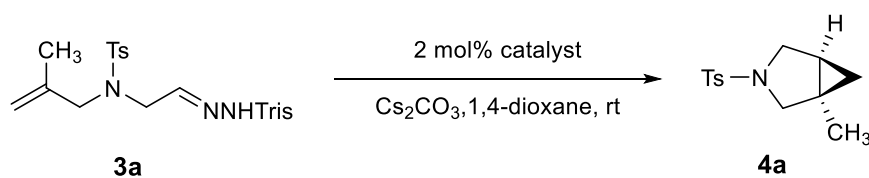

| Entry | Catalyst                                       | ee% | %Yield |
|-------|------------------------------------------------|-----|--------|
| 1     | Rh <sub>2</sub> ( <i>R</i> -DOSP) <sub>4</sub> | 42  | 61     |
| 2     | Rh <sub>2</sub> ( <i>R</i> -MPEY) <sub>4</sub> | 12  | 67     |
| 3     | Rh <sub>2</sub> ( <i>S</i> -PTTL) <sub>4</sub> | -16 | 66     |

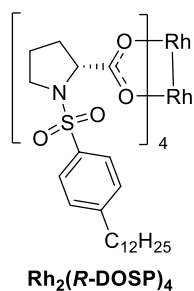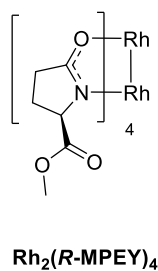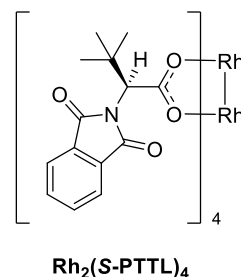

[a] Reactions were conducted with **3a** (0.3 mmol) and catalyst (2 mol%), base (0.9 mmol) in 2 mL solvent under Ar. [b] Isolated yields. [c] Determined by HPLC analysis.

## 2. Characterization Data of Compounds

### 2.1 Characterization data of arenesulfonylhydrazones

#### 4-methyl-N-(2-methylallyl)-N-(2-(2-((2,4,6-triisopropylphenyl)sulfonyl)hydrazineylidene)ethyl)benzenesulfonamide (3a)

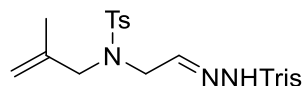

$^1\text{H}$  NMR (300 MHz, Chloroform-*d*)  $\delta$  7.76 (s, 1H), 7.61 (d,  $J$  = 8.3 Hz, 2H), 7.26 (d,  $J$  = 7.9 Hz, 2H), 7.17 (s, 2H), 6.95 (t,  $J$  = 5.4 Hz, 1H), 4.70 (d,  $J$  = 1.9 Hz, 1H), 4.53 (s, 1H), 4.13 (p,  $J$  = 6.7 Hz, 2H), 3.70 (d,  $J$  = 5.3 Hz, 2H), 3.51 (s, 2H), 2.42 (s, 3H), 1.52 (s, 3H), 1.24 (dd,  $J$  = 6.8, 1.6 Hz, 18H);  $^{13}\text{C}$  NMR (75 MHz, Chloroform-*d*)  $\delta$  153.55, 151.31, 144.10, 143.90 – 135.71 (m), 130.37 (d,  $J$  = 80.1 Hz), 127.27, 123.30 (d,  $J$  = 82.0 Hz), 115.45, 54.16, 48.19, 34.22, 29.85, 24.79, 23.55, 21.53, 19.66; HR-MS (ESI): Calcd for  $\text{C}_{28}\text{H}_{41}\text{N}_3\text{O}_4\text{S}_2\text{Na}^+$  [ $\text{M}+\text{Na}$ ] $^+$ : 570.2430; found: 570.2427.

#### N-allyl-4-methyl-N-(2-(2-((2,4,6-triisopropylphenyl)sulfonyl)hydrazineylidene)ethyl)benzenesulfonamide (3b)

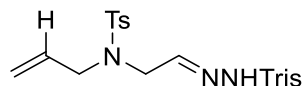

$^1\text{H}$  NMR (300 MHz, Chloroform-*d*)  $\delta$  8.81 (s, 1H), 7.64 (d,  $J$  = 8.3 Hz, 2H), 7.25 (d,  $J$  = 8.1 Hz, 2H), 7.19 (s, 2H), 7.07 (t,  $J$  = 5.4 Hz, 1H), 5.47 – 5.35 (m, 1H), 4.93 (dd,  $J$  = 10.1, 1.3 Hz, 1H), 4.80 (dd,  $J$  = 17.1, 1.5 Hz, 1H), 4.17 (td,  $J$  = 12.8, 12.1, 6.9 Hz, 2H), 3.79 (d,  $J$  = 5.5 Hz, 2H), 3.60 (d,  $J$  = 6.5 Hz, 2H), 2.91 (p,  $J$  = 7.0 Hz, 1H), 2.37 (s, 3H), 1.24 (dd,  $J$  = 6.9, 1.8 Hz, 18H);  $^{13}\text{C}$  NMR (75 MHz, Chloroform-*d*)  $\delta$  153.44, 151.30, 143.87, 143.76, 136.23, 131.53, 131.14, 129.90, 127.16, 123.80, 120.00, 50.28, 48.05, 34.19, 29.79, 24.81, 23.56, 21.46; HR-MS (ESI): Calcd for  $\text{C}_{27}\text{H}_{39}\text{N}_3\text{O}_4\text{S}_2\text{Na}^+$  [ $\text{M}+\text{Na}$ ] $^+$ : 556.2274; found: 556.2276.

#### 4-methyl-N-(3-methylbut-2-en-1-yl)-N-(2-(2-((2,4,6-triisopropylphenyl)sulfonyl)hydrazineylidene)ethyl)benzenesulfonamide (3c)

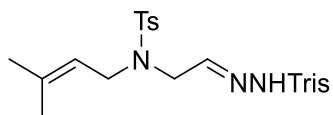

$^1\text{H}$  NMR (300 MHz, Chloroform-*d*)  $\delta$  8.52 (s, 1H), 7.64 (d,  $J = 8.3$  Hz, 2H), 7.26 (d,  $J = 8.1$  Hz, 2H), 7.18 (s, 2H), 7.09 (t,  $J = 5.3$  Hz, 1H), 4.85 (tdd,  $J = 7.3, 3.0, 1.5$  Hz, 1H), 4.18 (p,  $J = 6.7$  Hz, 2H), 3.76 (d,  $J = 5.4$  Hz, 3H), 3.66 (d,  $J = 7.3$  Hz, 2H), 2.91 (p,  $J = 6.5$  Hz, 1H), 2.39 (s, 3H), 1.55 (s, 3H), 1.34 (s, 3H), 1.29 – 1.20 (m, 18H);  $^{13}\text{C}$  NMR (75 MHz, Chloroform-*d*)  $\delta$  153.38, 151.36, 144.78, 143.55, 138.43, 136.42, 131.13, 129.78, 127.21, 123.80, 117.69, 47.93, 45.42, 34.19, 29.83, 25.69, 24.79, 23.55, 21.47, 17.55; HR-MS (ESI): Calcd for  $\text{C}_{29}\text{H}_{43}\text{N}_3\text{O}_4\text{S}_2\text{Na}^+$   $[\text{M}+\text{Na}]^+$ : 584.2587; found: 584.2590.

**4-methyl-N-(2-methylallyl)-N-(1-(2-((2,4,6-triisopropylphenyl)sulfonyl)hydrazineylidene)propan-2-yl)benzenesulfonamide (3d)**

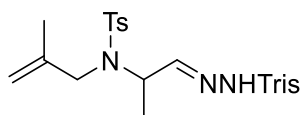

$^1\text{H}$  NMR (300 MHz, Chloroform-*d*)  $\delta$  8.48 (s, 1H), 7.65 (d,  $J = 8.3$  Hz, 2H), 7.24 (d,  $J = 8.1$  Hz, 2H), 7.18 (s, 2H), 7.03 (d,  $J = 3.5$  Hz, 1H), 4.73 – 4.63 (m, 2H), 4.51 (qd,  $J = 6.9, 3.5$  Hz, 1H), 4.14 (p,  $J = 6.7$  Hz, 2H), 3.56 (d,  $J = 2.2$  Hz, 2H), 2.91 (hept,  $J = 7.0$  Hz, 1H), 2.35 (s, 3H), 1.56 (s, 3H), 1.25 (dd,  $J = 6.9, 3.9$  Hz, 18H), 1.12 (d,  $J = 6.9$  Hz, 3H);  $^{13}\text{C}$  NMR (75 MHz, Chloroform-*d*)  $\delta$  153.43, 151.30, 147.55, 143.59, 141.18, 137.42, 131.22, 129.81, 127.11, 123.75, 114.03, 54.59, 50.42, 34.19, 29.88, 24.87, 24.84, 23.57, 23.55, 21.44, 19.78, 14.55; HR-MS (ESI): Calcd for  $\text{C}_{29}\text{H}_{43}\text{N}_3\text{O}_4\text{S}_2\text{Na}^+$   $[\text{M}+\text{Na}]^+$ : 584.2587; found: 584.2585.

**N-cinnamyl-4-methyl-N-(2-((2,4,6-triisopropylphenyl)sulfonyl)hydrazineylidene)ethyl)benzenesulfonamide (3e)**

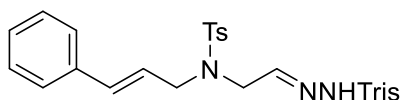

$^1\text{H}$  NMR (300 MHz, Chloroform-*d*)  $\delta$  8.44 (s, 1H), 7.70 – 7.64 (m, 2H), 7.31 – 7.25 (m, 5H), 7.23 (t,  $J = 5.0$  Hz, 2H), 7.20 (s, 2H), 7.09 (t,  $J = 5.3$  Hz, 1H), 6.33 (d,  $J = 15.8$  Hz, 1H), 5.86 (dd,  $J = 15.8, 6.8$  Hz, 1H), 4.18 (dt,  $J = 13.5, 6.7$  Hz, 2H), 3.83 (dd,  $J = 10.1, 6.1$  Hz, 4H), 3.00



– 2.84 (m, 1H), 2.41 (s, 3H), 1.26 (q,  $J = 6.8$  Hz, 18H);  $^{13}\text{C}$  NMR (75 MHz, Chloroform- $d$ )  $\delta$  153.48, 151.35, 144.03, 143.78, 136.40, 136.00, 135.03, 131.00, 129.89, 128.53, 128.01, 127.29, 126.54, 123.84, 122.54, 49.65, 47.99, 34.19, 29.86, 24.88, 24.80, 23.55, 21.50; HR-MS (ESI): Calcd for  $\text{C}_{33}\text{H}_{43}\text{N}_3\text{O}_4\text{S}_2\text{Na}^+$   $[\text{M}+\text{Na}]^+$ : 632.2587; found: 632.2585.

**N-(cyclohex-1-en-1-ylmethyl)-4-methyl-N-(2-(2-((2,4,6-triisopropylphenyl)sulfonyl)hydrazineylidene)ethyl)benzenesulfonamide (3f)**

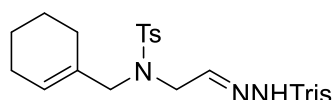

$^1\text{H}$  NMR (400 MHz, Chloroform- $d$ )  $\delta$  8.48 (s, 1H), 7.62 (d,  $J = 8.3$  Hz, 2H), 7.25 (d,  $J = 8.0$  Hz, 2H), 7.19 (s, 2H), 7.01 (t,  $J = 5.3$  Hz, 1H), 5.27 (d,  $J = 3.5$  Hz, 1H), 4.16 (p,  $J = 6.8$  Hz, 2H), 3.71 (d,  $J = 5.3$  Hz, 2H), 3.48 (s, 2H), 2.91 (p,  $J = 7.0$  Hz, 1H), 2.38 (s, 3H), 1.87 – 1.73 (m, 4H), 1.52 – 1.37 (m, 4H), 1.29 – 1.19 (m, 18H);  $^{13}\text{C}$  NMR (75 MHz, Chloroform- $d$ )  $\delta$  153.38, 151.33, 144.51, 143.58, 136.06, 131.43, 131.06, 129.78, 127.89, 127.25, 123.78, 54.62, 47.73, 34.18, 29.84, 25.89, 25.07, 24.78, 23.53, 22.28, 22.06, 21.46; HR-MS (ESI): Calcd for  $\text{C}_{31}\text{H}_{45}\text{N}_3\text{O}_4\text{S}_2\text{Na}^+$   $[\text{M}+\text{Na}]^+$ : 610.2743; found: 610.2741.

**4-methyl-N-(2-phenylallyl)-N-(2-(2-((2,4,6-triisopropylphenyl)sulfonyl)hydrazineylidene)ethyl)benzenesulfonamide (3g)**

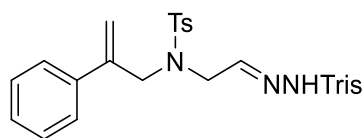

$^1\text{H}$  NMR (300 MHz, Chloroform- $d$ )  $\delta$  7.95 (s, 1H), 7.52 (d,  $J = 8.3$  Hz, 2H), 7.31 – 7.25 (m, 5H), 7.21 (d,  $J = 8.2$  Hz, 3H), 7.18 (s, 2H), 6.79 (t,  $J = 5.3$  Hz, 1H), 5.28 (s, 1H), 4.88 (d,  $J = 1.2$  Hz, 1H), 4.21 – 4.11 (m, 2H), 4.11 (s, 2H), 3.65 (d,  $J = 5.3$  Hz, 2H), 2.96 – 2.83 (m, 1H), 2.39 (s, 3H), 1.24 (dd,  $J = 6.9, 2.3$  Hz, 18H);  $^{13}\text{C}$  NMR (75 MHz, Chloroform- $d$ )  $\delta$  153.54, 151.39, 144.33, 143.79, 141.87, 137.91, 135.43, 130.98, 129.79, 128.44, 128.07, 127.42, 126.65, 123.85, 117.65, 51.85, 47.88, 34.22, 29.87, 24.82, 23.57, 21.51; HR-MS (ESI): Calcd for  $\text{C}_{33}\text{H}_{43}\text{N}_3\text{O}_4\text{S}_2\text{Na}^+$   $[\text{M}+\text{Na}]^+$ : 632.2587; found: 632.2589.

**4-methyl-N-(2-(p-tolyl)allyl)-N-(2-(2-((2,4,6-triisopropylphenyl)sulfonyl)hydrazineylidene)ethyl)benzenesulfonamide (3h)**

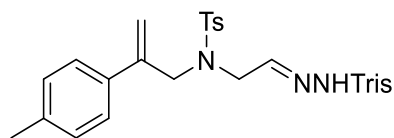

$^1\text{H}$  NMR (300 MHz, Chloroform-*d*)  $\delta$  7.55 (d,  $J = 8.3$  Hz, 2H), 7.24 (dd,  $J = 8.4, 2.7$  Hz, 4H), 7.21 (s, 2H), 7.11 (d,  $J = 8.0$  Hz, 2H), 6.80 (t,  $J = 5.3$  Hz, 1H), 5.26 (s, 1H), 4.84 (d,  $J = 1.2$  Hz, 1H), 4.18 (q,  $J = 6.7$  Hz, 2H), 4.10 (s, 2H), 3.67 (d,  $J = 5.2$  Hz, 2H), 3.03 – 2.83 (m, 1H), 2.42 (s, 3H), 2.36 (s, 3H), 1.26 (dd,  $J = 6.8, 1.8$  Hz, 18H);  $^{13}\text{C}$  NMR (75 MHz, Chloroform-*d*)  $\delta$  153.53, 151.38, 144.44, 143.76, 141.60, 137.93, 135.41, 134.93, 130.97, 129.78, 129.13, 127.42, 126.51, 123.85, 116.93, 51.98, 47.87, 34.22, 29.87, 24.82, 23.57, 21.52, 21.16; HR-MS (ESI): Calcd for  $\text{C}_{34}\text{H}_{45}\text{N}_3\text{O}_4\text{S}_2\text{Na}^+$   $[\text{M}+\text{Na}]^+$ : 646.2743; found: 646.2744.

**N-(2-(4-chlorophenyl)allyl)-4-methyl-N-(2-(2-((2,4,6-triisopropylphenyl)sulfonyl)hydrazineylidene)ethyl)benzenesulfonamide (3i)**

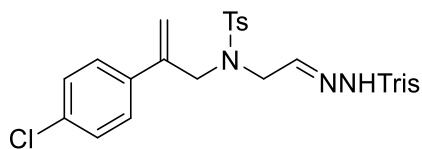

$^1\text{H}$  NMR (300 MHz, Chloroform-*d*)  $\delta$  8.12 (s, 1H), 7.54 (d,  $J = 8.3$  Hz, 2H), 7.31 – 7.21 (m, 6H), 7.21 (s, 2H), 6.82 (dd,  $J = 6.1, 4.5$  Hz, 1H), 5.29 (s, 1H), 4.90 (s, 1H), 4.19 – 4.11 (m, 2H), 4.08 (s, 2H), 3.67 (d,  $J = 5.4$  Hz, 2H), 2.93 (p,  $J = 6.9$  Hz, 1H), 2.42 (s, 3H), 1.26 (dd,  $J = 6.9, 4.1$  Hz, 18H);  $^{13}\text{C}$  NMR (75 MHz, Chloroform-*d*)  $\delta$  153.59, 151.37, 143.96, 143.86, 140.82, 136.28, 135.36, 133.96, 130.93, 129.85, 128.58, 127.99, 127.32, 123.87, 118.27, 51.80, 47.91, 34.21, 29.86, 24.82, 23.58, 21.53; HR-MS (ESI): Calcd for  $\text{C}_{33}\text{H}_{42}\text{ClN}_3\text{O}_4\text{S}_2\text{Na}^+$   $[\text{M}+\text{Na}]^+$ : 666.2197; found: 666.2185.

**Methyl-4-(3-((4-methyl-N-(2-(2-((2,4,6-triisopropylphenyl)sulfonyl)hydrazineylidene)ethyl)phenyl)sulfonamido)prop-1-en-2-yl)benzoate (3j)**

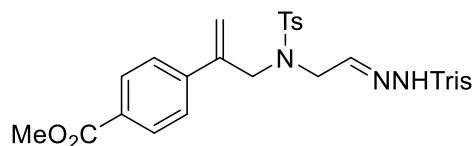

$^1\text{H}$  NMR (300 MHz, Chloroform-*d*)  $\delta$  8.43 (s, 1H), 7.91 (d,  $J = 8.4$  Hz, 2H), 7.52 (d,  $J = 8.2$  Hz, 2H), 7.35 (d,  $J = 8.4$  Hz, 2H), 7.19 (d,  $J = 8.0$  Hz, 4H), 6.86 (t,  $J = 5.3$  Hz, 1H), 5.34 (s, 1H), 4.95 (s, 1H), 4.21 – 4.09 (m, 2H), 4.11 (s, 2H), 3.90 (s, 3H), 3.67 (d,  $J = 5.3$  Hz, 2H), 2.90 (p,  $J = 6.9$  Hz, 1H), 2.36 (s, 3H), 1.23 (dd,  $J = 6.9, 4.3$  Hz, 18H);  $^{13}\text{C}$  NMR (75 MHz, Chloroform-*d*)  $\delta$  166.83, 153.53, 151.35, 143.96, 143.67, 142.49, 141.15, 135.42, 131.04, 129.85, 129.72, 129.50, 127.33, 126.61, 123.84, 119.48, 52.17, 51.53, 47.97, 34.20, 29.84, 24.82, 23.57, 21.47; HR-MS (ESI): Calcd for  $\text{C}_{35}\text{H}_{45}\text{N}_3\text{O}_6\text{S}_2\text{Na}^+$   $[\text{M}+\text{Na}]^+$ : 690.2642; found: 690.2642.

**4-methyl-N-(2-((naphthalen-2-yl)allyl)-N-(2-((2,4,6-triisopropylphenyl)sulfonyl)hydrazineylidene)ethyl)benzenesulfonamide (3k)**

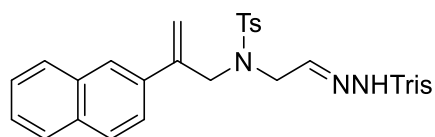

$^1\text{H}$  NMR (300 MHz, Chloroform-*d*)  $\delta$  8.11 (s, 1H), 7.85 – 7.71 (m, 5H), 7.47 (qd,  $J = 6.7, 5.4, 3.1$  Hz, 6H), 7.19 (s, 2H), 7.11 (d,  $J = 8.1$  Hz, 2H), 6.81 (t,  $J = 5.2$  Hz, 1H), 5.42 (s, 1H), 4.96 (s, 1H), 4.22 (s, 2H), 4.22 – 4.07 (m, 2H), 3.70 (d,  $J = 5.4$  Hz, 2H), 2.98 – 2.82 (m, 1H), 2.34 (s, 3H), 1.29 – 1.21 (m, 18H);  $^{13}\text{C}$  NMR (75 MHz, Chloroform-*d*)  $\delta$  153.53, 151.39, 144.21, 143.75, 141.67, 135.45, 135.18, 133.20, 133.01, 130.99, 129.74, 128.43, 128.03, 127.48, 127.32, 126.24, 125.83, 124.64, 123.86, 122.74, 118.33, 51.95, 47.92, 34.22, 29.87, 24.84, 23.58, 21.49; HR-MS (ESI): Calcd for  $\text{C}_{37}\text{H}_{45}\text{N}_3\text{O}_4\text{S}_2\text{Na}^+$   $[\text{M}+\text{Na}]^+$ : 682.2743; found: 682.2740.

**2-(((4-methyl-N-(2-((2,4,6-triisopropylphenyl)sulfonyl)hydrazineylidene)ethyl)phenyl)sulfonamido)methyl)allyl thiophene-2-carboxylate (3l)**

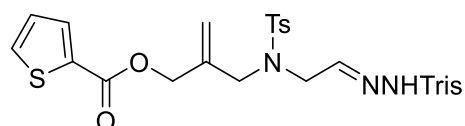

$^1\text{H}$  NMR (300 MHz, Chloroform-*d*)  $\delta$  8.65 (s, 1H), 7.82 (dd,  $J = 3.8, 1.3$  Hz, 1H), 7.64 (d,  $J = 8.3$  Hz, 2H), 7.58 (dd,  $J = 5.0, 1.3$  Hz, 1H), 7.22 (d,  $J = 8.2$  Hz, 2H), 7.19 (s, 2H), 7.12 (dd,  $J = 5.0, 3.9$  Hz, 2H), 5.12 (s, 1H), 4.81 (s, 1H), 4.59 (s, 2H), 4.17 (p,  $J = 6.7$  Hz, 2H), 3.82 (d,  $J = 5.4$  Hz, 2H), 3.73 (s, 2H), 2.92 (dq,  $J = 13.8, 6.9$  Hz, 1H), 2.35 (s, 3H), 1.24 (dd,  $J = 6.9, 2.3$  Hz, 18H);  $^{13}\text{C}$  NMR (75 MHz, Chloroform-*d*)  $\delta$  161.65, 153.47, 151.32, 144.01, 143.76, 137.24, 135.60, 133.87, 133.18, 132.81, 131.12, 129.93, 127.92, 127.25, 123.83, 118.73, 64.69, 50.41, 48.36, 34.19, 29.83, 24.84, 23.57, 21.49; HR-MS (ESI): Calcd for  $\text{C}_{33}\text{H}_{43}\text{N}_3\text{O}_6\text{S}_3\text{Na}^+$  [ $\text{M}+\text{Na}$ ] $^+$ : 696.2206; found: 696.2202.

**N-(2-(((tert-butyldimethylsilyl)oxy)methyl)allyl)-4-methyl-N-(2-(2-((2,4,6-triisopropylphenyl)sulfonyl)hydrazineylidene)ethyl)benzenesulfonamide (3m)**

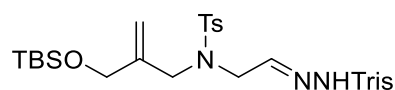

$^1\text{H}$  NMR (300 MHz, Chloroform-*d*)  $\delta$  8.72 (d,  $J = 2.8$  Hz, 1H), 7.63 (d,  $J = 8.3$  Hz, 2H), 7.24 (d,  $J = 8.2$  Hz, 2H), 7.20 (s, 2H), 6.99 (t,  $J = 5.3$  Hz, 1H), 5.07 (d,  $J = 1.8$  Hz, 1H), 4.58 (d,  $J = 1.8$  Hz, 1H), 4.17 (p,  $J = 6.6$  Hz, 2H), 3.89 (s, 2H), 3.76 (d,  $J = 5.3$  Hz, 2H), 3.61 (s, 2H), 2.91 (p,  $J = 6.9$  Hz, 1H), 2.35 (s, 3H), 1.25 (dd,  $J = 6.9, 3.2$  Hz, 18H), 0.88 (s, 9H), 0.01 (s, 6H);  $^{13}\text{C}$  NMR (75 MHz, Chloroform-*d*)  $\delta$  153.48, 151.34, 143.81, 143.56, 141.61, 135.98, 131.01, 129.89, 127.23, 123.82, 114.70, 63.33, 49.82, 47.67, 34.20, 29.82, 25.85, 24.82, 23.58, 21.44, 18.28, -5.46; HR-MS (ESI): Calcd for  $\text{C}_{34}\text{H}_{55}\text{N}_3\text{O}_5\text{S}_2\text{SiNa}^+$  [ $\text{M}+\text{Na}$ ] $^+$ : 700.3244; found: 700.3244.

**N-(2-((benzyloxy)methyl)allyl)-4-methyl-N-(2-(2-((2,4,6-triisopropylphenyl)sulfonyl)hydrazineylidene)ethyl)benzenesulfonamide (3n)**

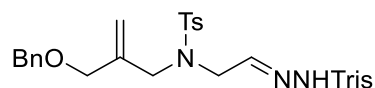

$^1\text{H}$  NMR (300 MHz, Chloroform-*d*)  $\delta$  8.80 (t,  $J = 3.8$  Hz, 1H), 7.64 (d,  $J = 8.3$  Hz, 2H), 7.38 – 7.25 (m, 5H), 7.22 (d,  $J = 8.5$  Hz, 4H), 7.01 (t,  $J = 5.3$  Hz, 1H), 5.09 (s, 1H), 4.79 (s, 1H), 4.43 (s, 2H), 4.20 (p,  $J = 6.6$  Hz, 2H), 3.84 (s, 2H), 3.77 (d,  $J = 5.4$  Hz, 2H), 3.68 (s, 2H), 2.91 (p,  $J$

= 6.9 Hz, 1H), 2.34 (s, 3H), 1.33 – 1.19 (m, 18H);  $^{13}\text{C}$  NMR (75 MHz, Chloroform-*d*)  $\delta$  153.48, 151.37, 143.85, 143.77, 139.54, 138.14, 135.77, 131.19, 129.93, 128.40, 127.75, 127.65, 127.32, 123.86, 117.29, 72.27, 70.44, 50.32, 48.40, 34.23, 29.85, 26.95, 24.88, 23.63, 21.48; HR-MS (ESI): Calcd for  $\text{C}_{35}\text{H}_{47}\text{N}_3\text{O}_5\text{S}_2\text{Na}^+$   $[\text{M}+\text{Na}]^+$ : 676.2849; found: 676.2851.

**N-(2-bromoallyl)-4-methyl-N-(2-(2-((2,4,6-triisopropylphenyl)sulfonyl)hydrazineylidene)ethyl)benzenesulfonamide (3o)**

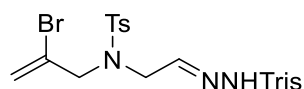

$^1\text{H}$  NMR (300 MHz, Chloroform-*d*)  $\delta$  8.50 (s, 1H), 7.69 (d,  $J$  = 8.3 Hz, 2H), 7.27 (d,  $J$  = 8.2 Hz, 2H), 7.20 (s, 2H), 7.08 (t,  $J$  = 5.4 Hz, 1H), 5.48 (d,  $J$  = 1.9 Hz, 1H), 5.39 (d,  $J$  = 2.1 Hz, 1H), 4.16 (p,  $J$  = 6.7 Hz, 2H), 3.89 (s, 2H), 3.81 (d,  $J$  = 5.4 Hz, 2H), 2.92 (p,  $J$  = 6.9 Hz, 1H), 2.40 (s, 3H), 1.26 (dd,  $J$  = 6.9, 2.6 Hz, 18H);  $^{13}\text{C}$  NMR (75 MHz, Chloroform-*d*)  $\delta$  153.59, 151.34, 144.07, 143.16, 135.96, 130.94, 129.86, 127.42, 126.92, 123.87, 120.98, 54.99, 48.20, 34.21, 29.85, 24.83, 23.57, 21.52; HR-MS (ESI): Calcd for  $\text{C}_{27}\text{H}_{38}\text{BrN}_3\text{O}_4\text{S}_2\text{Na}^+$   $[\text{M}+\text{Na}]^+$ : 612.1559; found: 612.1555.

**tert-butyl-(2-methylallyl)(2-(2-((2,4,6-triisopropylphenyl)sulfonyl)hydrazineylidene)ethyl)carbamate (3p)**

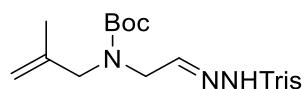

$^1\text{H}$  NMR (300 MHz, Chloroform-*d*)  $\delta$  8.50 (s, 1H), 7.16 (s, 2H), 7.13 – 7.04 (m, 1H), 4.70 (s, 1H), 4.52 (d,  $J$  = 11.1 Hz, 1H), 4.18 (p,  $J$  = 6.7 Hz, 2H), 3.80 (td,  $J$  = 12.4, 11.4, 5.9 Hz, 3H), 3.56 (d,  $J$  = 23.1 Hz, 2H), 2.88 (p,  $J$  = 6.9 Hz, 1H), 1.53 (s, 3H), 1.49 – 1.28 (m, 11H), 1.24 (dt,  $J$  = 6.9, 2.7 Hz, 18H);  $^{13}\text{C}$  NMR (75 MHz, Chloroform-*d*)  $\delta$  153.35, 151.30, 151.27, 144.88, 140.38, 131.10, 123.78, 113.23, 112.22, 80.28, 52.06, 47.45, 46.84, 34.19, 34.16, 29.82, 28.22, 24.85, 24.81, 23.56, 19.77; HR-MS (ESI): Calcd for  $\text{C}_{26}\text{H}_{43}\text{N}_3\text{O}_4\text{SNa}^+$   $[\text{M}+\text{Na}]^+$ : 516.2866; found: 516.2872.

**benzyl-(2-methylallyl)(2-(2-((2,4,6-triisopropylphenyl)sulfonyl)hydrazineylidene)ethyl)carbamate (3q)**

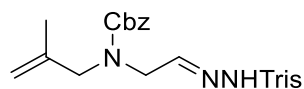

$^1\text{H}$  NMR (300 MHz, Chloroform-*d*)  $\delta$  7.33 (t,  $J = 6.9$  Hz, 5H), 7.21 (s, 2H), 7.11 (d,  $J = 25.2$  Hz, 1H), 5.11 (d,  $J = 11.4$  Hz, 2H), 4.75 (s, 1H), 4.56 (s, 1H), 4.22 (p,  $J = 6.7$  Hz, 2H), 4.00 – 3.83 (m, 2H), 3.66 (d,  $J = 7.8$  Hz, 2H), 3.00 – 2.85 (m, 1H), 1.55 (d,  $J = 7.7$  Hz, 3H), 1.27 (dd,  $J = 6.9, 1.3$  Hz, 18H);  $^{13}\text{C}$  NMR (75 MHz, Chloroform-*d*)  $\delta$  156.38, 153.36, 151.32, 144.11, 139.80, 136.32, 128.57, 128.50, 128.07, 128.02, 127.80, 123.81, 112.63, 67.63, 54.03, 52.37, 51.88, 47.39, 47.03, 34.21, 29.85, 24.83, 23.58, 19.81; HR-MS (ESI): Calcd for  $\text{C}_{29}\text{H}_{41}\text{N}_3\text{O}_4\text{SNa}^+$   $[\text{M}+\text{Na}]^+$ : 550.2710; found: 550.2713.

## 2.2 Characterization data of products

### 1-methyl-3-tosyl-3-azabicyclo[3.1.0]hexane (4a)

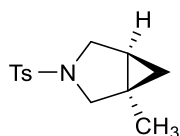

$^1\text{H}$  NMR (300 MHz, Chloroform-*d*)  $\delta$  7.69 (d,  $J = 8.2$  Hz, 2H), 7.34 (d,  $J = 8.0$  Hz, 2H), 3.49 (dd,  $J = 9.1, 3.4$  Hz, 2H), 3.10 (dd,  $J = 9.1, 3.9$  Hz, 1H), 2.84 (d,  $J = 9.0$  Hz, 1H), 2.45 (s, 3H), 1.16 (s, 3H), 1.14 – 1.08 (m, 1H), 0.56 (t,  $J = 4.5$  Hz, 1H), 0.46 (dd,  $J = 7.8, 5.0$  Hz, 1H);  $^{13}\text{C}$  NMR (75 MHz, Chloroform-*d*)  $\delta$  143.35, 133.61, 129.58, 127.55, 54.39, 50.37, 23.09, 22.19, 21.54, 18.24, 14.37; HR-MS (ESI): Calcd for  $\text{C}_{13}\text{H}_{17}\text{NO}_2\text{SNa}^+$   $[\text{M}+\text{Na}]^+$ : 274.0872; found: 274.0875.

### 3-tosyl-3-azabicyclo[3.1.0]hexane (4b)

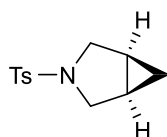

$^1\text{H}$  NMR (300 MHz, Chloroform-*d*)  $\delta$  7.67 (d,  $J = 8.3$  Hz, 2H), 7.31 (d,  $J = 8.0$  Hz, 2H), 3.50 (d,  $J = 9.1$  Hz, 2H), 3.04 (d,  $J = 9.3$  Hz, 1H), 2.42 (s, 3H), 1.39 (dddd,  $J = 7.7, 3.9, 2.4, 1.3$  Hz, 2H), 0.54 (td,  $J = 7.8, 5.1$  Hz, 1H), 0.35 (q,  $J = 4.3$  Hz, 1H).  $^{13}\text{C}$  NMR (75 MHz, Chloroform-*d*)  $\delta$  143.36, 133.60, 129.56, 127.54, 49.81, 21.51, 15.59, 7.56; HR-MS (ESI): Calcd for  $\text{C}_{12}\text{H}_{15}\text{NO}_2\text{SNa}^+$   $[\text{M}+\text{Na}]^+$ : 260.0715; found: 260.0720.

#### 6,6-dimethyl-3-tosyl-3-azabicyclo[3.1.0]hexane (4c)

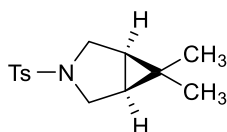

$^1\text{H}$  NMR (300 MHz, Chloroform-*d*)  $\delta$  7.69 (d,  $J = 8.2$  Hz, 2H), 7.31 (d,  $J = 8.0$  Hz, 2H), 3.39 – 3.23 (m, 4H), 2.42 (s, 3H), 1.66 (s, 1H), 1.25 (dd,  $J = 3.1, 1.5$  Hz, 2H), 0.96 (d,  $J = 1.5$  Hz, 6H).  $^{13}\text{C}$  NMR (75 MHz, Chloroform-*d*)  $\delta$  143.23, 134.07, 129.55, 127.41, 47.75, 28.09, 26.54, 21.51, 19.84, 12.65; HR-MS (ESI): Calcd for  $\text{C}_{14}\text{H}_{19}\text{NO}_2\text{SNa}^+$   $[\text{M}+\text{Na}]^+$ : 288.1028; found: 288.1032.

#### 1,4-dimethyl-3-tosyl-3-azabicyclo[3.1.0]hexane (4d)

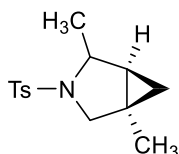

A mixture of diastereoisomers in dr = 1:1.  $^1\text{H}$  NMR (300 MHz, Chloroform-*d*)  $\delta$  7.69 (d,  $J = 3.4$  Hz, 2H), 7.66 (d,  $J = 3.4$  Hz, 2H), 7.34 (d,  $J = 8.1$  Hz, 2H), 7.30 (d,  $J = 8.0$  Hz, 2H), 3.87 (q,  $J = 6.4$  Hz, 1H), 3.55 (d,  $J = 9.0$  Hz, 1H), 3.43 (d,  $J = 10.3$  Hz, 1H), 3.37 (td,  $J = 6.0, 4.0$  Hz, 1H), 3.30 (dd,  $J = 10.3, 1.2$  Hz, 1H), 2.91 (d,  $J = 9.0$  Hz, 1H), 2.45 (s, 3H), 2.42 (s, 3H), 1.40 (d,  $J = 6.0$  Hz, 3H), 1.27 (d,  $J = 6.4$  Hz, 3H), 1.18 (s, 3H), 1.10 (s, 3H), 0.91 (dd,  $J = 7.8, 4.1$  Hz, 1H), 0.79 (t,  $J = 4.4$  Hz, 1H), 0.35 (dd,  $J = 7.9, 4.9$  Hz, 1H), 0.29 (ddd,  $J = 7.8, 5.1, 1.2$  Hz, 1H), -0.30 (t,  $J = 4.6$  Hz, 1H);  $^{13}\text{C}$  NMR (75 MHz, Chloroform-*d*)  $\delta$  143.41, 142.98, 137.33, 132.98, 129.61, 129.51, 127.84, 126.85, 59.11, 57.53, 57.18, 53.00, 30.17, 29.26, 23.21, 22.03, 21.54, 21.49, 19.96, 18.79, 18.53, 18.49, 14.41, 12.12; HR-MS (ESI): Calcd for  $\text{C}_{14}\text{H}_{19}\text{NO}_2\text{SNa}^+$   $[\text{M}+\text{Na}]^+$ : 288.1028; found: 288.1030.

### 6-phenyl-3-tosyl-3-azabicyclo[3.1.0]hexane (4e)

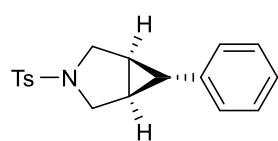

$^1\text{H}$  NMR (300 MHz, Chloroform-*d*)  $\delta$  7.72 (d,  $J = 8.3$  Hz, 2H), 7.36 (d,  $J = 8.0$  Hz, 2H), 7.27 – 7.09 (m, 3H), 6.97 – 6.91 (m, 2H), 3.71 (d,  $J = 9.5$  Hz, 2H), 3.18 (dt,  $J = 9.4, 1.7$  Hz, 2H), 2.46 (s, 3H), 1.88 (t,  $J = 3.6$  Hz, 1H), 1.76 – 1.68 (m, 2H);  $^{13}\text{C}$  NMR (75 MHz, Chloroform-*d*)  $\delta$  143.61, 140.41, 133.33, 129.70, 128.43, 127.63, 125.96, 125.65, 50.29, 26.57, 25.04, 21.57; HR-MS (ESI): Calcd for  $\text{C}_{18}\text{H}_{19}\text{NO}_2\text{SNa}^+$   $[\text{M}+\text{Na}]^+$ : 336.1028; found: 336.1032.

### 2-tosyl-octahydro-1H-benzo[1,3]cyclopropa[1,2-c]pyrrole (4f)

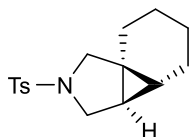

$^1\text{H}$  NMR (300 MHz, Chloroform-*d*)  $\delta$  7.70 – 7.61 (m, 2H), 7.30 (d,  $J = 8.0$  Hz, 2H), 3.47 (dd,  $J = 14.9, 9.0$  Hz, 2H), 3.05 (dd,  $J = 9.0, 3.9$  Hz, 1H), 2.85 (d,  $J = 9.0$  Hz, 1H), 2.42 (s, 3H), 1.86 (ddt,  $J = 13.6, 7.9, 5.8$  Hz, 1H), 1.76 – 1.57 (m, 3H), 1.48 – 1.31 (m, 2H), 1.31 – 1.02 (m, 2H), 1.01 – 0.89 (m, 2H);  $^{13}\text{C}$  NMR (75 MHz, Chloroform-*d*)  $\delta$  143.23, 133.75, 129.52, 127.55, 55.04, 50.76, 27.10, 26.46, 24.19, 23.17, 21.98, 21.79, 21.51, 18.86; HR-MS (ESI): Calcd for  $\text{C}_{16}\text{H}_{22}\text{NO}_2\text{S}^+$   $[\text{M}+\text{H}]^+$ : 292.1365; found: 292.1364.

### 1-phenyl-3-tosyl-3-azabicyclo[3.1.0]hexane (4g)

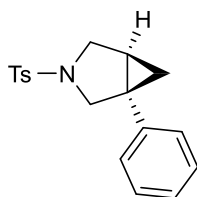

$^1\text{H}$  NMR (300 MHz, Chloroform-*d*)  $\delta$  7.71 (d,  $J = 8.2$  Hz, 2H), 7.35 – 7.16 (m, 5H), 7.09 – 7.02 (m, 2H), 3.89 (d,  $J = 8.9$  Hz, 1H), 3.66 (d,  $J = 9.1$  Hz, 1H), 3.27 – 3.17 (m, 2H), 2.43 (s, 3H), 1.79 (dt,  $J = 8.1, 4.1$  Hz, 1H), 1.14 (t,  $J = 4.7$  Hz, 1H), 0.97 (dd,  $J = 8.1, 5.1$  Hz, 1H);  $^{13}\text{C}$  NMR (75 MHz, Chloroform-*d*)  $\delta$  143.59, 140.34, 133.26, 129.69, 128.53, 127.61, 126.52, 126.45,



53.26, 50.14, 31.10, 23.77, 21.54, 17.34; HR-MS (ESI): Calcd for  $C_{18}H_{19}NO_2SNa^+$   $[M+Na]^+$ : 336.1028; found: 336.1027.

**1-(p-tolyl)-3-tosyl-3-azabicyclo[3.1.0]hexane (4h)**

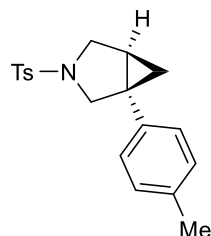

$^1H$  NMR (300 MHz, Chloroform-*d*)  $\delta$  7.66 (d,  $J = 8.3$  Hz, 2H), 7.27 (d,  $J = 8.0$  Hz, 2H), 7.03 (d,  $J = 8.0$  Hz, 2H), 6.90 (d,  $J = 8.2$  Hz, 1H), 3.81 (d,  $J = 8.9$  Hz, 1H), 3.60 (d,  $J = 9.1$  Hz, 1H), 3.19 – 3.10 (m, 2H), 2.38 (s, 3H), 2.25 (s, 3H), 1.70 (dt,  $J = 8.0, 4.1$  Hz, 1H), 1.05 (t,  $J = 4.7$  Hz, 1H), 0.88 (dd,  $J = 8.1, 5.0$  Hz, 1H);  $^{13}C$  NMR (75 MHz, Chloroform-*d*)  $\delta$  143.57, 137.23, 136.25, 133.27, 129.68, 129.20, 127.61, 126.51, 53.50, 50.20, 30.87, 23.58, 21.54, 20.97, 17.02; HR-MS (ESI): Calcd for  $C_{19}H_{21}NO_2SNa^+$   $[M+Na]^+$ : 350.1185; found: 350.1186.

**1-(4-chlorophenyl)-3-tosyl-3-azabicyclo[3.1.0]hexane (4i)**

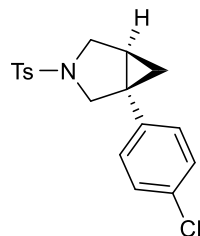

$^1H$  NMR (300 MHz, Chloroform-*d*)  $\delta$  7.70 (d,  $J = 8.3$  Hz, 2H), 7.32 (d,  $J = 8.0$  Hz, 2H), 7.21 (d,  $J = 8.5$  Hz, 2H), 6.98 (d,  $J = 8.5$  Hz, 2H), 3.85 (d,  $J = 9.0$  Hz, 1H), 3.64 (d,  $J = 9.2$  Hz, 1H), 3.23 – 3.14 (m, 2H), 2.42 (s, 3H), 1.76 (dt,  $J = 7.9, 3.9$  Hz, 1H), 1.12 (t,  $J = 4.8$  Hz, 1H), 0.93 (dd,  $J = 8.0, 5.2$  Hz, 1H);  $^{13}C$  NMR (75 MHz, Chloroform-*d*)  $\delta$  143.71, 138.81, 133.22, 132.30, 129.75, 128.63, 127.99, 127.58, 53.20, 50.06, 30.68, 23.89, 21.57, 17.20. HR-MS (ESI): Calcd for  $C_{18}H_{18}ClNO_2SNa^+$   $[M+Na]^+$ : 370.0639; found: 370.0647.

**methyl 4-(3-tosyl-3-azabicyclo[3.1.0]hexan-1-yl)benzoate (4j)**

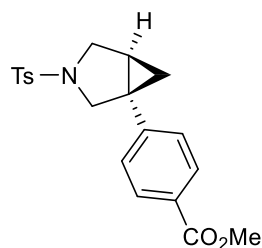

$^1\text{H}$  NMR (300 MHz, Chloroform-*d*)  $\delta$  7.90 (d,  $J$  = 8.2 Hz, 2H), 7.70 (d,  $J$  = 8.0 Hz, 2H), 7.32 (d,  $J$  = 8.0 Hz, 2H), 7.06 (d,  $J$  = 8.2 Hz, 2H), 3.89 (d,  $J$  = 9.3 Hz, 2H), 3.87 (s, 3H), 3.65 (d,  $J$  = 9.2 Hz, 1H), 3.25 (d,  $J$  = 9.0 Hz, 1H), 3.19 (dd,  $J$  = 9.2, 3.7 Hz, 1H), 2.41 (s, 3H), 1.86 (dt,  $J$  = 8.1, 4.0 Hz, 1H), 1.21 (dd,  $J$  = 10.0, 5.2 Hz, 1H), 1.00 (dd,  $J$  = 8.1, 5.2 Hz, 1H);  $^{13}\text{C}$  NMR (75 MHz, Chloroform-*d*)  $\delta$  166.72, 145.88, 143.75, 133.13, 129.80, 129.76, 128.21, 127.59, 126.00, 52.52, 52.12, 49.93, 31.04, 24.72, 21.55, 18.36; HR-MS (ESI): Calcd for  $\text{C}_{20}\text{H}_{21}\text{NO}_4\text{SNa}^+$  [ $\text{M}+\text{Na}$ ] $^+$ : 394.1083; found: 394.1078.

#### 1-(naphthalen-2-yl)-3-tosyl-3-azabicyclo[3.1.0]hexane (4k)

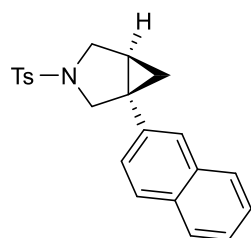

$^1\text{H}$  NMR (300 MHz, Chloroform-*d*)  $\delta$  7.83 – 7.74 (m, 5H), 7.55 (d,  $J$  = 1.8 Hz, 1H), 7.47 (tt,  $J$  = 6.9, 5.1 Hz, 2H), 7.36 (d,  $J$  = 8.0 Hz, 2H), 7.16 (dd,  $J$  = 8.6, 1.9 Hz, 1H), 4.01 (d,  $J$  = 9.0 Hz, 1H), 3.74 (d,  $J$  = 9.1 Hz, 1H), 3.39 (d,  $J$  = 9.0 Hz, 1H), 3.30 (dd,  $J$  = 9.1, 3.7 Hz, 1H), 2.45 (s, 3H), 1.93 (dt,  $J$  = 8.1, 4.1 Hz, 1H), 1.23 (t,  $J$  = 4.7 Hz, 1H), 1.10 (dd,  $J$  = 8.0, 5.1 Hz, 1H);  $^{13}\text{C}$  NMR (75 MHz, Chloroform-*d*)  $\delta$  143.64, 137.65, 133.33, 133.25, 132.11, 129.75, 128.31, 127.63, 127.43, 126.42, 125.76, 125.20, 124.64, 53.38, 50.22, 31.42, 23.82, 21.57, 17.26; HR-MS (ESI): Calcd for  $\text{C}_{22}\text{H}_{21}\text{NO}_2\text{SNa}^+$  [ $\text{M}+\text{Na}$ ] $^+$ : 386.1185; found: 386.1186.

#### 3-tosyl-3-azabicyclo[3.1.0]hexan-1-yl)methyl thiophene-2-carboxylate (4l)

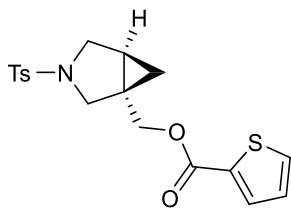

$^1\text{H}$  NMR (300 MHz, Chloroform-*d*)  $\delta$  7.72 (dd,  $J = 3.8, 1.3$  Hz, 1H), 7.71 – 7.66 (m, 2H), 7.56 (dd,  $J = 5.0, 1.3$  Hz, 1H), 7.32 (d,  $J = 8.0$  Hz, 2H), 7.10 (dd,  $J = 5.0, 3.7$  Hz, 1H), 4.36 – 4.15 (m, 2H), 3.66 (d,  $J = 9.2$  Hz, 1H), 3.54 (d,  $J = 9.3$  Hz, 1H), 3.14 – 3.06 (m, 2H), 2.43 (s, 3H), 1.52 – 1.40 (m, 1H), 0.82 (d,  $J = 6.2$  Hz, 2H);  $^{13}\text{C}$  NMR (75 MHz, Chloroform-*d*)  $\delta$  161.95, 143.54, 133.61, 133.15, 132.66, 129.66, 127.81, 127.60, 66.90, 51.54, 49.80, 27.26, 21.56, 20.96, 13.16; HR-MS (ESI): Calcd for  $\text{C}_{18}\text{H}_{19}\text{NO}_4\text{S}_2\text{Na}^+$   $[\text{M}+\text{Na}]^+$ : 400.0647; found: 400.0647.

#### 1-(((tert-butyl)dimethylsilyl)oxy)methyl)-3-tosyl-3-azabicyclo[3.1.0]hexane (4m)

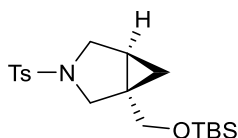

$^1\text{H}$  NMR (300 MHz, Chloroform-*d*)  $\delta$  7.71 – 7.64 (m, 2H), 7.37 – 7.27 (m, 2H), 3.65 (d,  $J = 10.9$  Hz, 1H), 3.48 (d,  $J = 9.1$  Hz, 2H), 3.44 (d,  $J = 11.1$  Hz, 1H), 3.11 – 2.98 (m, 2H), 2.42 (s, 3H), 1.30 – 1.20 (m, 1H), 0.77 (s, 8H), 0.69 – 0.53 (m, 2H), -0.05 (d,  $J = 7.5$  Hz, 5H);  $^{13}\text{C}$  NMR (75 MHz, Chloroform-*d*)  $\delta$  143.40, 133.01, 129.57, 127.61, 64.32, 51.03, 50.30, 30.05, 25.74, 21.52, 20.06, 18.11, 12.22, -5.36, -5.44; HR-MS (ESI): Calcd for  $\text{C}_{19}\text{H}_{31}\text{NO}_3\text{SSiNa}^+$   $[\text{M}+\text{Na}]^+$ : 404.1686; found: 404.1689.

#### 1-((benzyloxy)methyl)-3-tosyl-3-azabicyclo[3.1.0]hexane (4n)

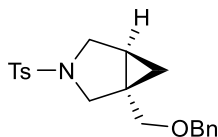

$^1\text{H}$  NMR (300 MHz, Chloroform-*d*)  $\delta$  7.68 (d,  $J = 8.0$  Hz, 2H), 7.30 (t,  $J = 7.9$  Hz, 5H), 7.26 – 7.20 (m, 2H), 4.44 (d,  $J = 3.1$  Hz, 2H), 3.59 (d,  $J = 9.1$  Hz, 1H), 3.51 (d,  $J = 9.3$  Hz, 1H), 3.49 – 3.37 (m, 2H), 3.11 (dd,  $J = 9.2, 4.8$  Hz, 2H), 2.43 (s, 3H), 1.30 (dt,  $J = 8.1, 4.1$  Hz, 1H), 0.66 (dd,  $J = 9.2, 3.5$  Hz, 2H);  $^{13}\text{C}$  NMR (75 MHz, Chloroform-*d*)  $\delta$  143.43, 137.99, 133.55, 129.62,

128.42, 127.73, 127.57, 127.55, 72.70, 72.02, 51.61, 49.91, 27.86, 21.56, 20.13, 12.92; HR-MS (ESI): Calcd for  $C_{20}H_{23}NO_3SNa^+$   $[M+Na]^+$ : 380.1291; found: 380.1292.

**1-bromo-3-tosyl-3-azabicyclo[3.1.0]hexane (4o)**

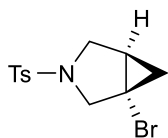

$^1H$  NMR (300 MHz, Chloroform-*d*)  $\delta$  7.66 (d,  $J = 8.3$  Hz, 2H), 7.34 (d,  $J = 8.0$  Hz, 2H), 3.87 (d,  $J = 9.2$  Hz, 1H), 3.47 (d,  $J = 9.5$  Hz, 1H), 3.24 – 3.16 (m, 2H), 2.44 (s, 3H), 1.76 (ddd,  $J = 8.6, 4.7, 3.7$  Hz, 1H), 1.28 – 1.15 (m, 1H), 1.15 – 1.05 (m, 1H);  $^{13}C$  NMR (75 MHz, Chloroform-*d*)  $\delta$  143.97, 133.11, 129.85, 127.53, 55.89, 49.20, 29.58, 25.03, 21.58, 17.60; HR-MS (ESI): Calcd for  $C_{12}H_{15}BrNO_2S^+$   $[M+H]^+$ : 316.0001; found: 316.0002.

**tert-butyl-1-methyl-3-azabicyclo[3.1.0]hexane-3-carboxylate (4p)**

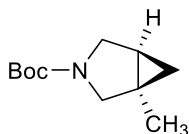

$^1H$  NMR (300 MHz, Chloroform-*d*)  $\delta$  3.52 (dt,  $J = 18.7, 9.7$  Hz, 2H), 3.43 – 3.29 (m, 1H), 3.10 (d,  $J = 10.4$  Hz, 1H), 1.41 (s, 9H), 1.21 (s, 3H), 1.16 – 1.07 (m, 1H), 0.53 (dd,  $J = 7.8, 4.8$  Hz, 1H), 0.31 (t,  $J = 4.4$  Hz, 1H);  $^{13}C$  NMR (75 MHz, Chloroform-*d*)  $\delta$  155.03, 79.07, 53.34, 52.92, 49.81, 48.98, 48.62, 28.48, 23.23, 22.65, 22.48, 21.98, 18.65, 16.02; HR-MS (ESI): Calcd for  $C_{11}H_{19}NO_2Na^+$   $[M+Na]^+$ : 220.1308; found: 220.1306.

**benzyl-1-methyl-3-azabicyclo[3.1.0]hexane-3-carboxylate (4q)**

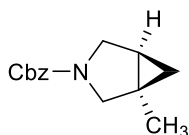

$^1H$  NMR (300 MHz, Chloroform-*d*)  $\delta$  7.41 – 7.29 (m, 5H), 5.10 (d,  $J = 2.4$  Hz, 2H), 3.61 (ddd,  $J = 17.7, 13.5, 10.5$  Hz, 2H), 3.45 (dt,  $J = 10.1, 4.4$  Hz, 1H), 3.25 – 3.16 (m, 1H), 1.24 (d,  $J = 6.1$  Hz, 3H), 1.25 – 1.13 (m, 1H), 0.58 (dd,  $J = 7.9, 4.9$  Hz, 1H), 0.35 (t,  $J = 4.4$  Hz,

1H);  $^{13}\text{C}$  NMR (75 MHz, Chloroform-*d*)  $\delta$  155.29, 136.95, 128.44, 127.88, 127.79, 127.76, 66.66, 53.52, 53.14, 49.28, 48.87, 23.38, 22.66, 21.96, 18.63, 16.12; HR-MS (ESI): Calcd for  $\text{C}_{14}\text{H}_{17}\text{NO}_2\text{Na}^+$   $[\text{M}+\text{Na}]^+$ : 254.1151; found: 254.1155.

## 2.3 Characterization data of products centanafadine and bicifadine

### Centanafadine

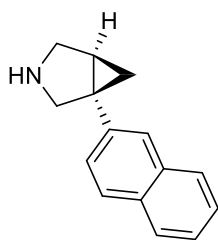

$^1\text{H}$  NMR (300 MHz, Chloroform-*d*)  $\delta$  7.81 (t,  $J = 7.7$  Hz, 3H), 7.73 – 7.64 (m, 1H), 7.52 – 7.36 (m, 2H), 7.36 – 7.26 (m, 1H), 3.39 (q,  $J = 11.2$  Hz, 2H), 3.28 – 3.11 (m, 2H), 1.86 (dt,  $J = 7.8, 3.8$  Hz, 1H), 1.12 (dd,  $J = 8.0, 5.2$  Hz, 1H), 1.02 (t,  $J = 4.9$  Hz, 1H);  $^{13}\text{C}$  NMR (75 MHz, Chloroform-*d*)  $\delta$  139.42, 133.42, 132.02, 128.02, 127.59, 127.42, 126.17, 125.54, 125.50, 125.40, 53.17, 49.28, 33.03, 25.91, 14.83; HR-MS (ESI): Calcd for  $\text{C}_{15}\text{H}_{16}\text{N}^+$   $[\text{M}+\text{H}]^+$ : 210.1276; found: 210.1283.

### Bicifadine

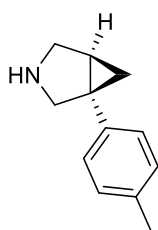

$^1\text{H}$  NMR (300 MHz, Chloroform-*d*)  $\delta$  7.13 (s, 4H), 3.36 – 3.19 (m, 2H), 3.17 – 3.04 (m, 2H), 3.01 (s, 2H), 2.35 (s, 3H), 1.70 (ddd,  $J = 7.8, 4.4, 3.2$  Hz, 1H), 0.97 (dd,  $J = 8.1, 5.1$  Hz, 1H), 0.89 (q,  $J = 4.6$  Hz, 1H);  $^{13}\text{C}$  NMR (75 MHz, Chloroform-*d*)  $\delta$  139.04, 135.60, 129.04, 127.05, 53.36, 49.27, 32.48, 25.70, 20.98, 14.54; HR-MS (ESI): Calcd for  $\text{C}_{12}\text{H}_{16}\text{N}^+$   $[\text{M}+\text{H}]^+$ : 174.1276; found: 174.1287.

### 3. Reference

- [1] P. Zhou, X. X. Li, D. Wang and T. Xu, Dual Nickel- and Photoredox-Catalyzed Reductive Cross-Coupling to Access Chiral Trifluoromethylated Alkanes, *Org. Lett.*, 2021, **23**, 4683.
- [2] A. R. Reddy, C.-Y. Zhou, Z. Guo, J. Wei and C.-M. Che, Ruthenium-Porphyrin-Catalyzed Diastereoselective Intramolecular Alkyl Carbene Insertion into C-H Bonds of Alkyl Diazomethanes Generated In Situ from N-Tosylhydrazones, *Angew. Chem., Int. Ed.*, 2014, **53**, 14175.

## 4. NMR Spectra of Compounds

### NMR Spectra of arenesulfonylhydrazones

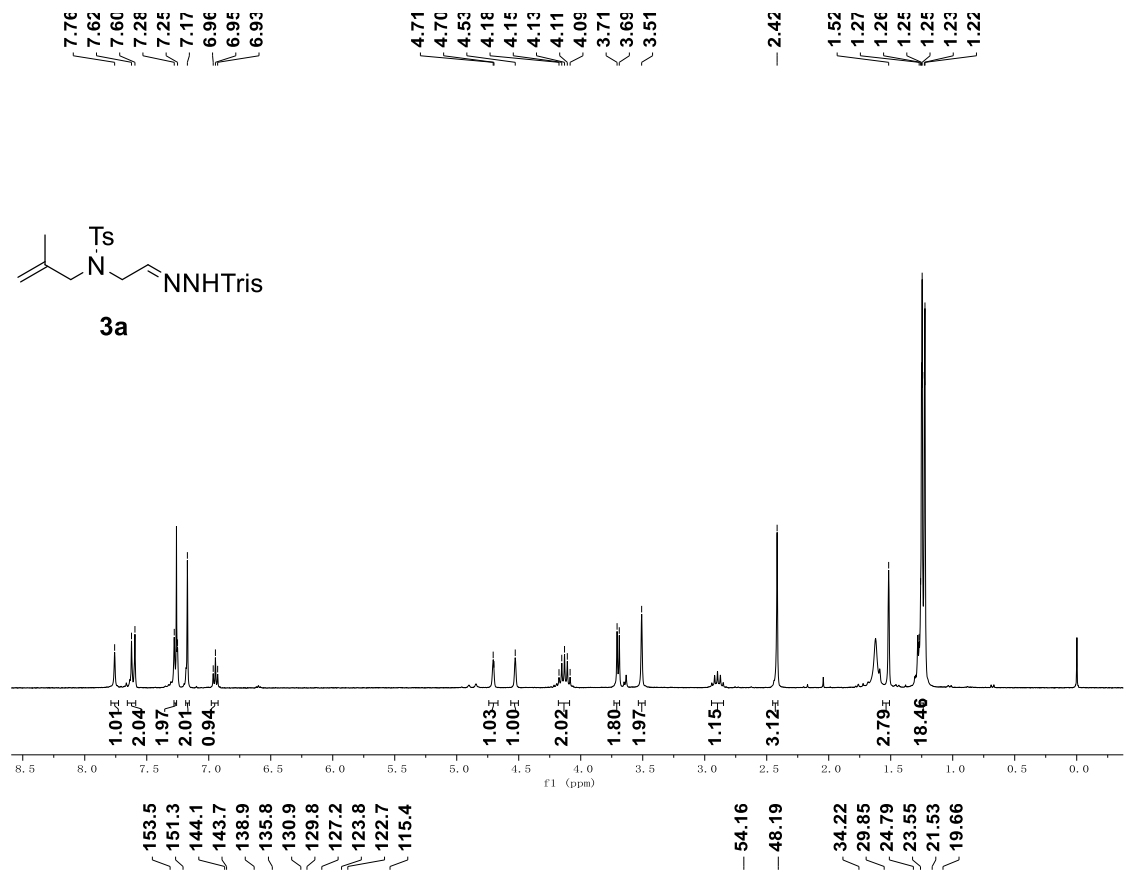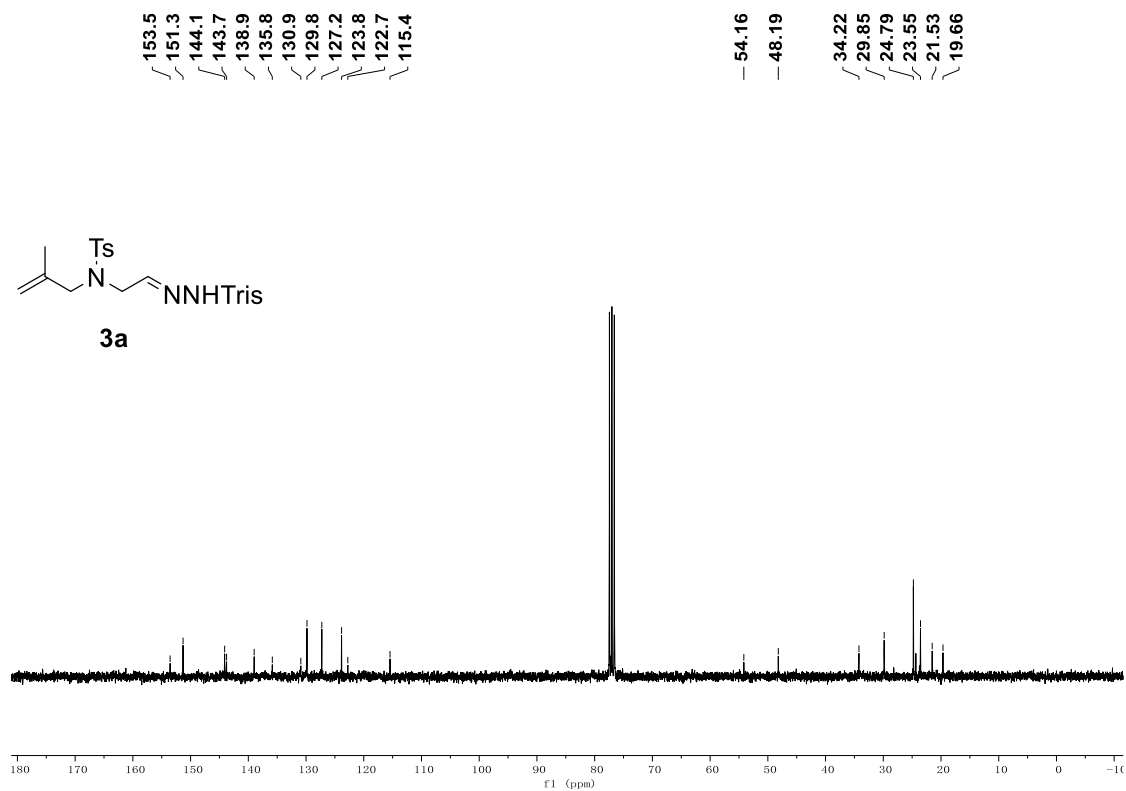

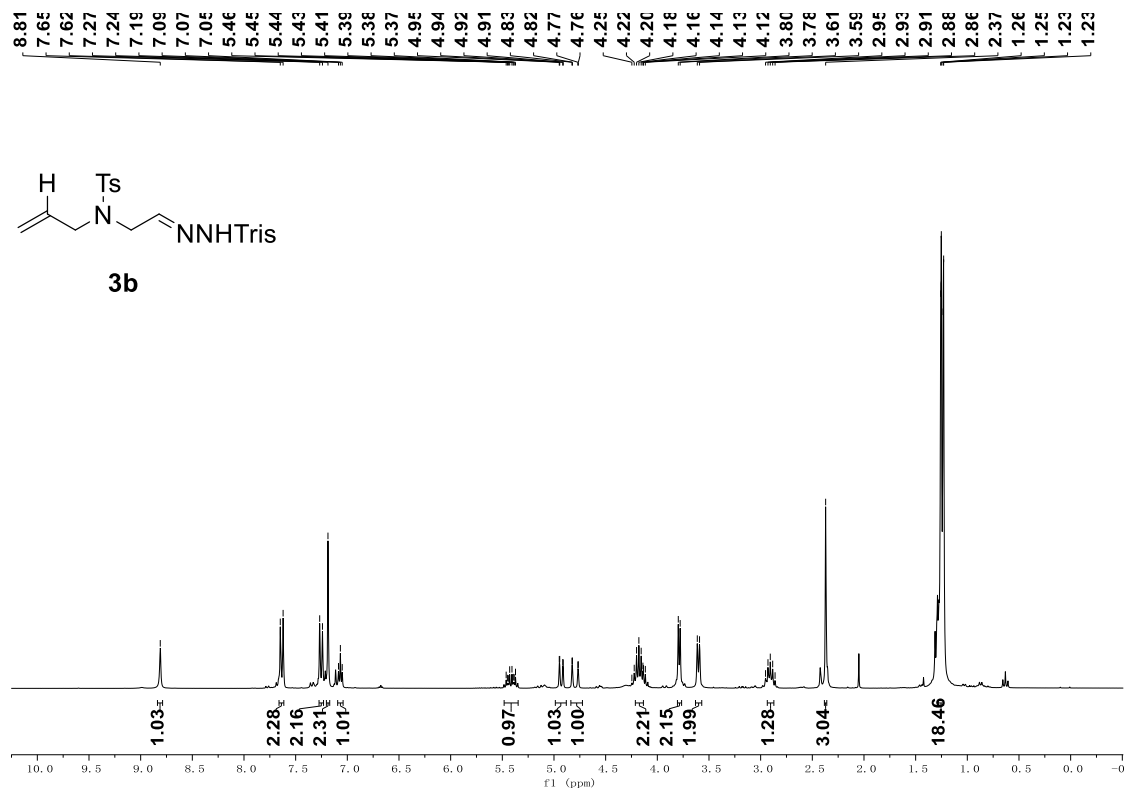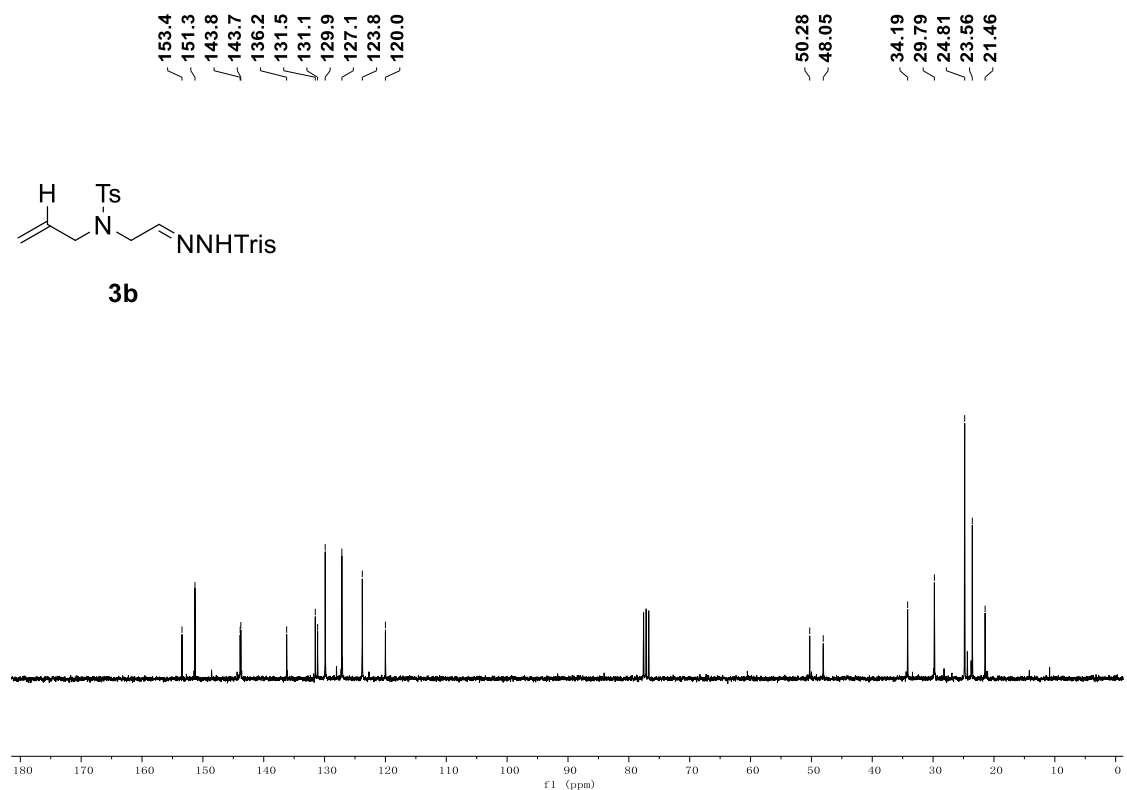



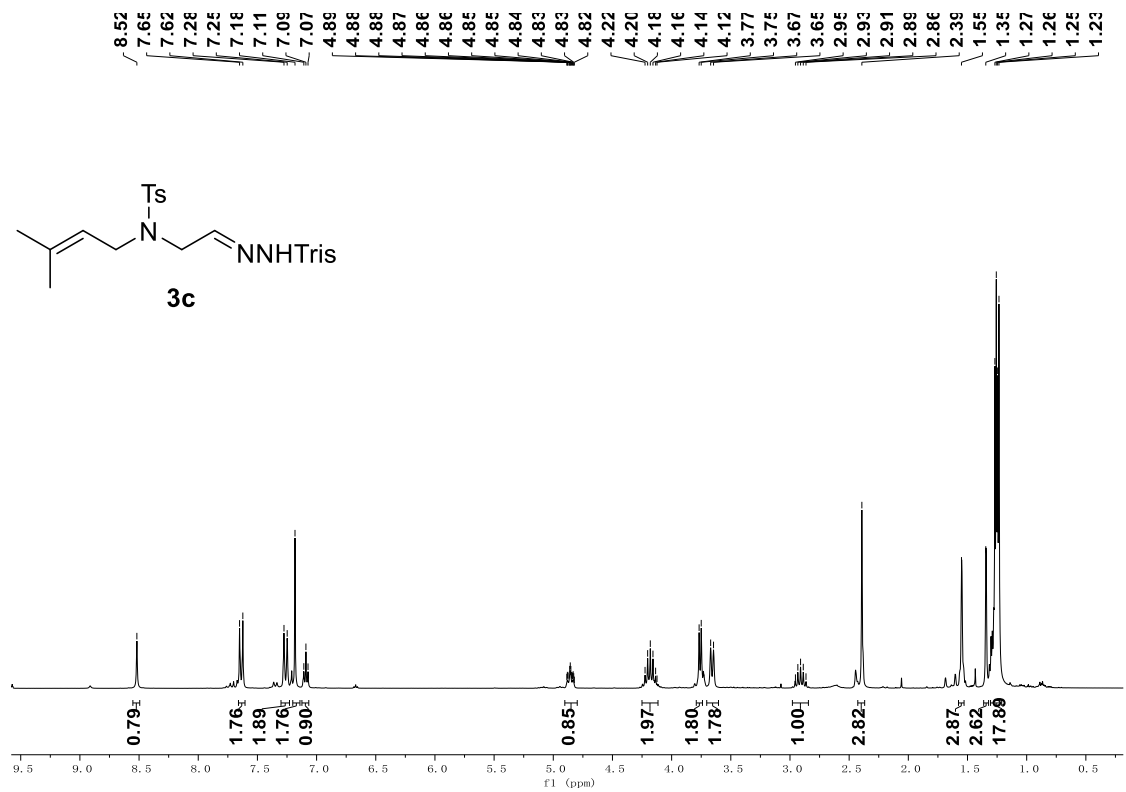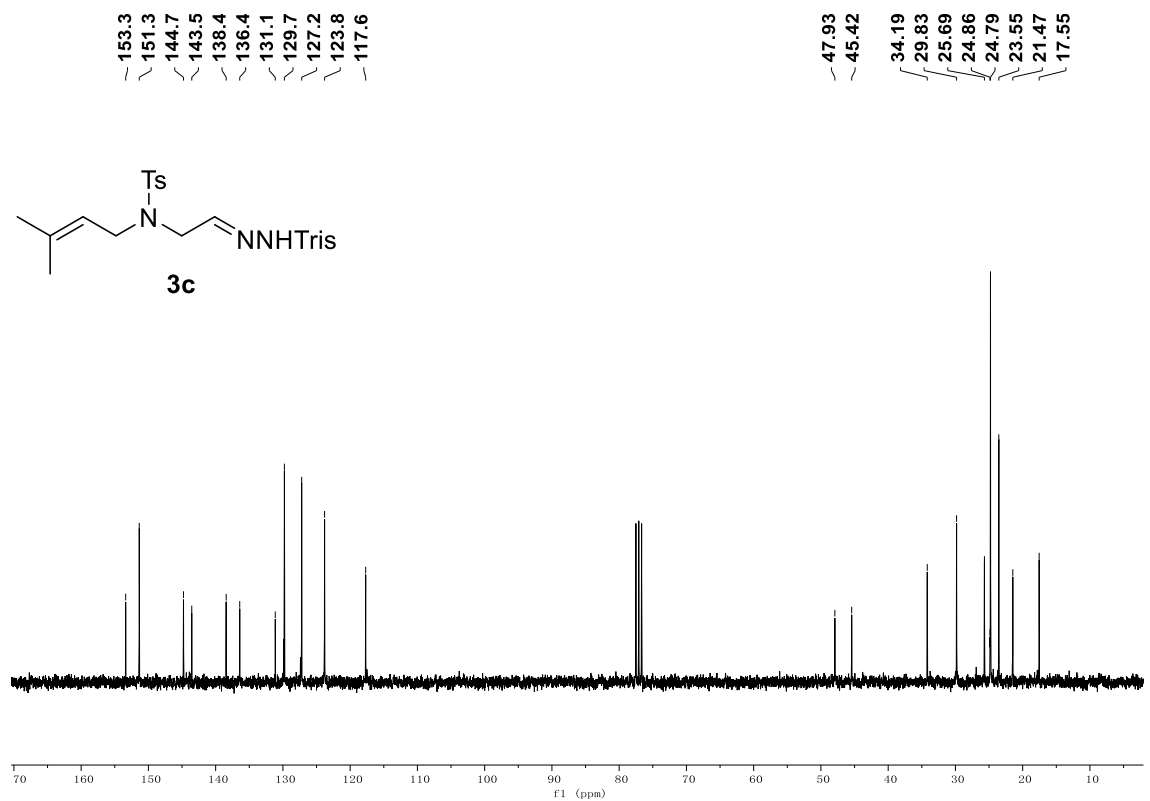

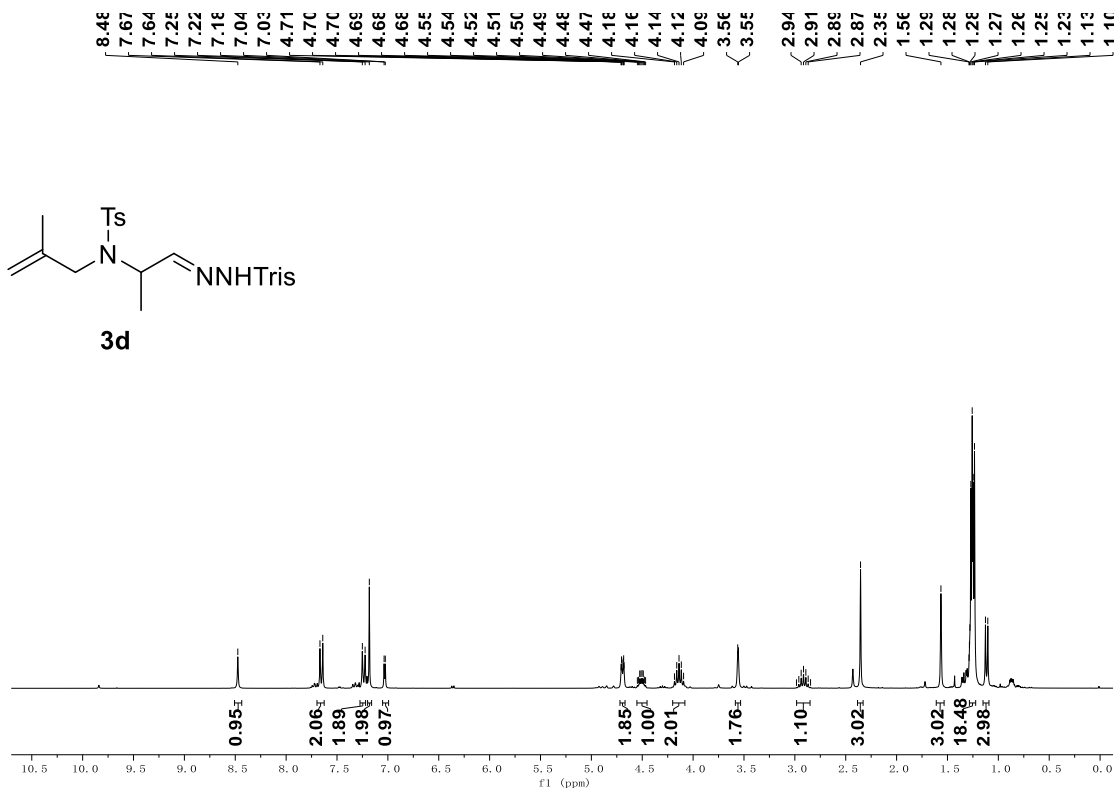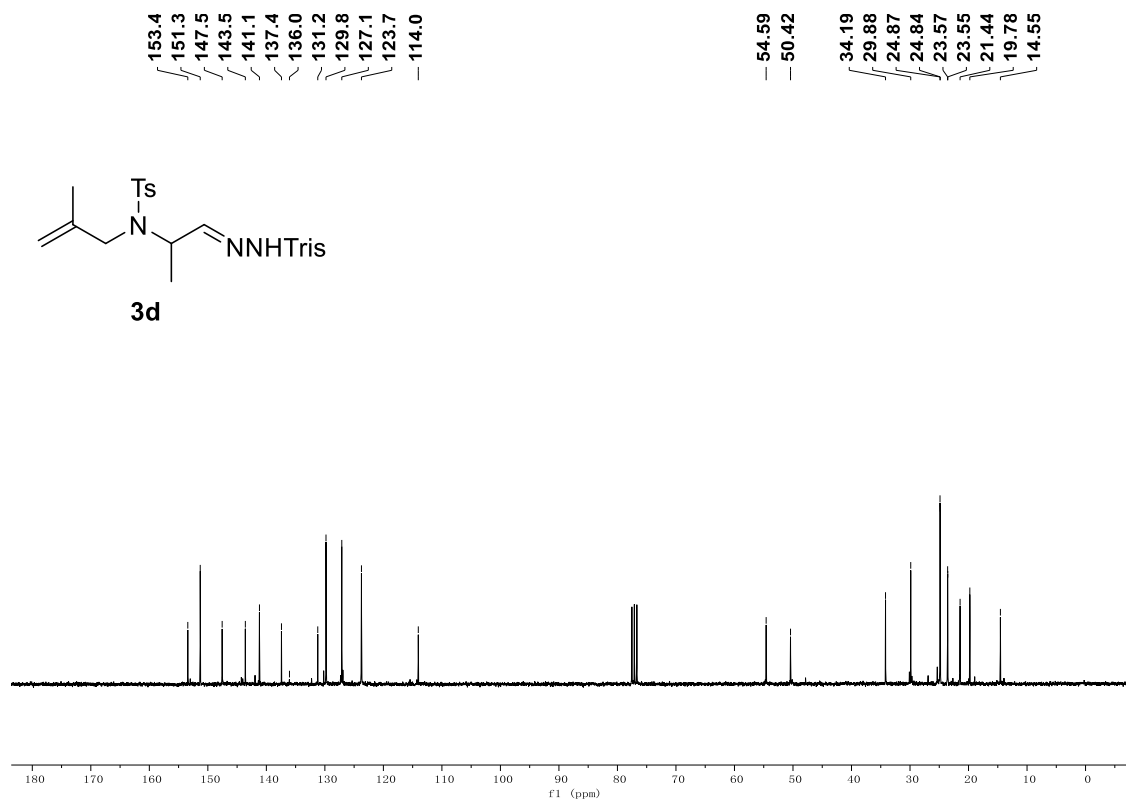

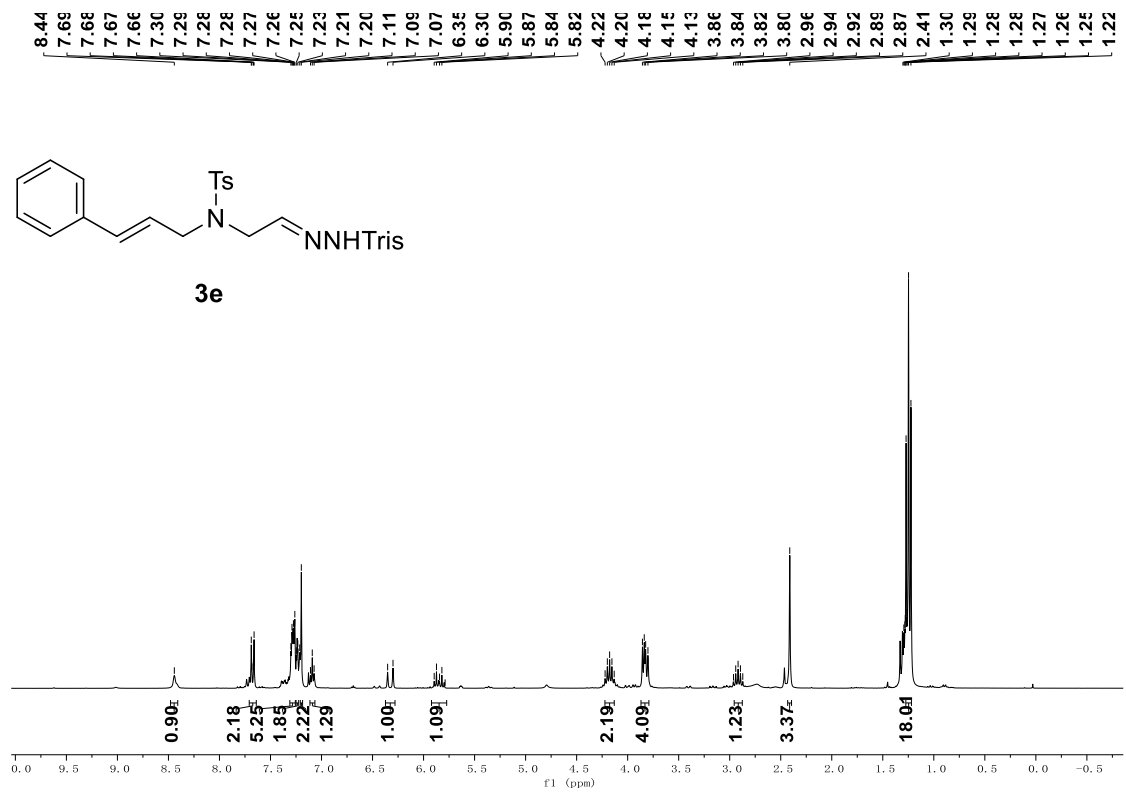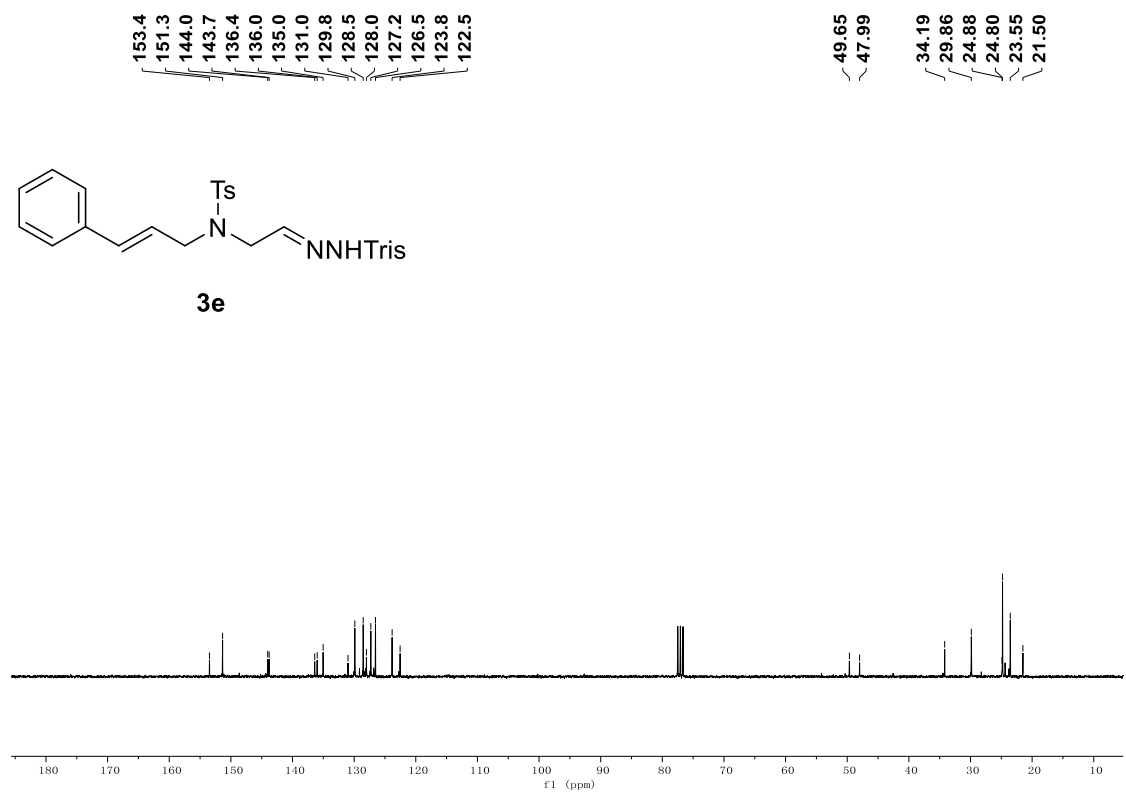

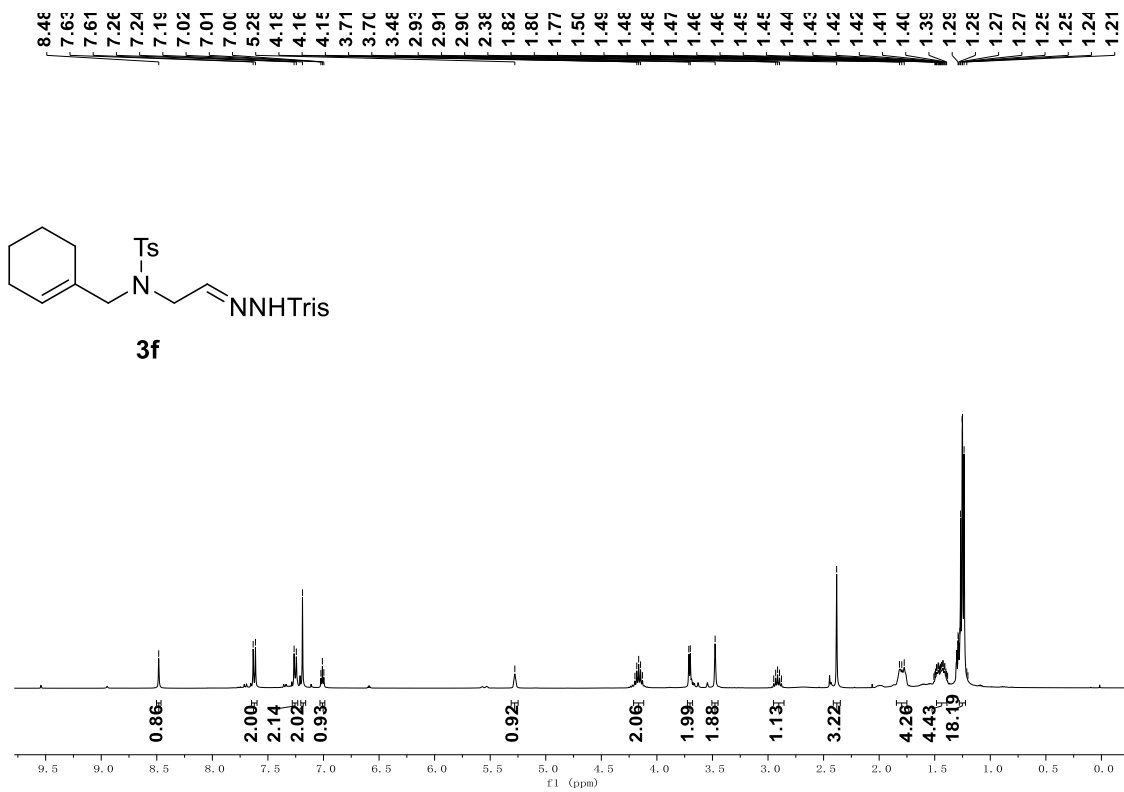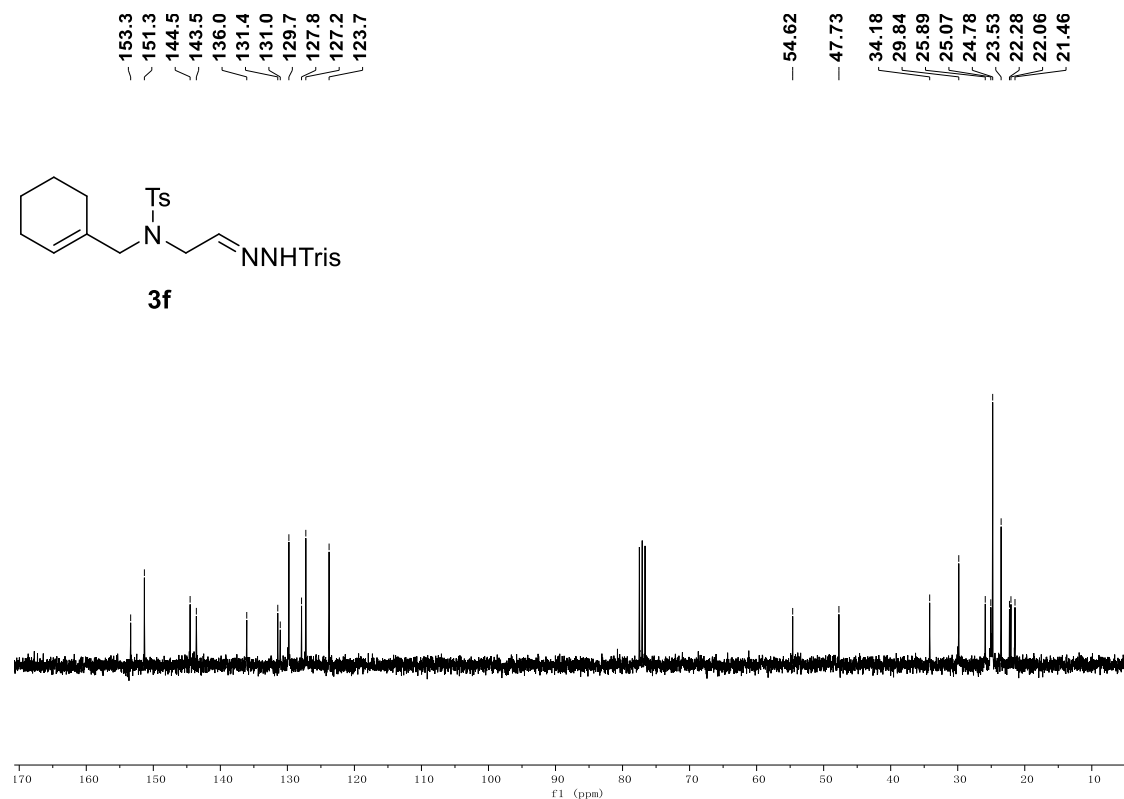

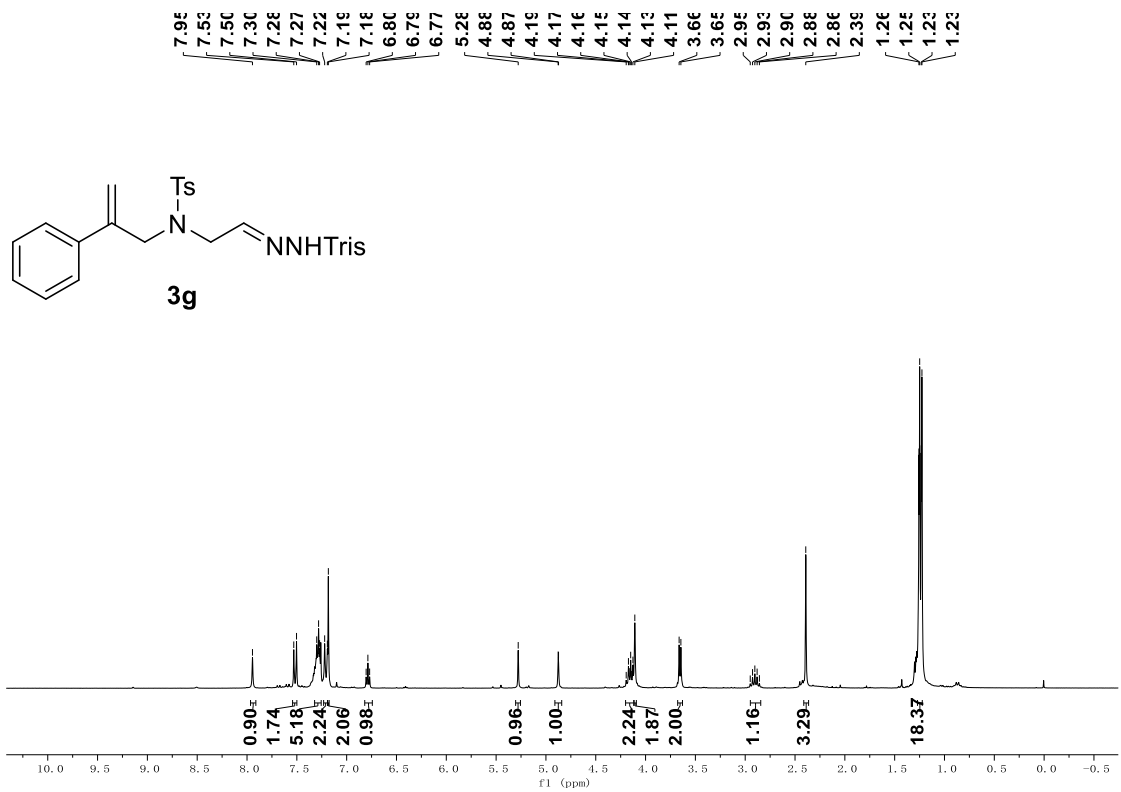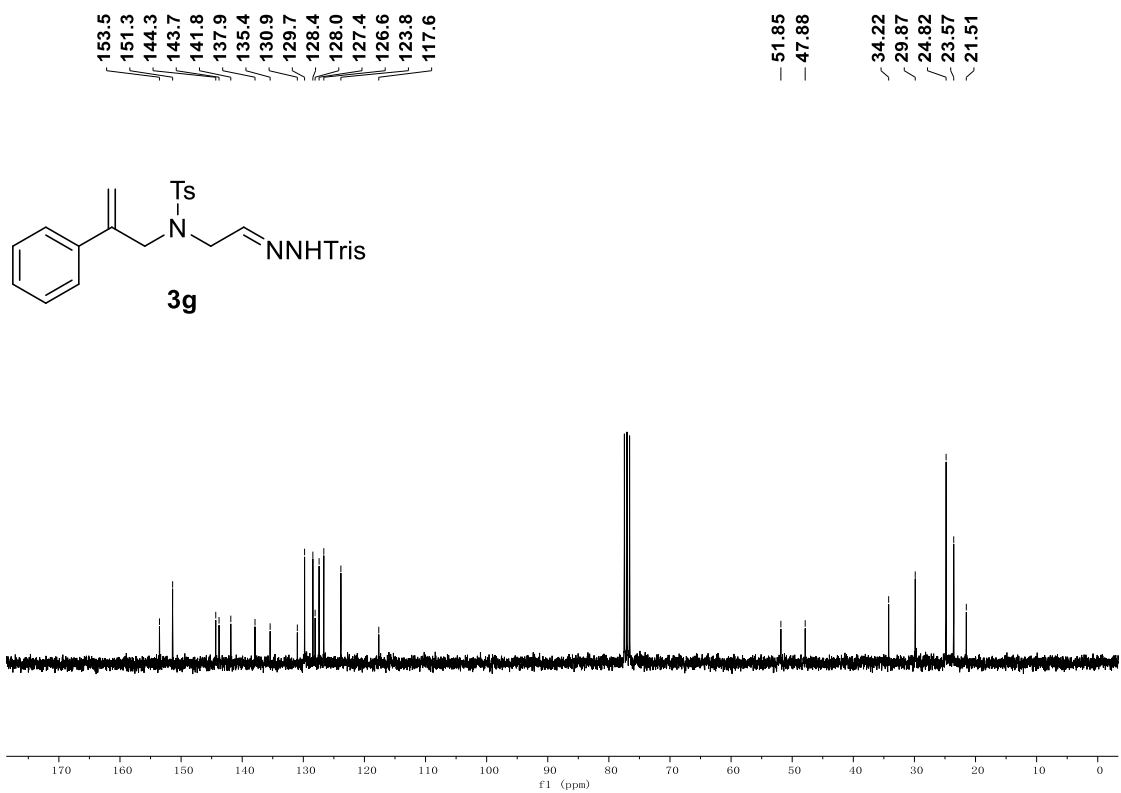

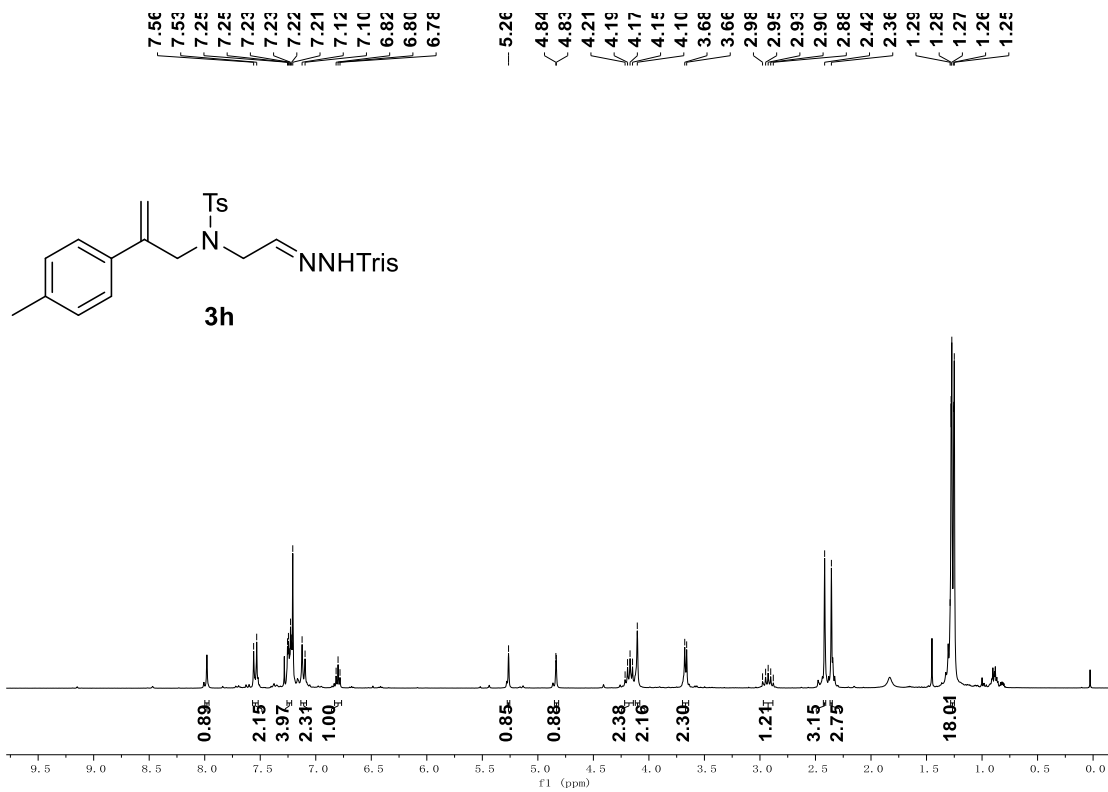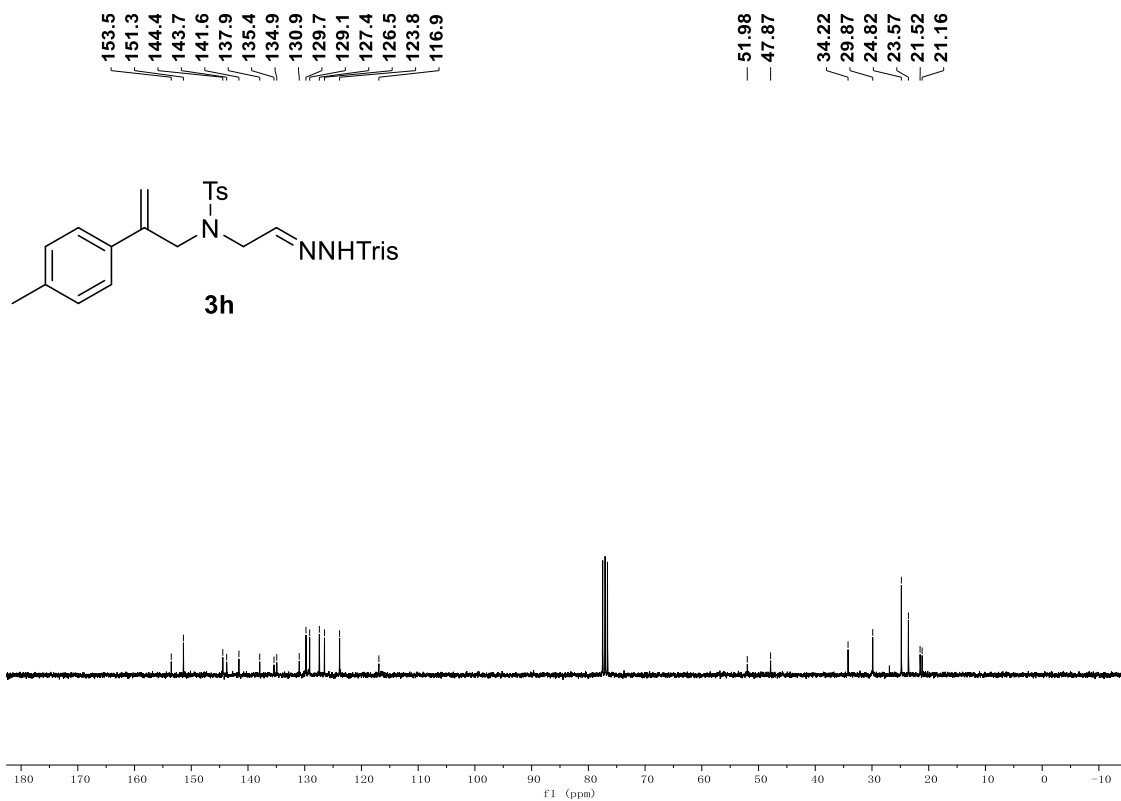

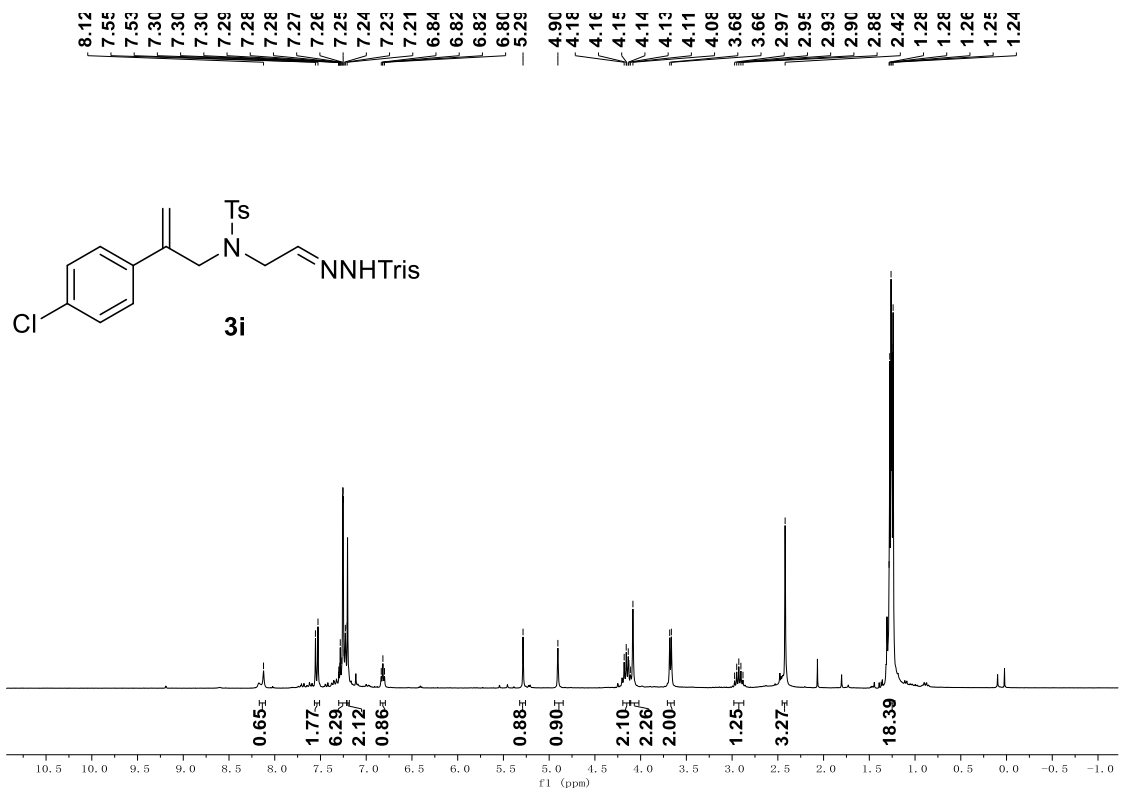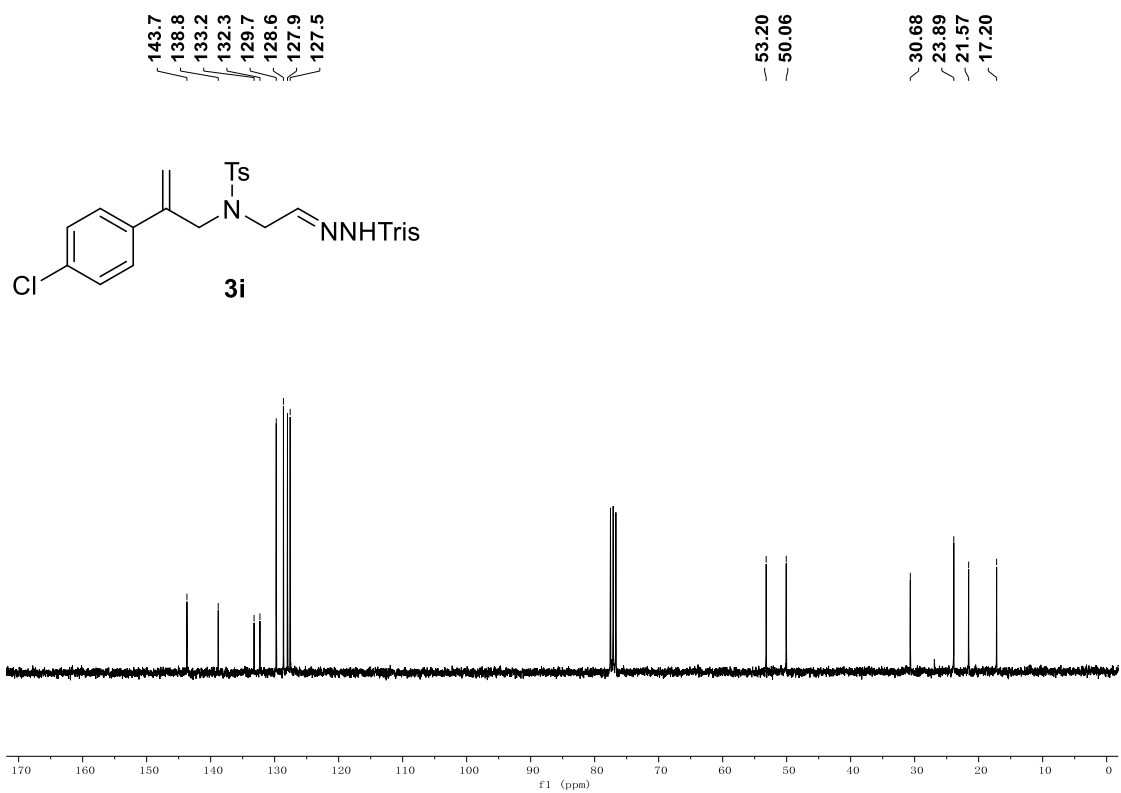

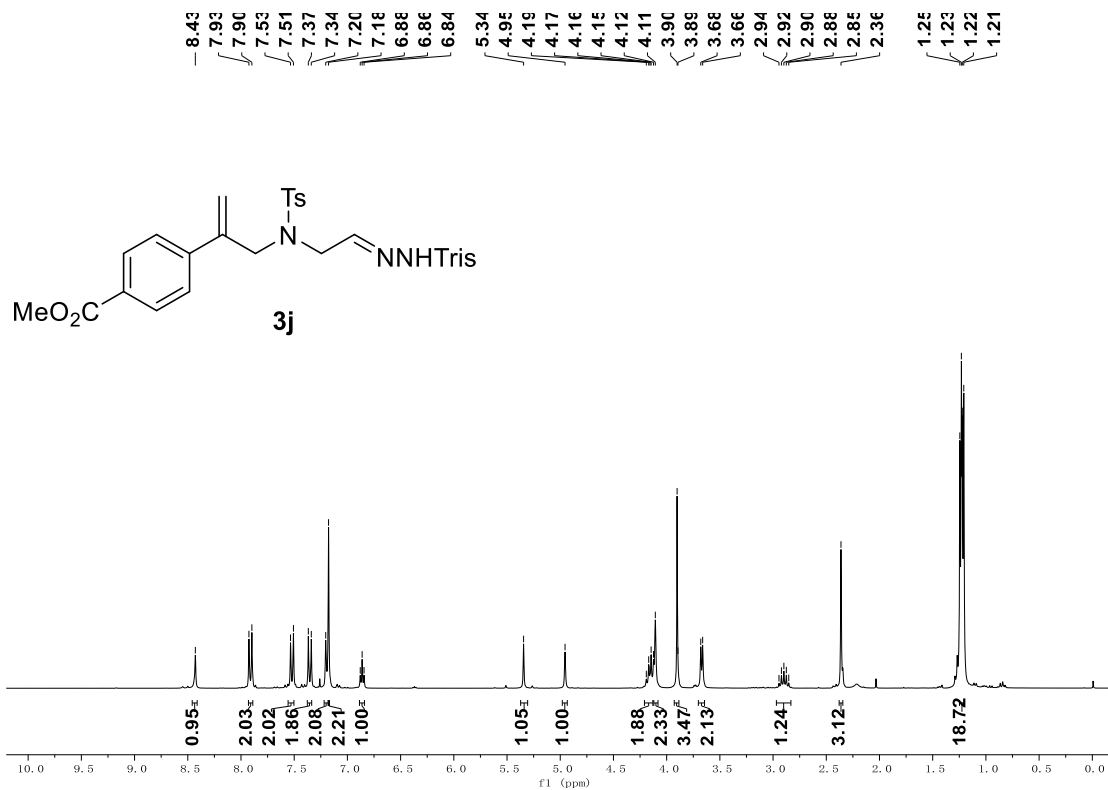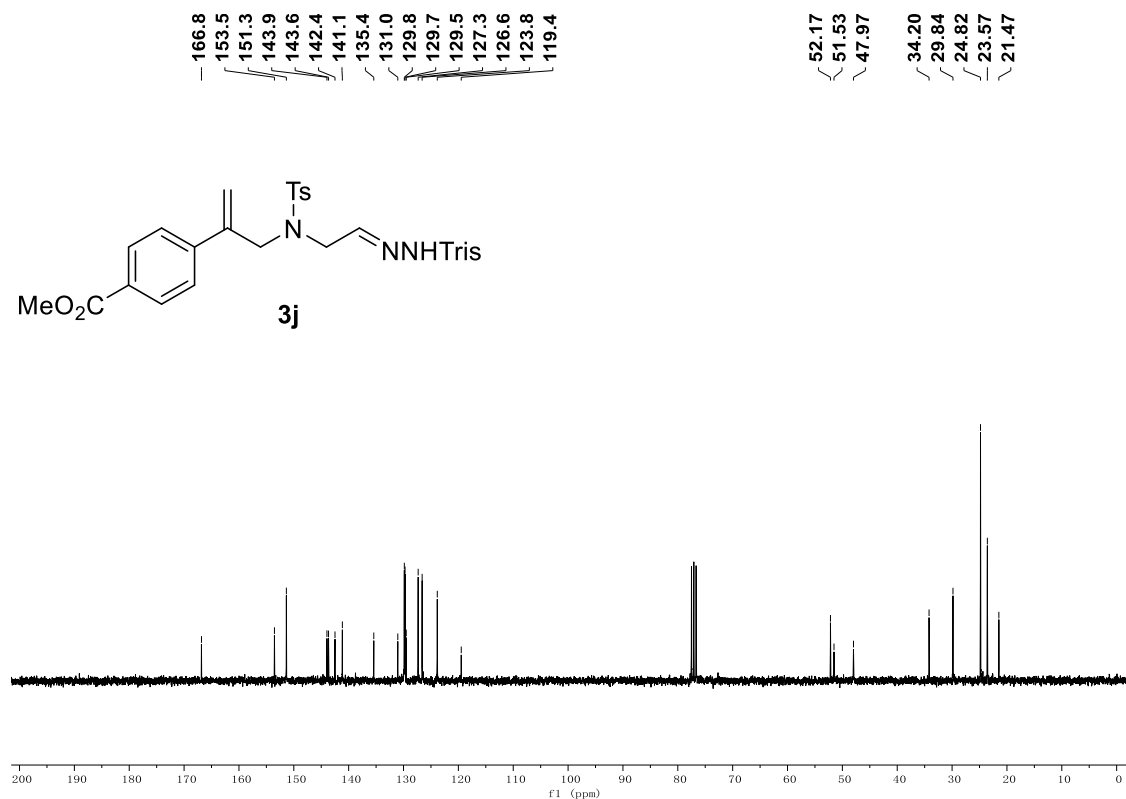



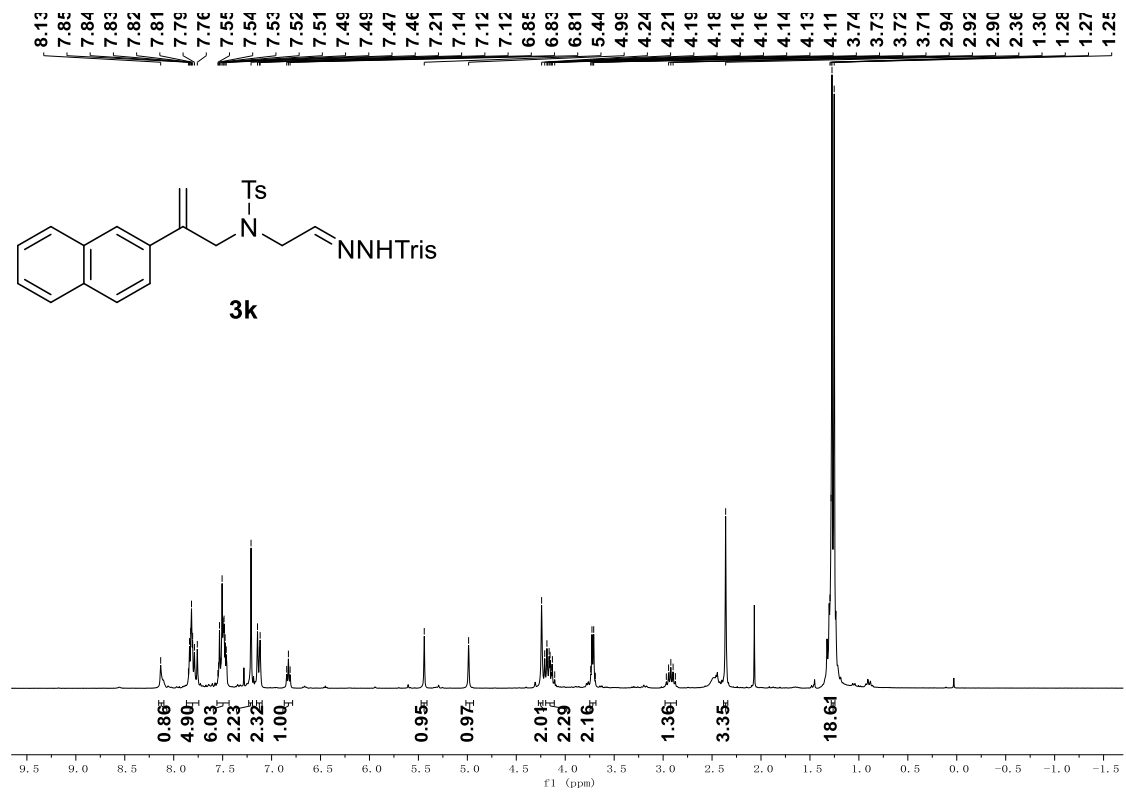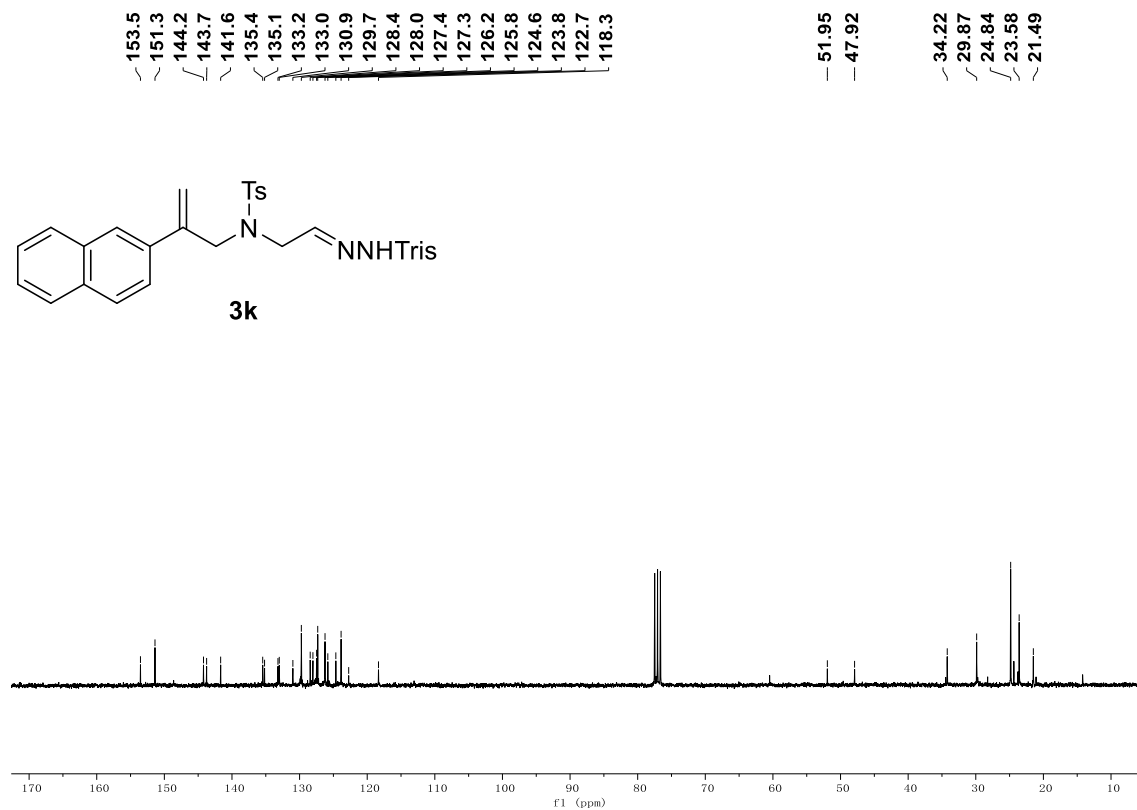

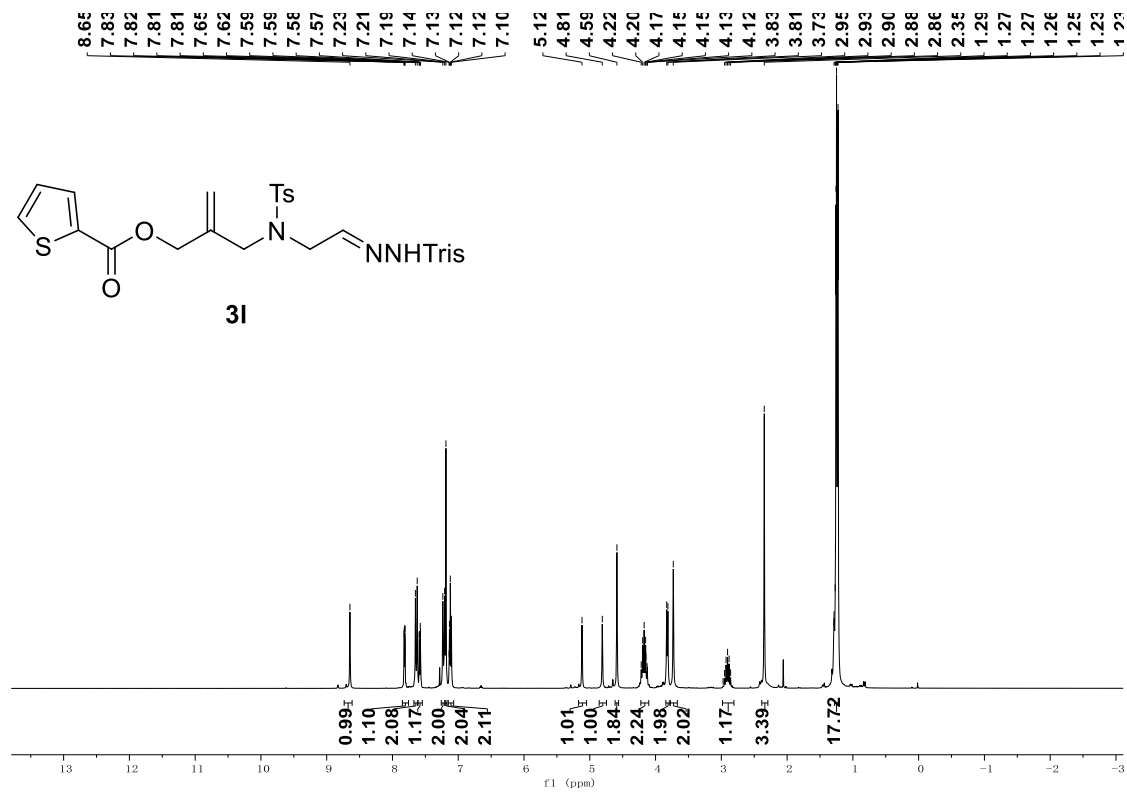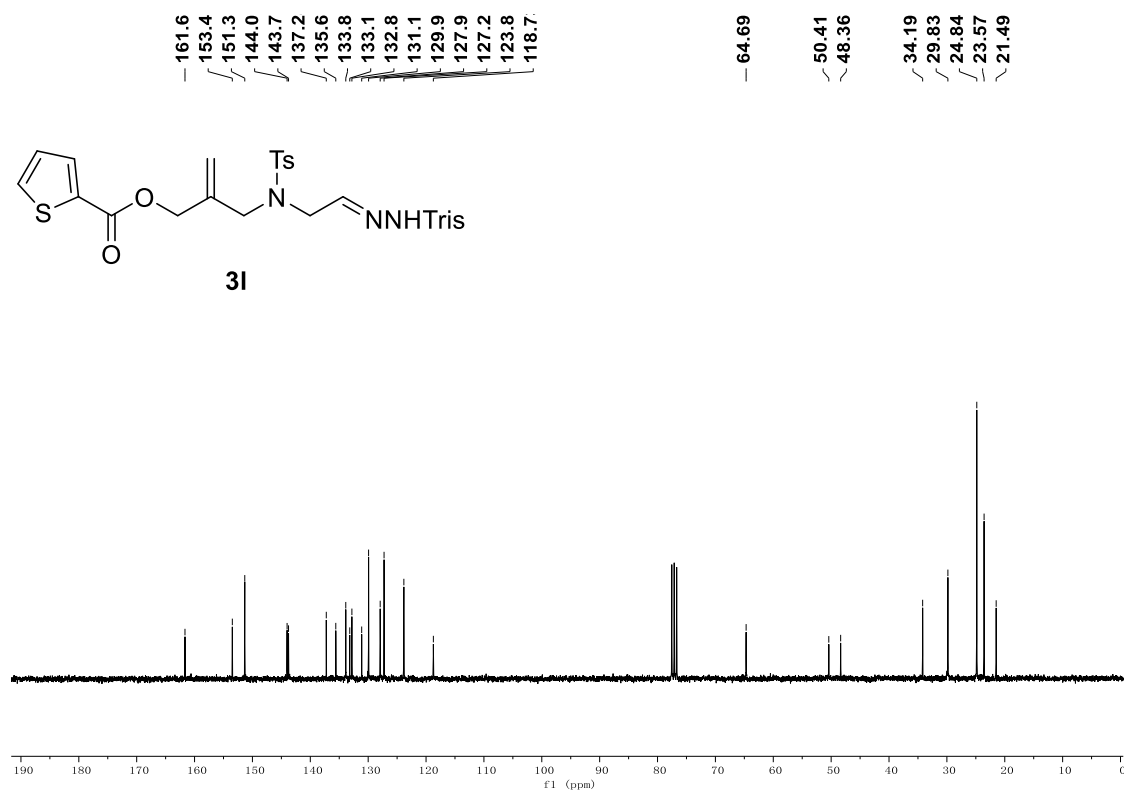



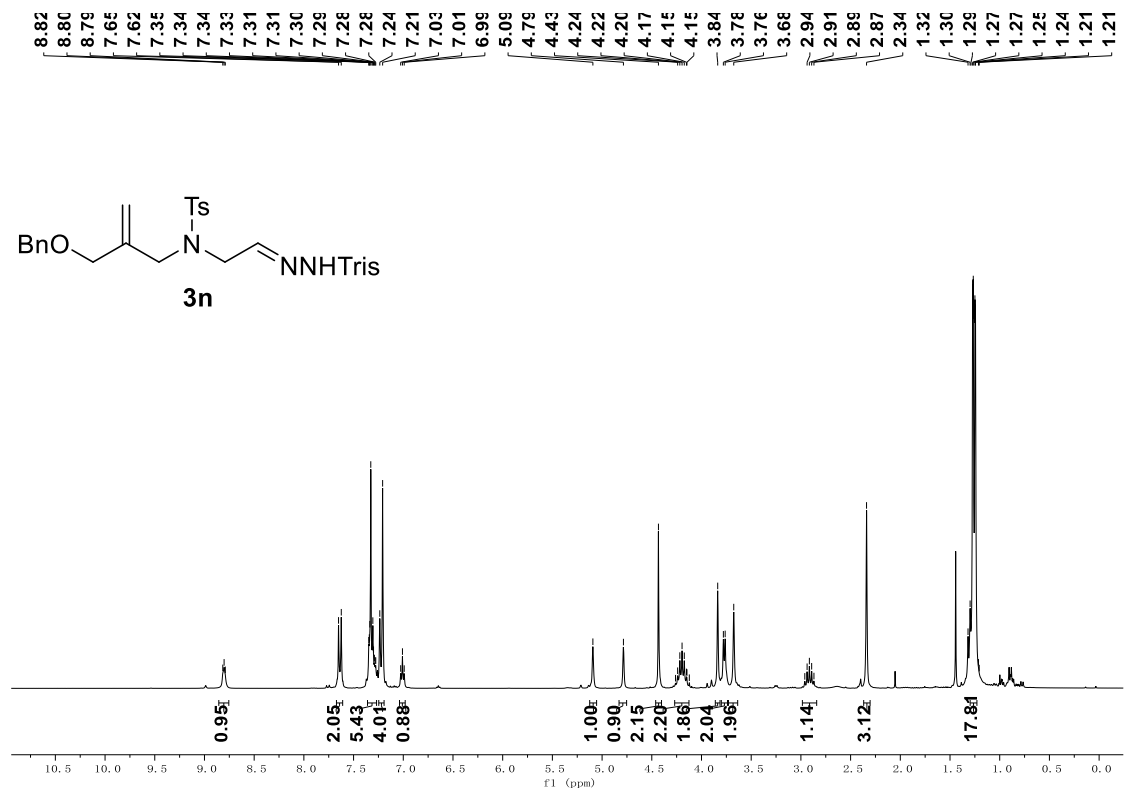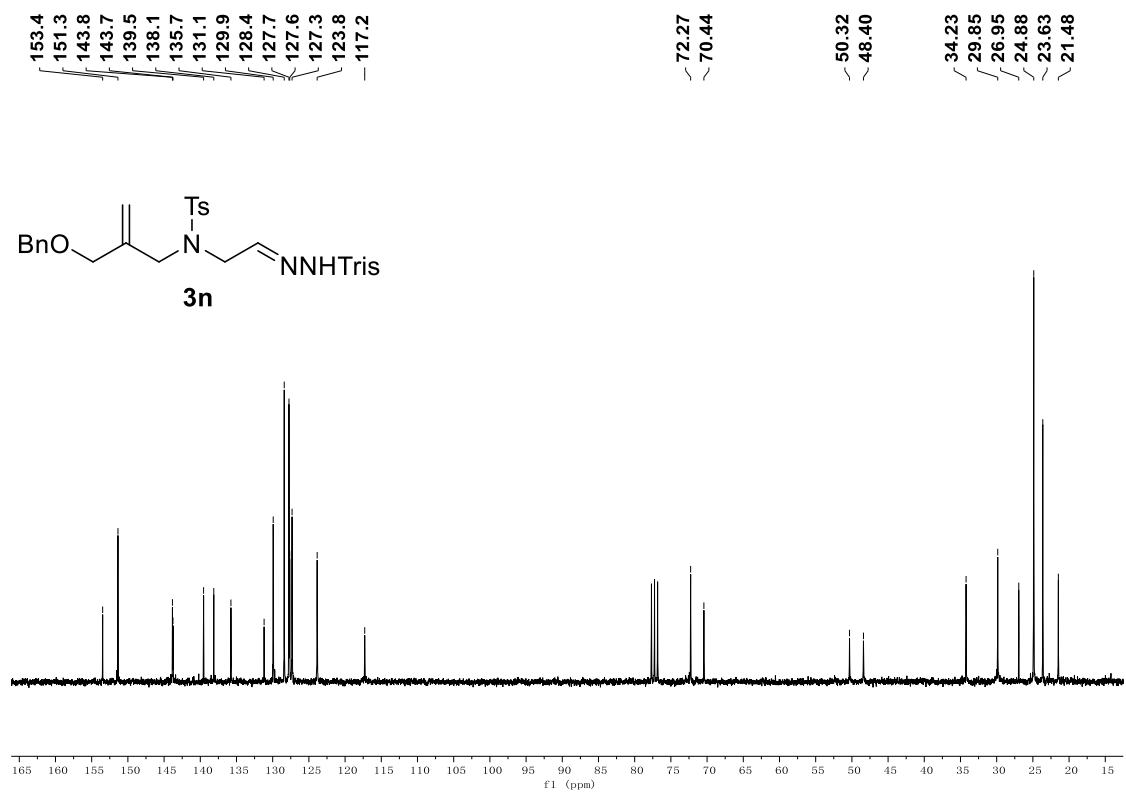

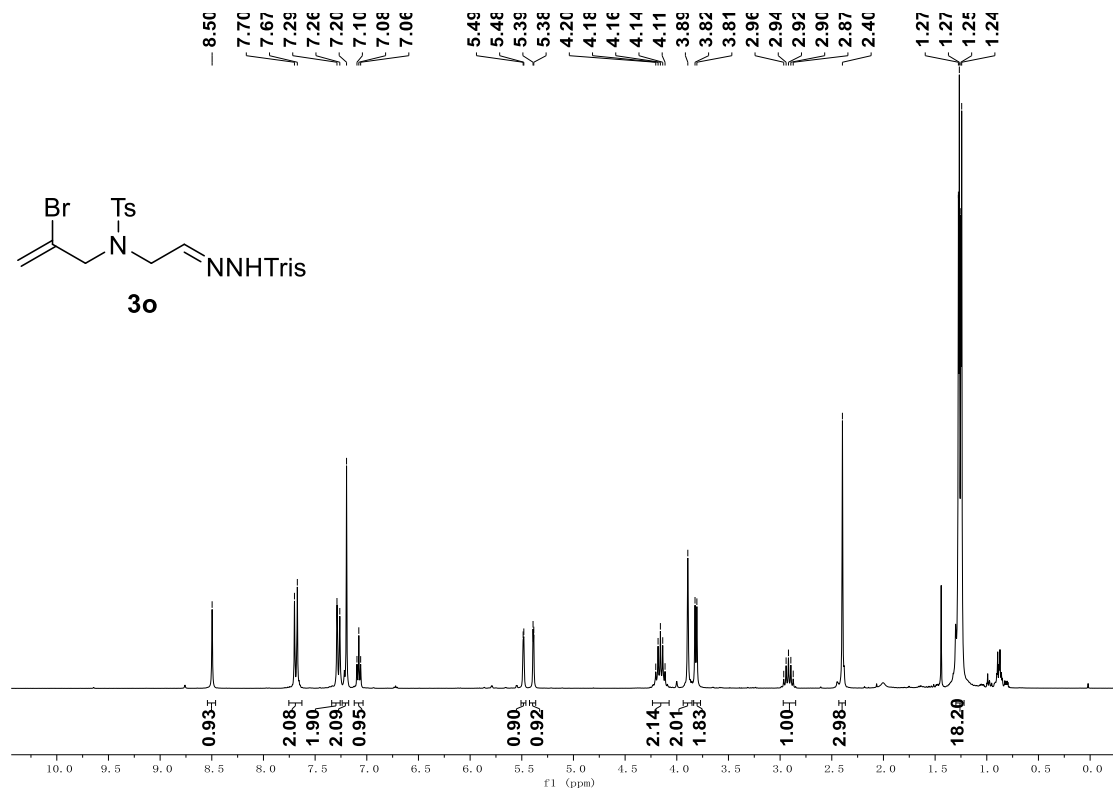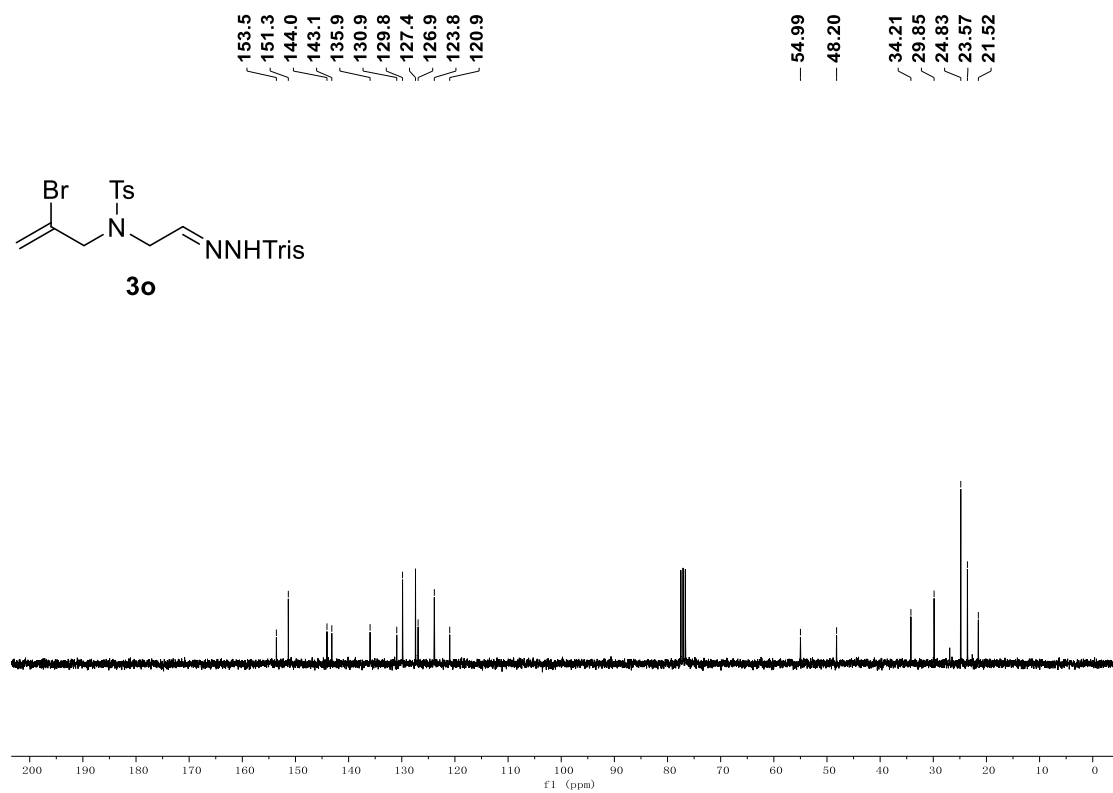

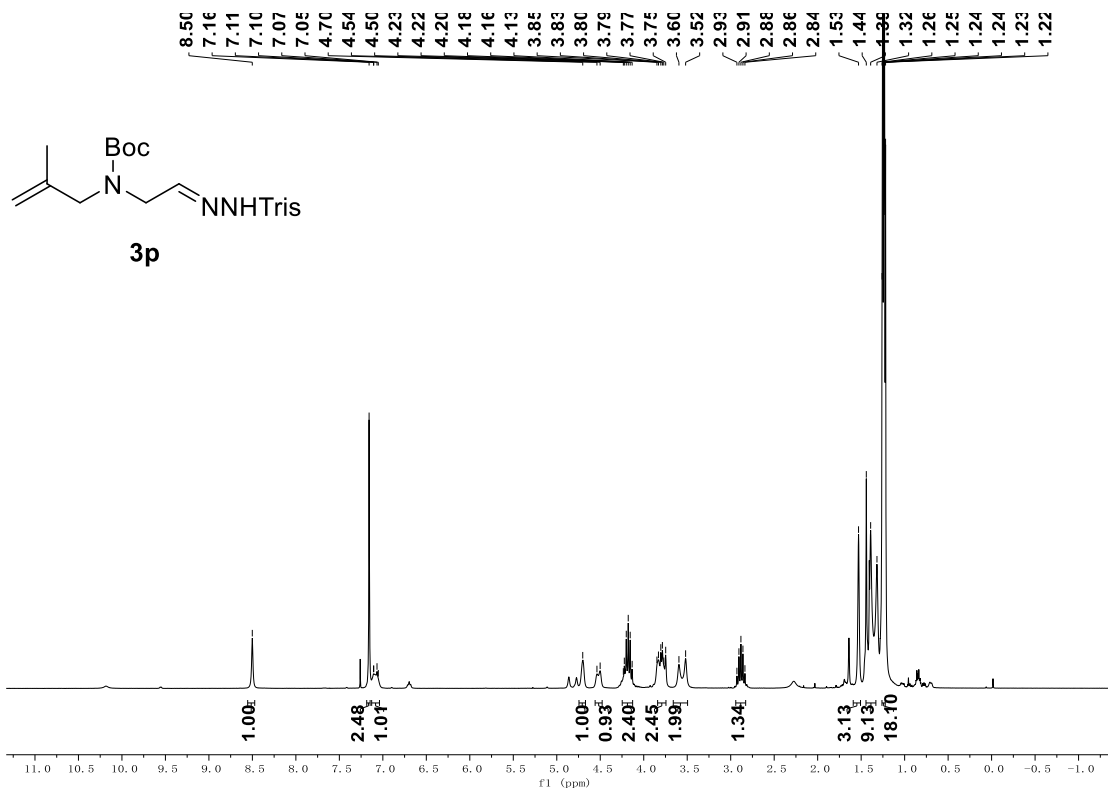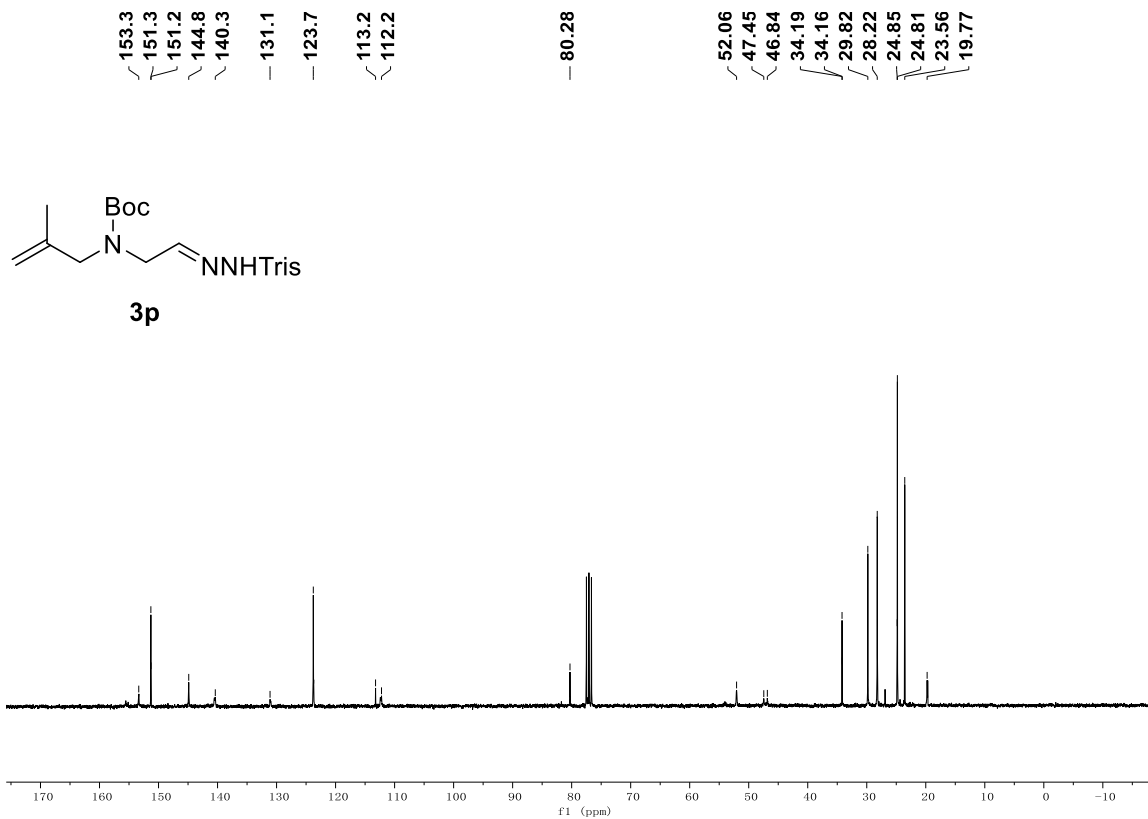

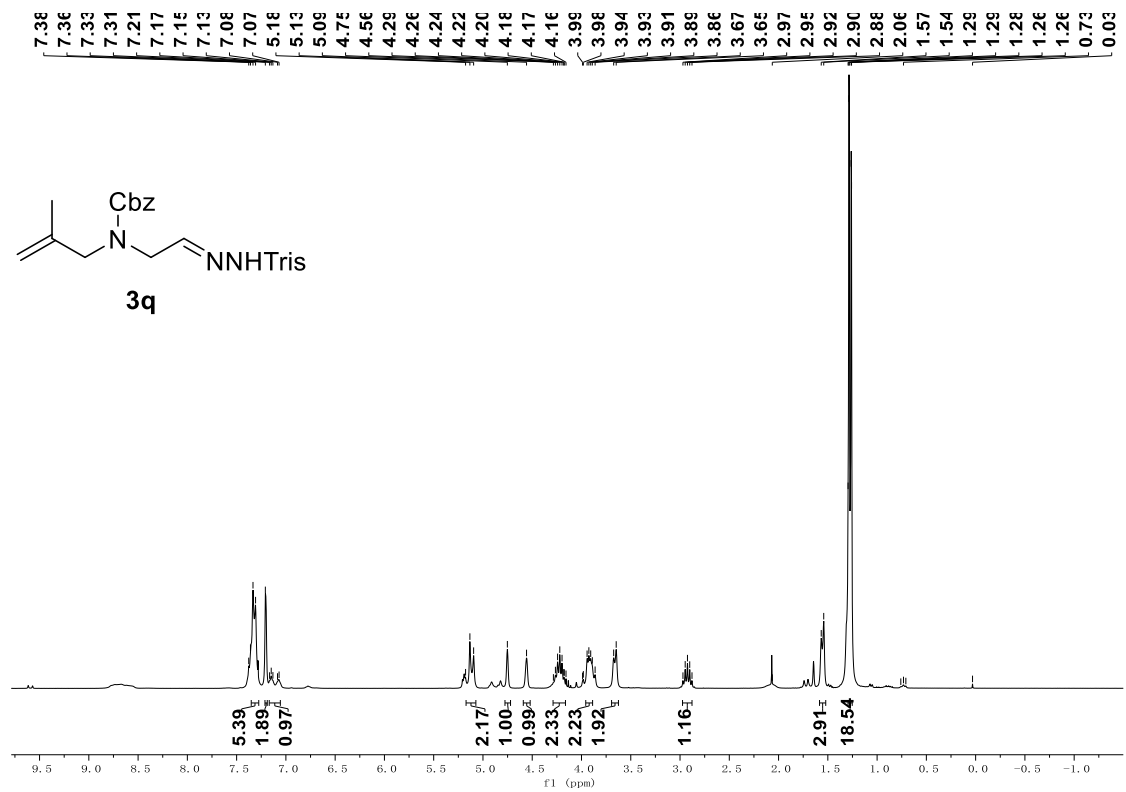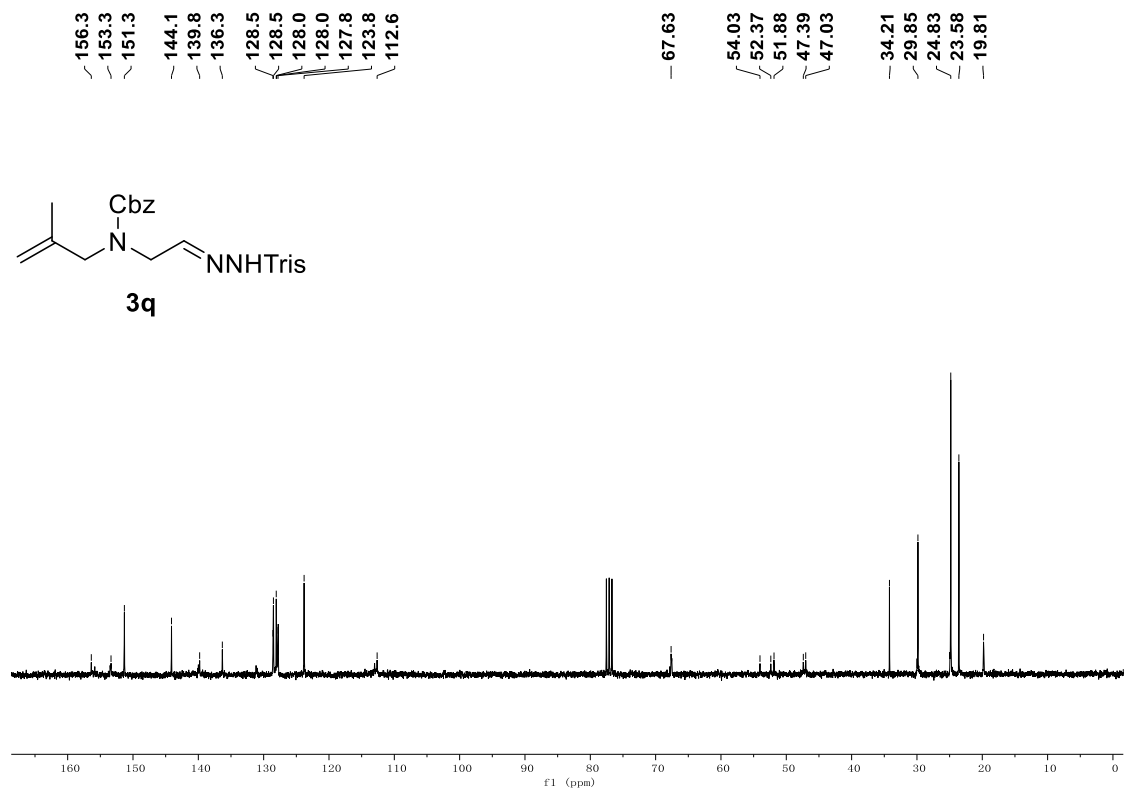

# NMR Spectra of products

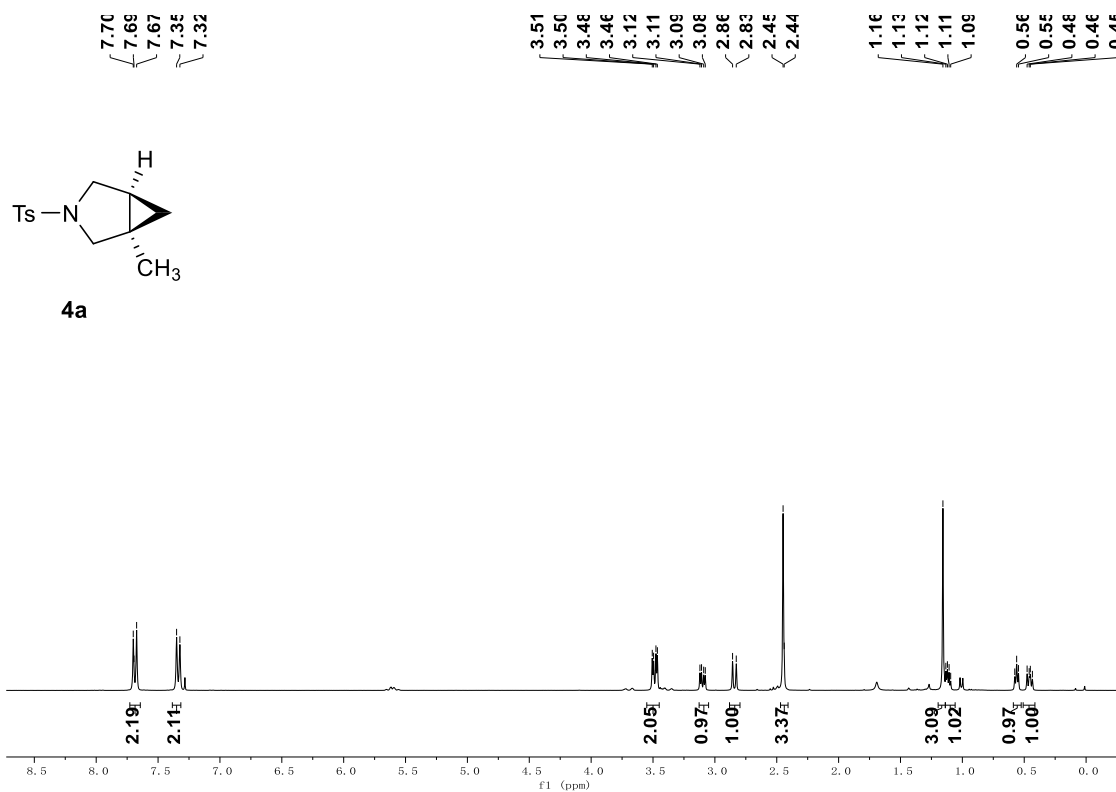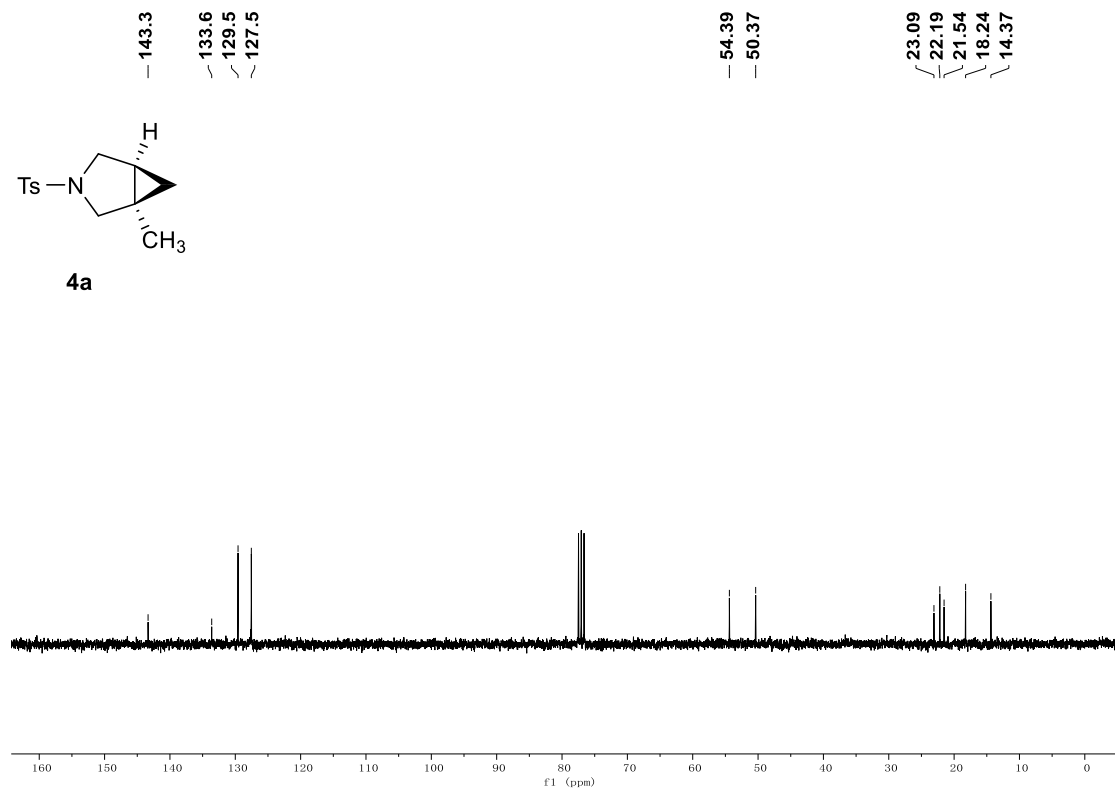



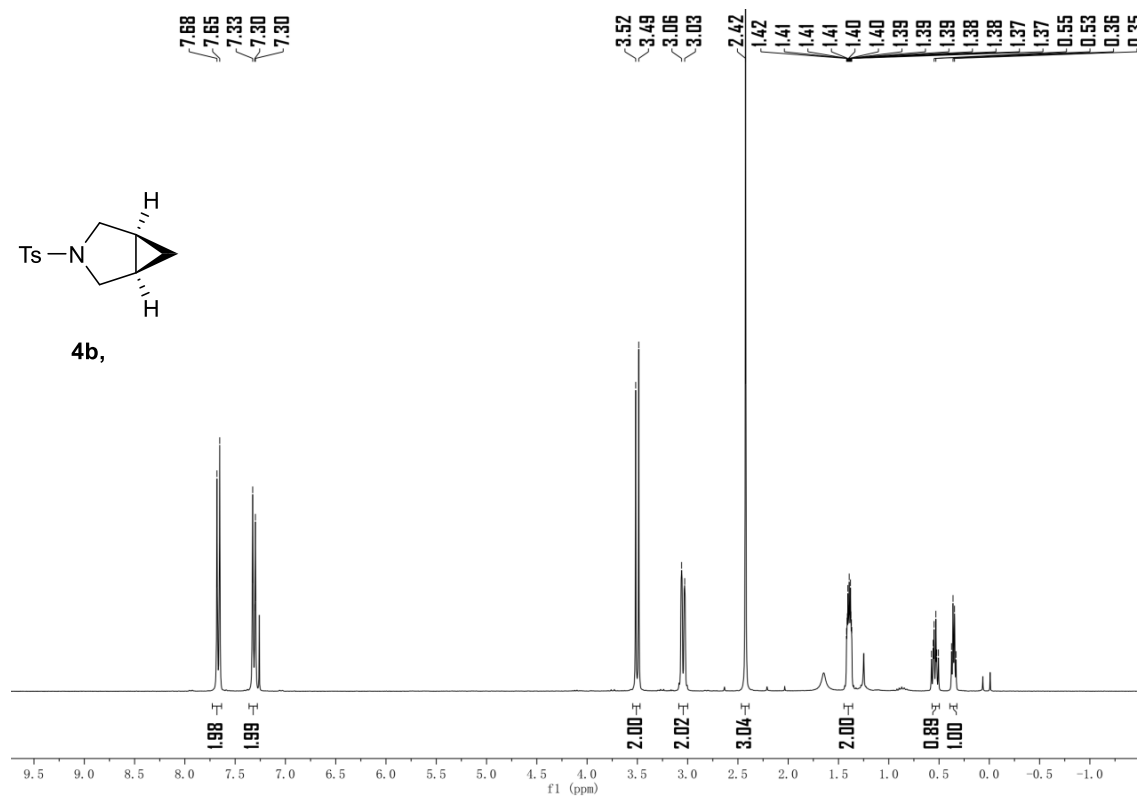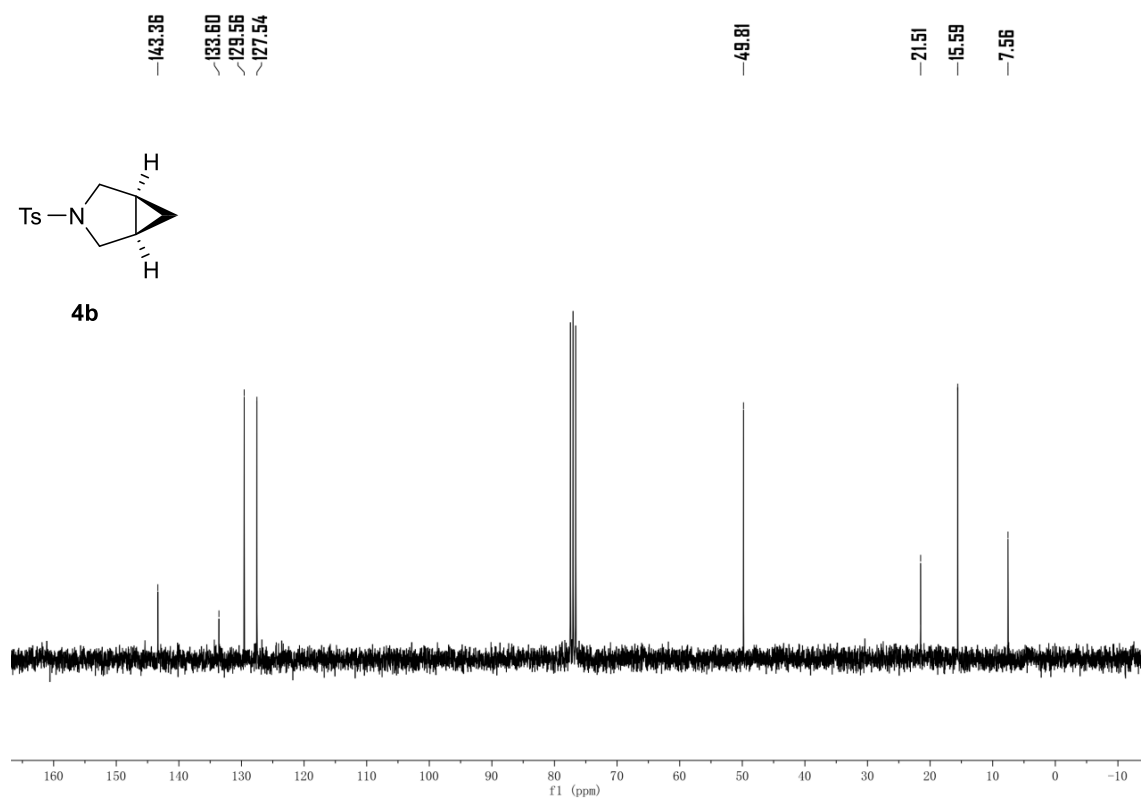

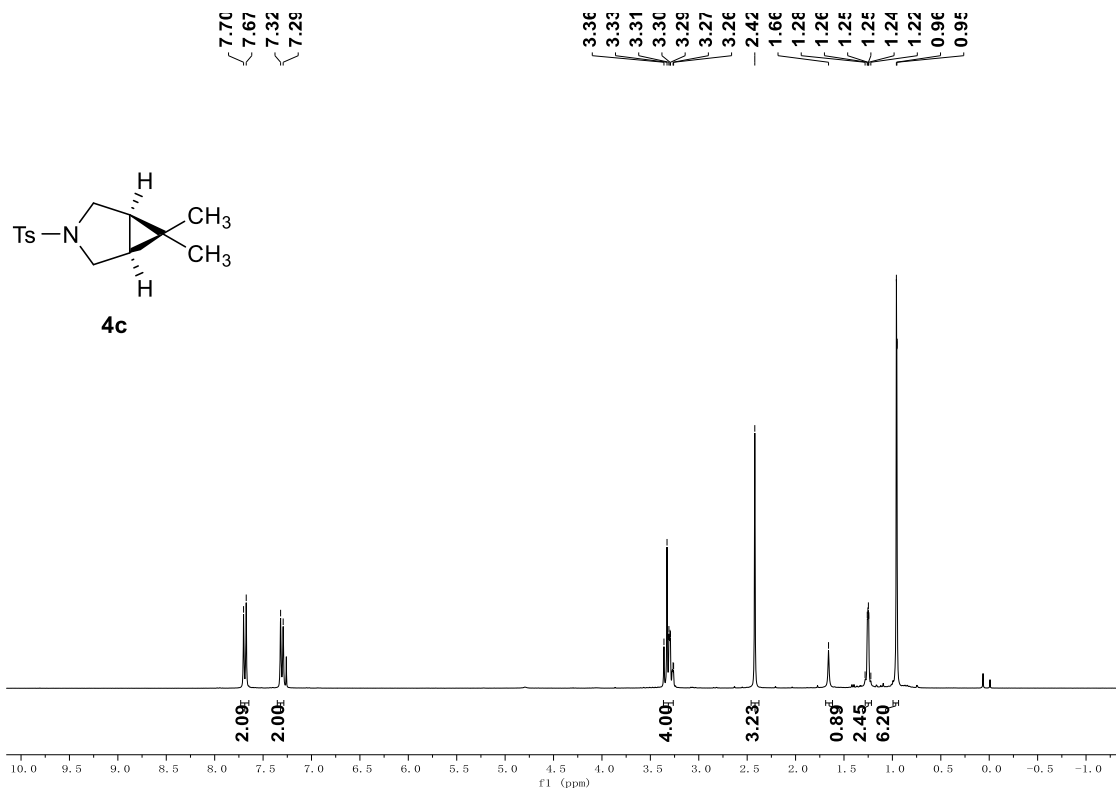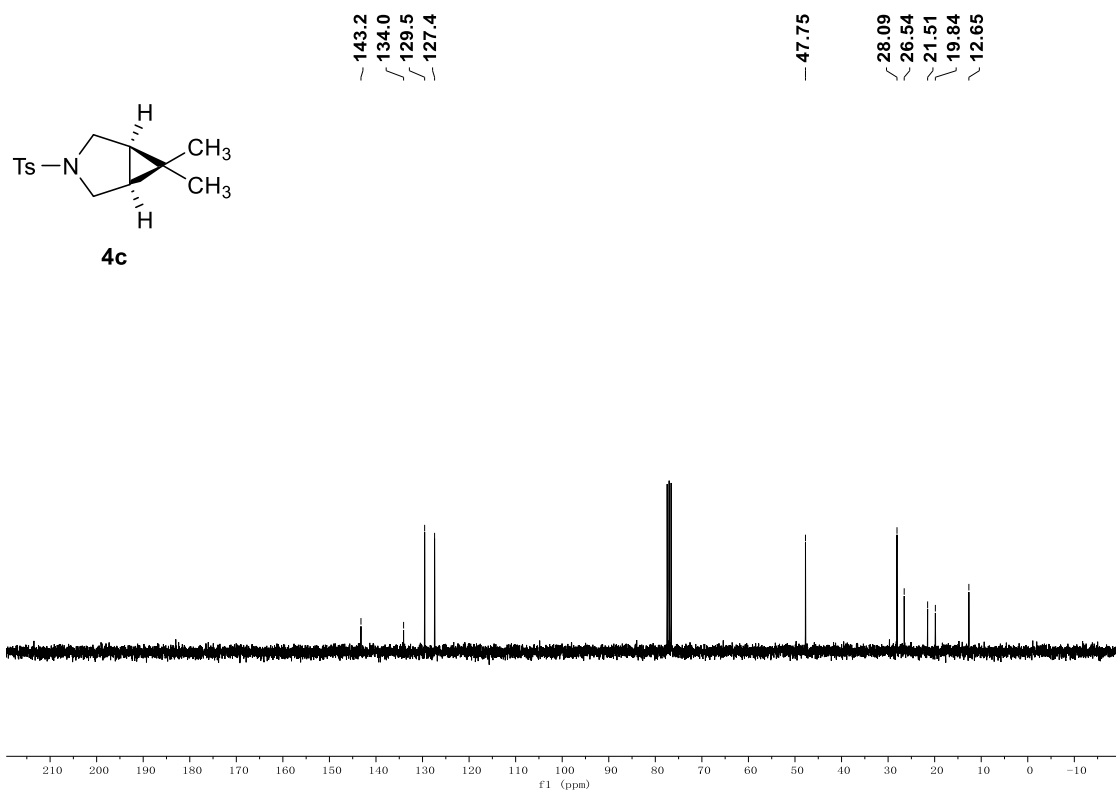

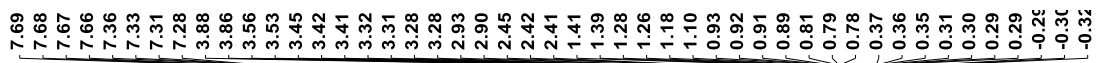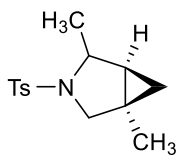

**4d**

a mixture of diastereoisomers in dr = 1:1

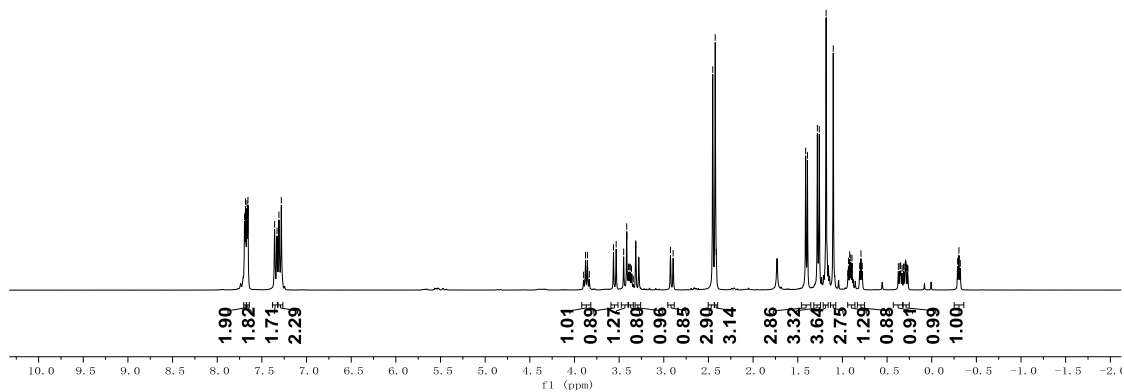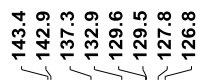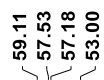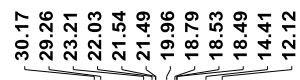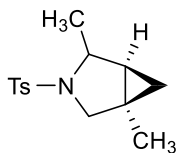

**4d**

a mixture of diastereoisomers in dr = 1:1

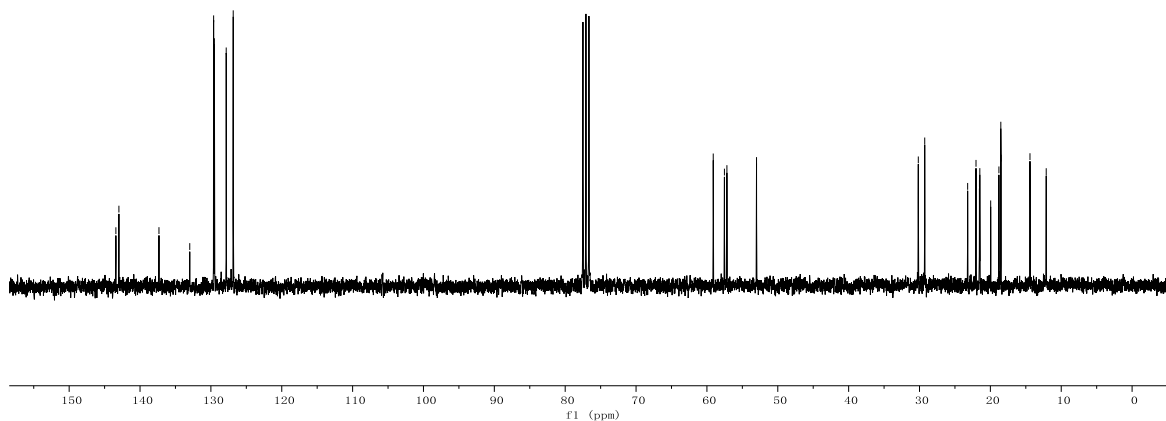

7.74  
7.71  
7.37  
7.35  
7.24  
7.23  
7.22  
7.21  
7.18  
7.17  
7.17  
7.16  
7.15  
7.13  
6.95  
6.93  
6.92

3.73  
3.70  
3.20  
3.18  
3.17  
3.16  
3.16  
2.46  
1.88  
1.86  
1.86  
1.74  
1.73  
1.73  
1.72  
1.71

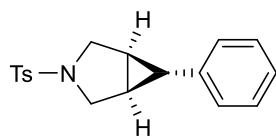

4e

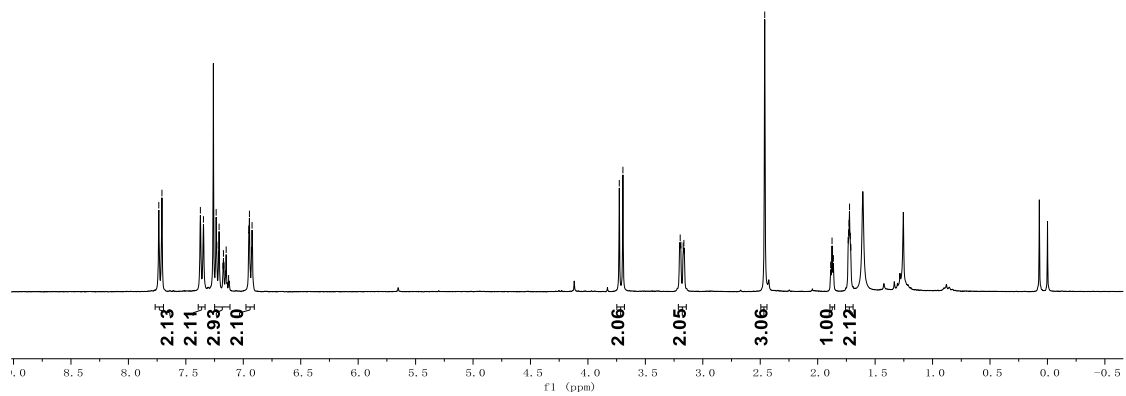

143.6  
140.4  
133.3  
129.7  
128.4  
127.6  
125.9  
125.6

50.29

26.57  
25.04  
21.57

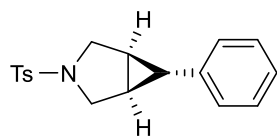

4e

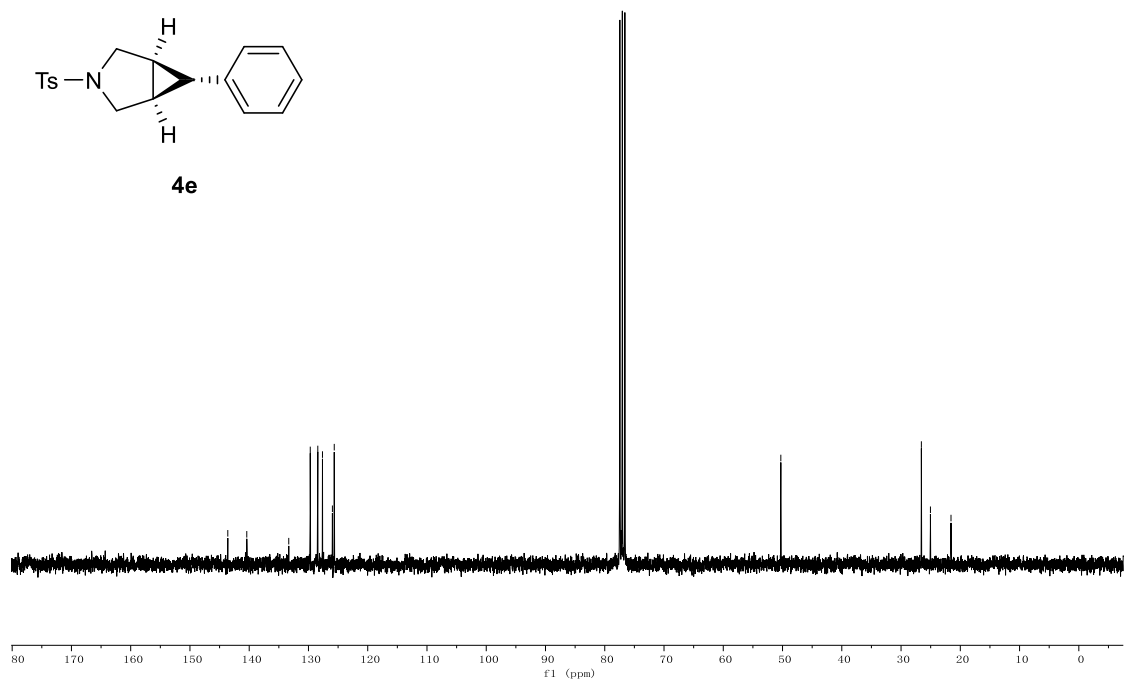

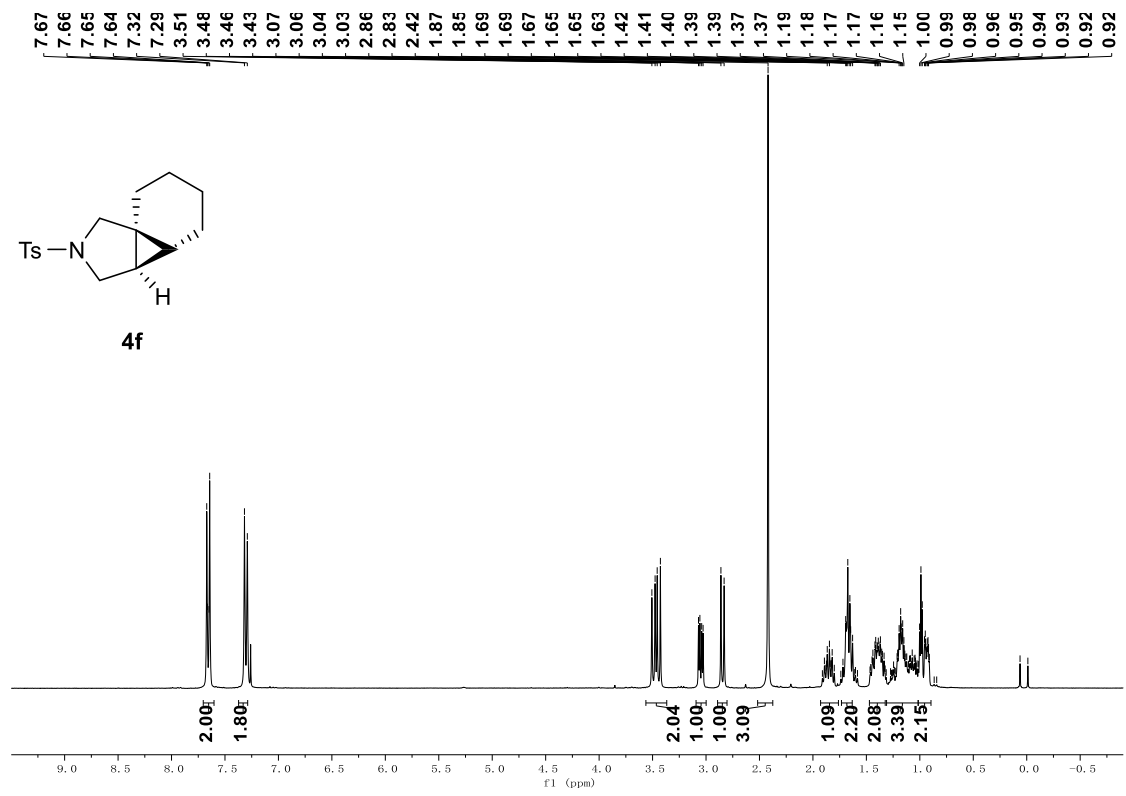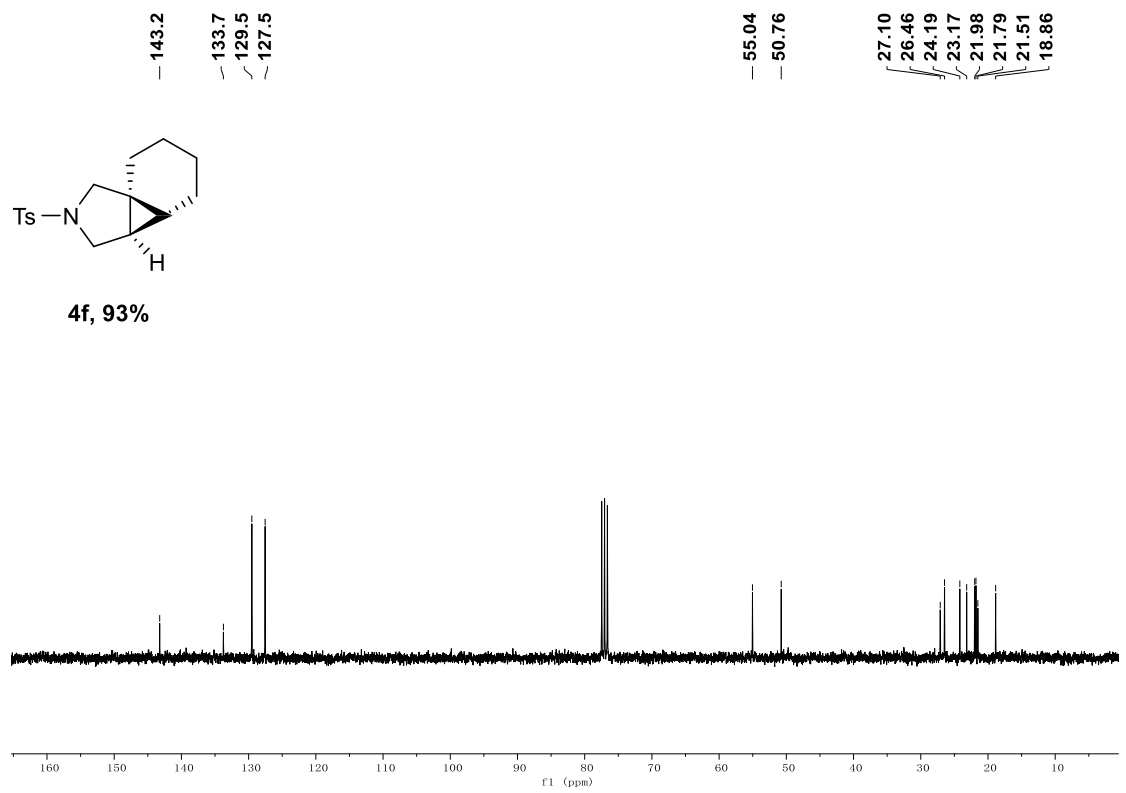

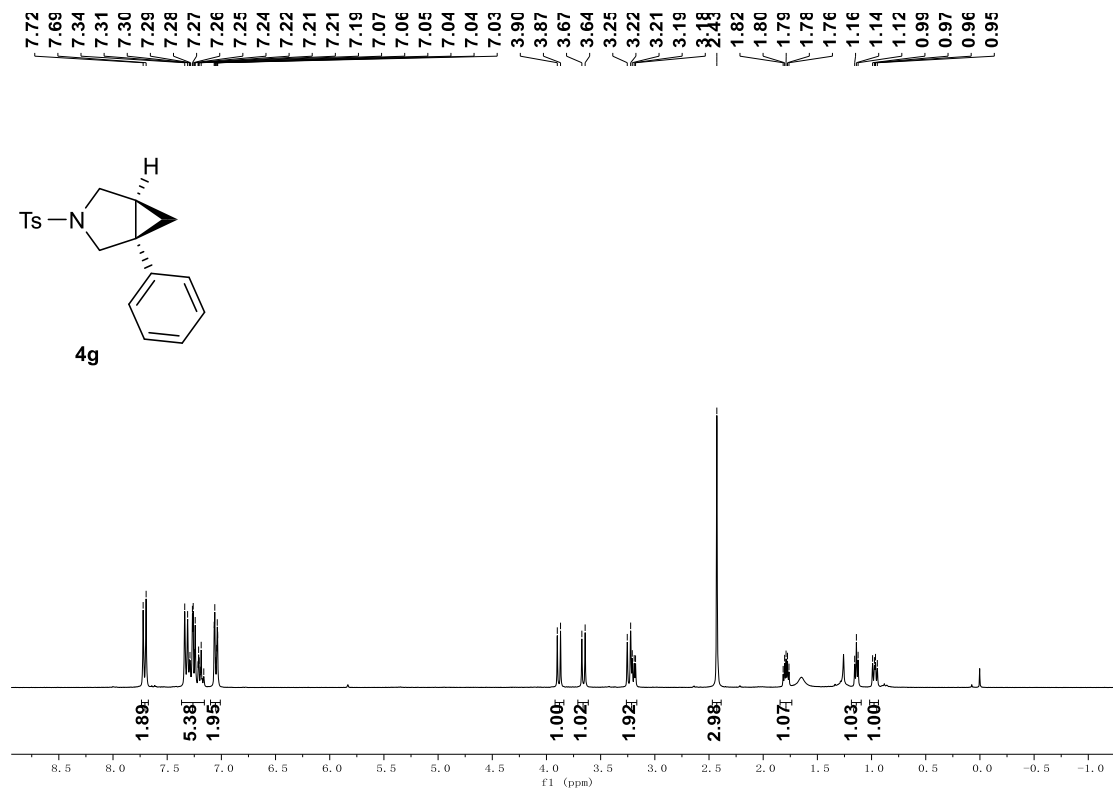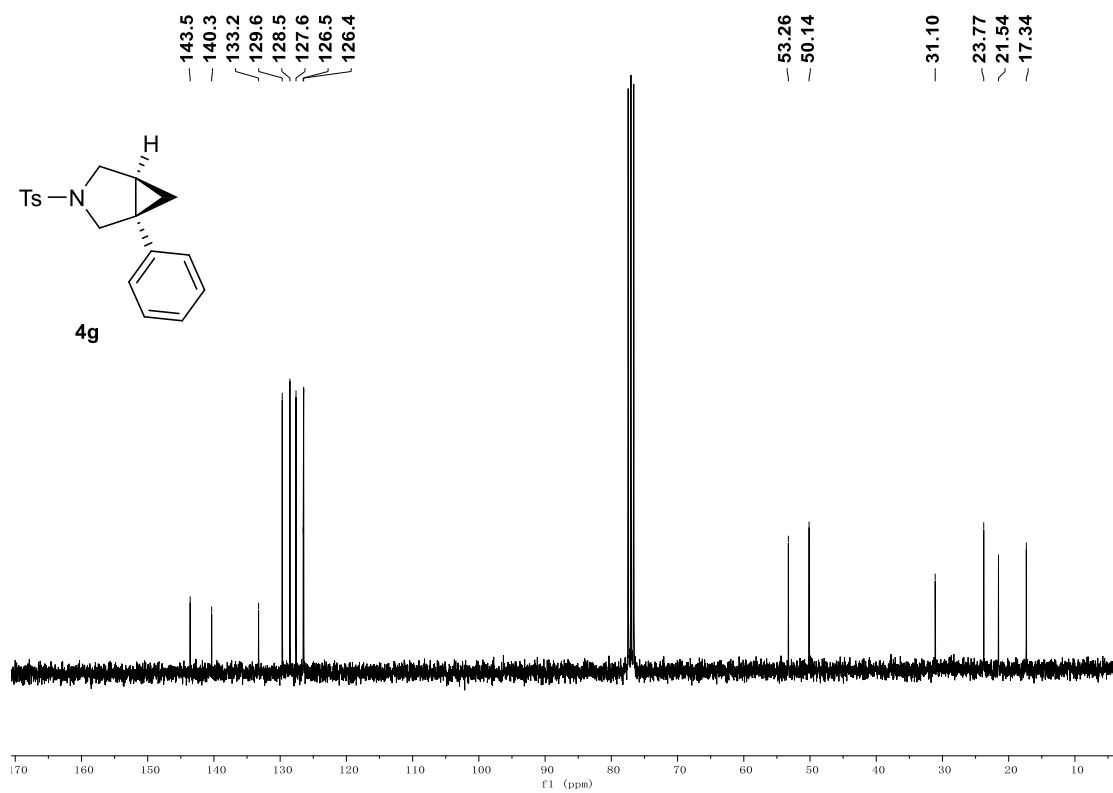

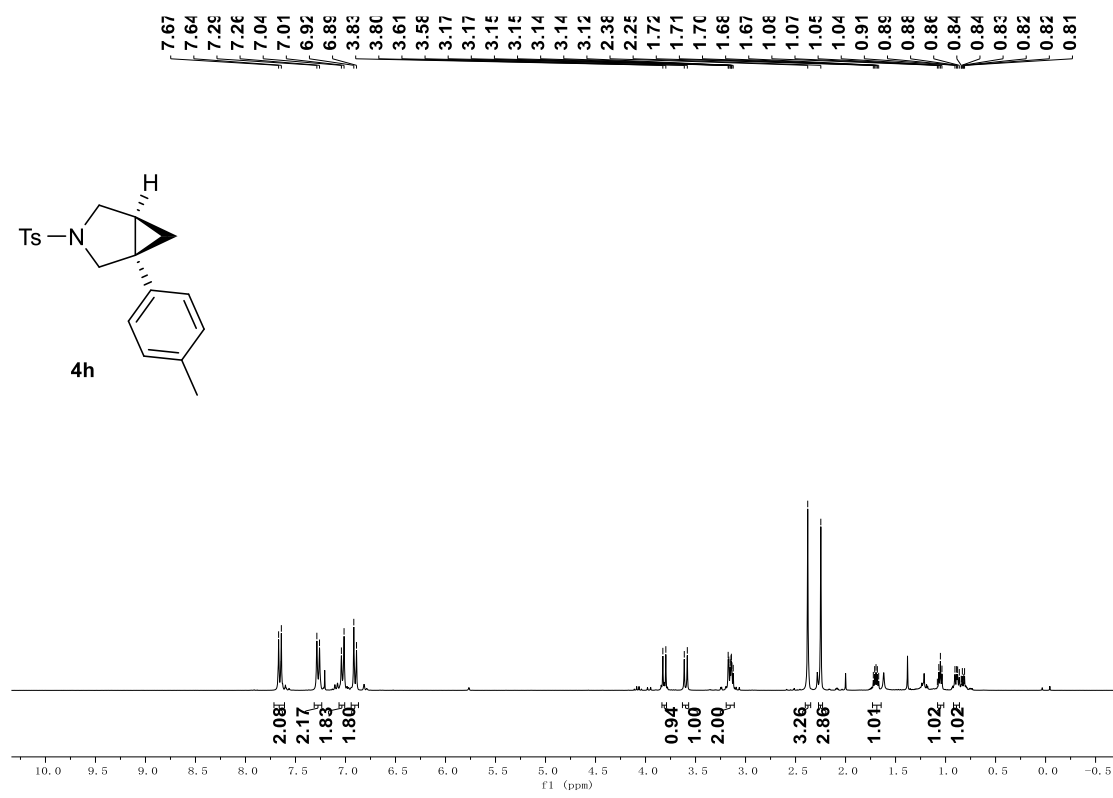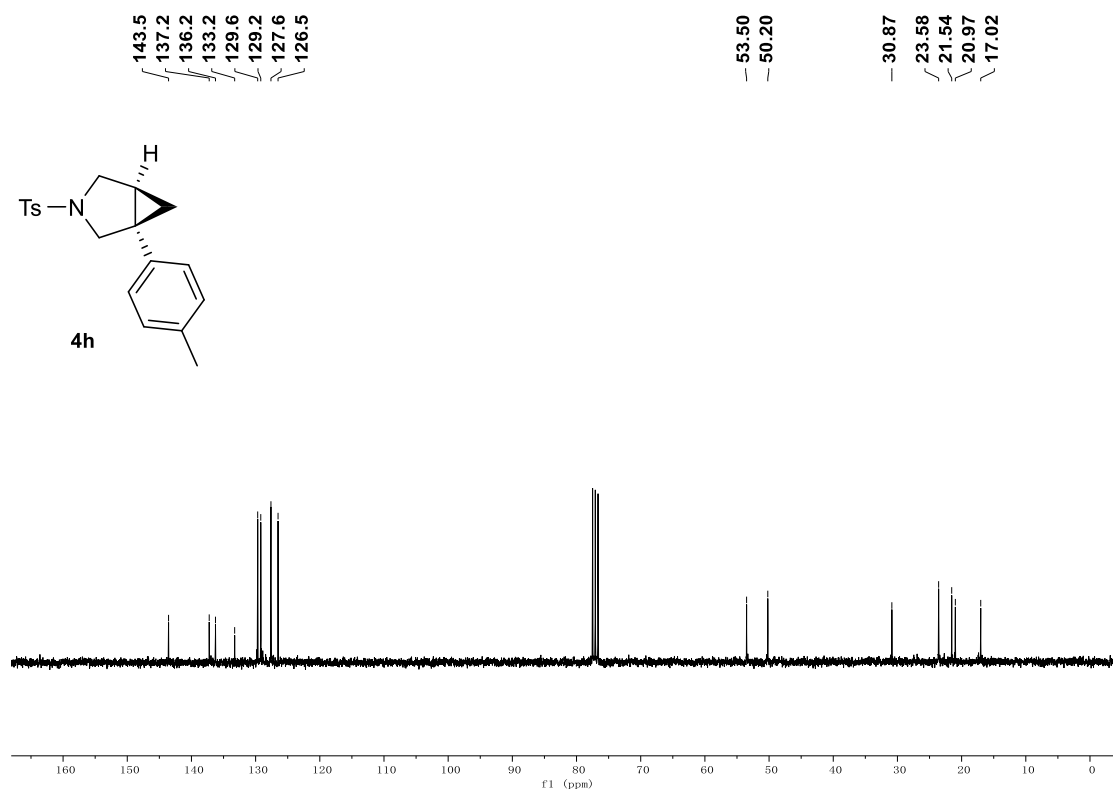

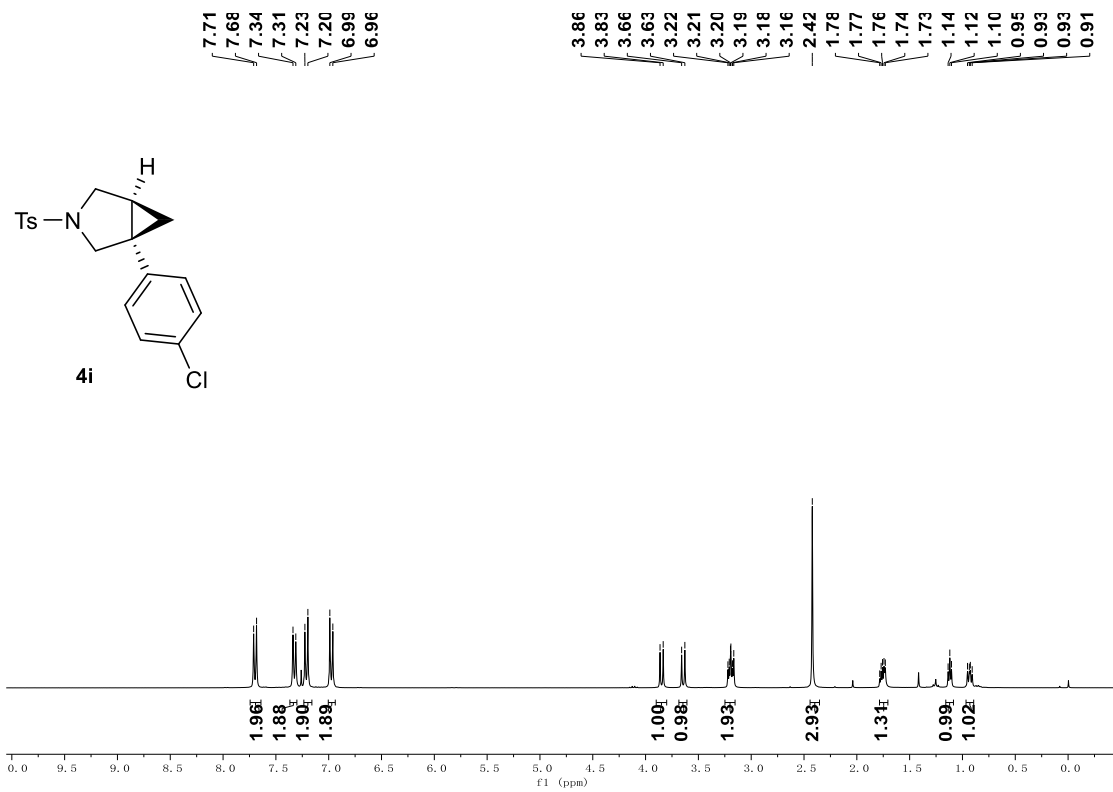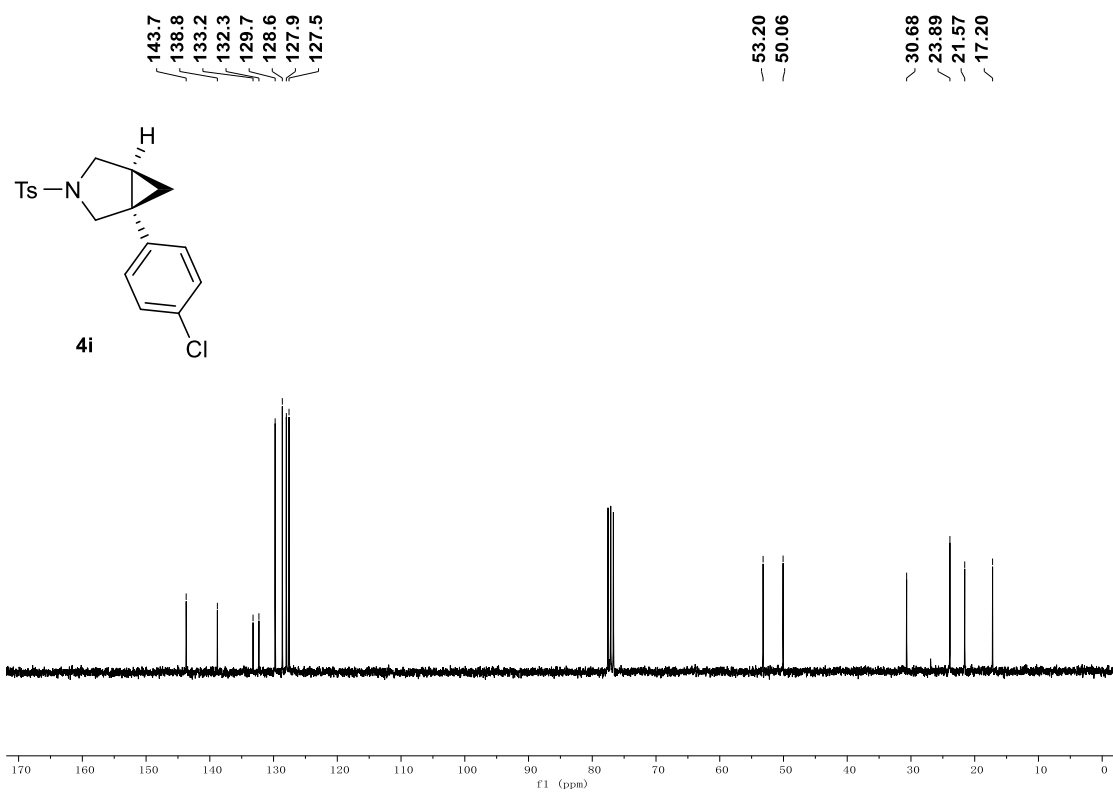



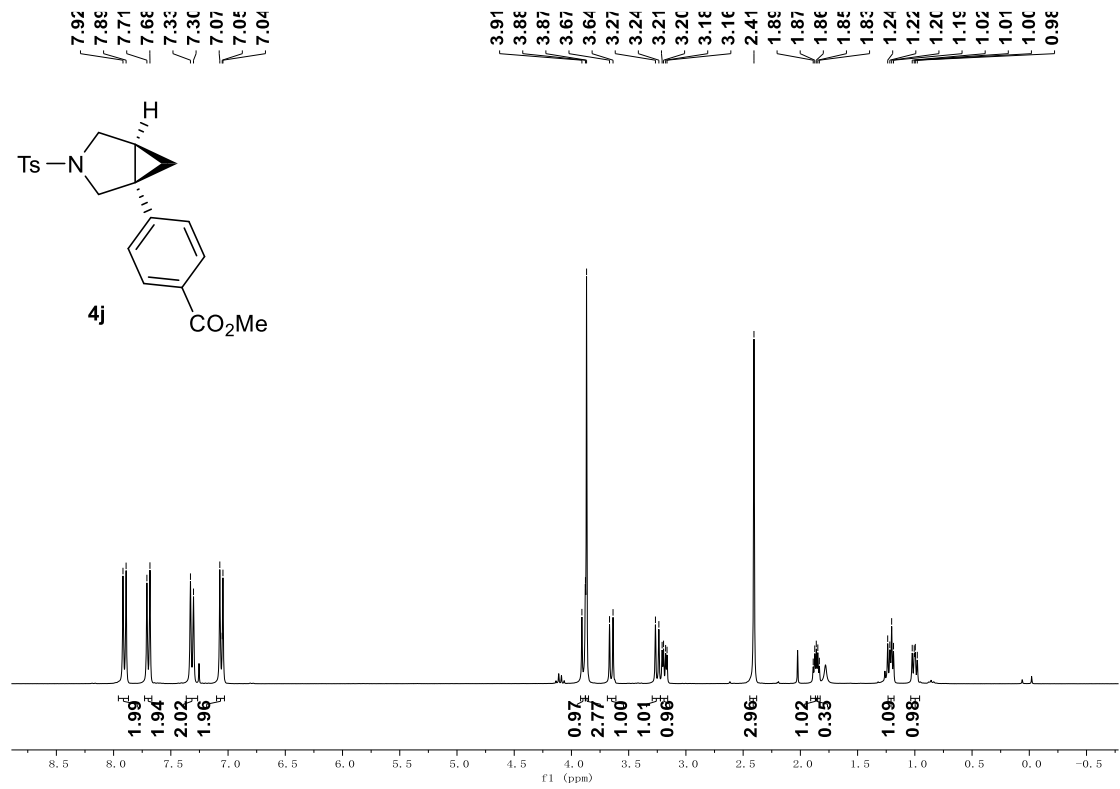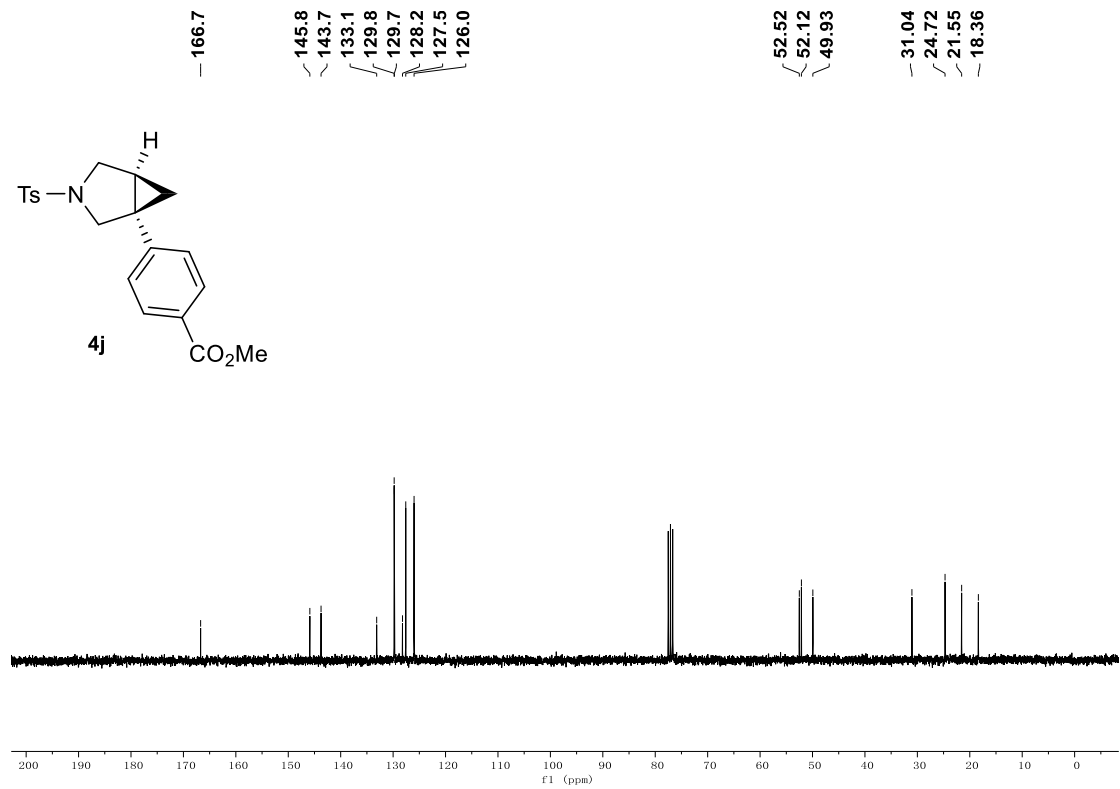

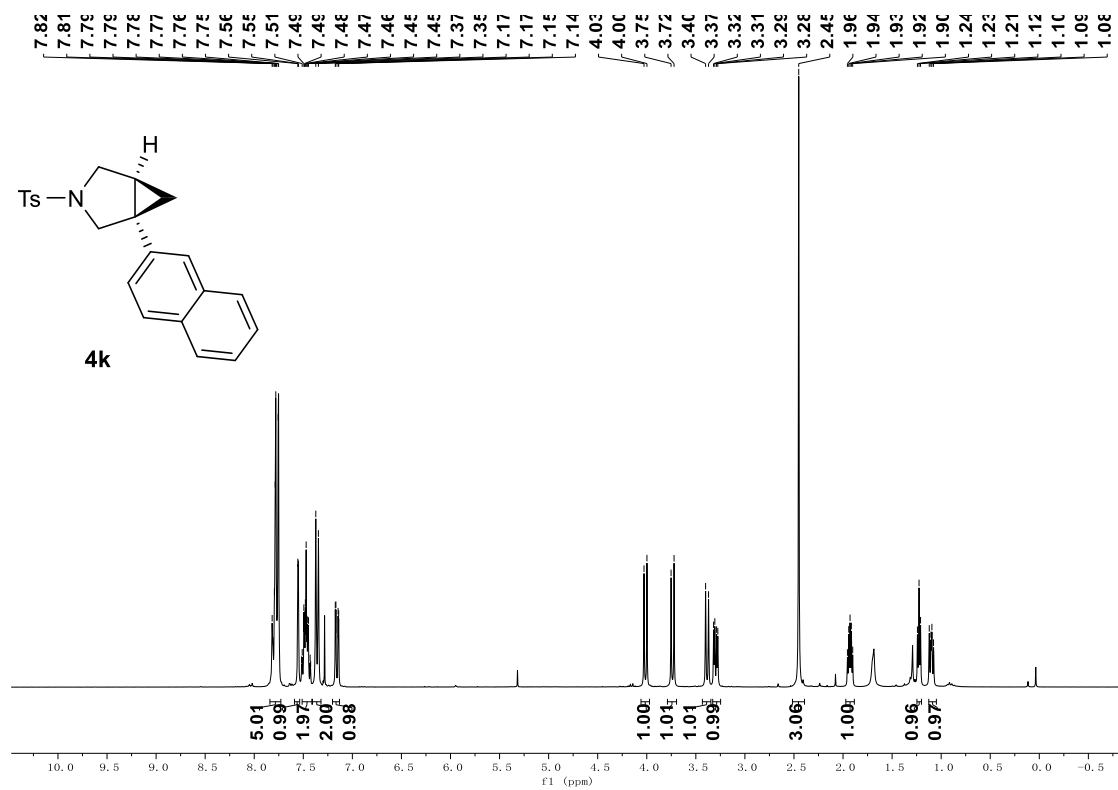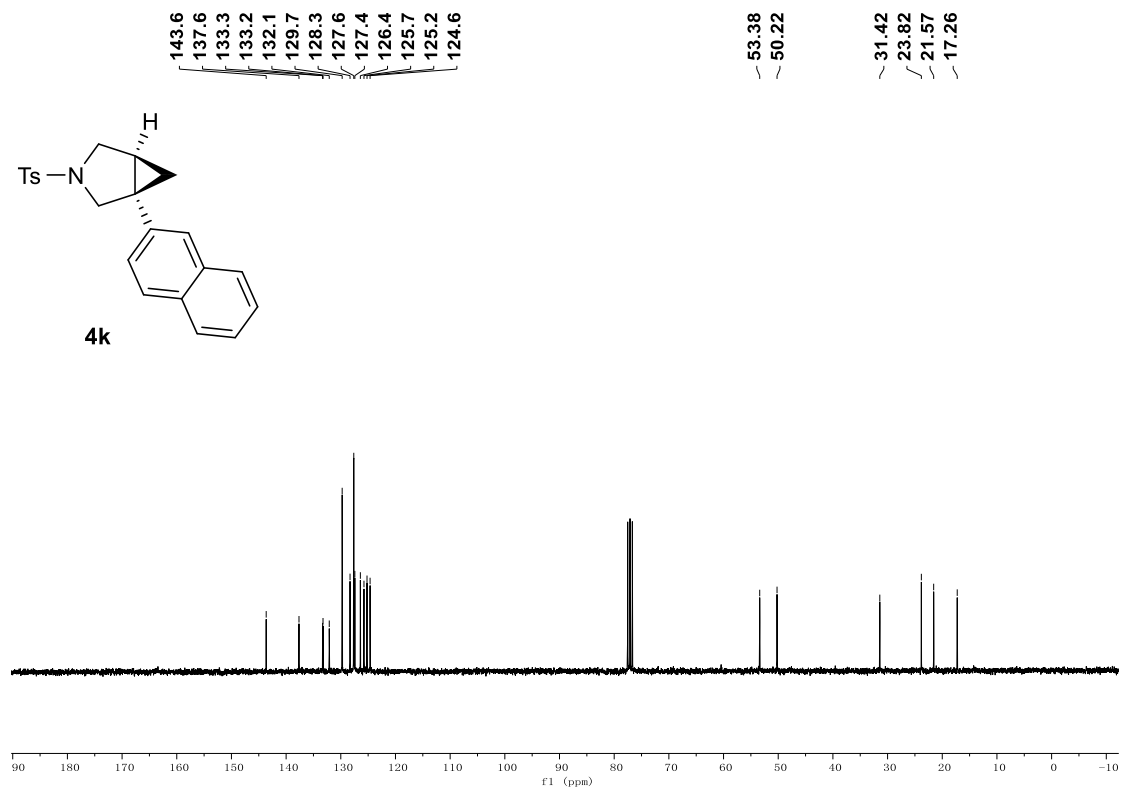

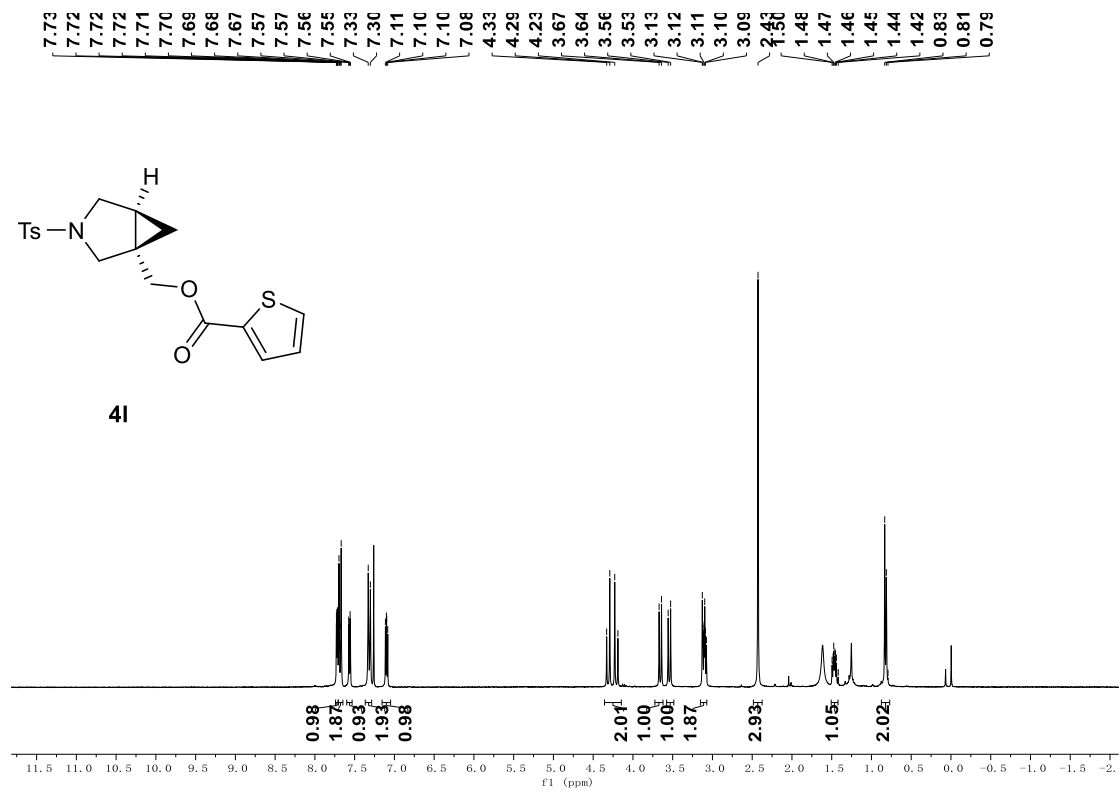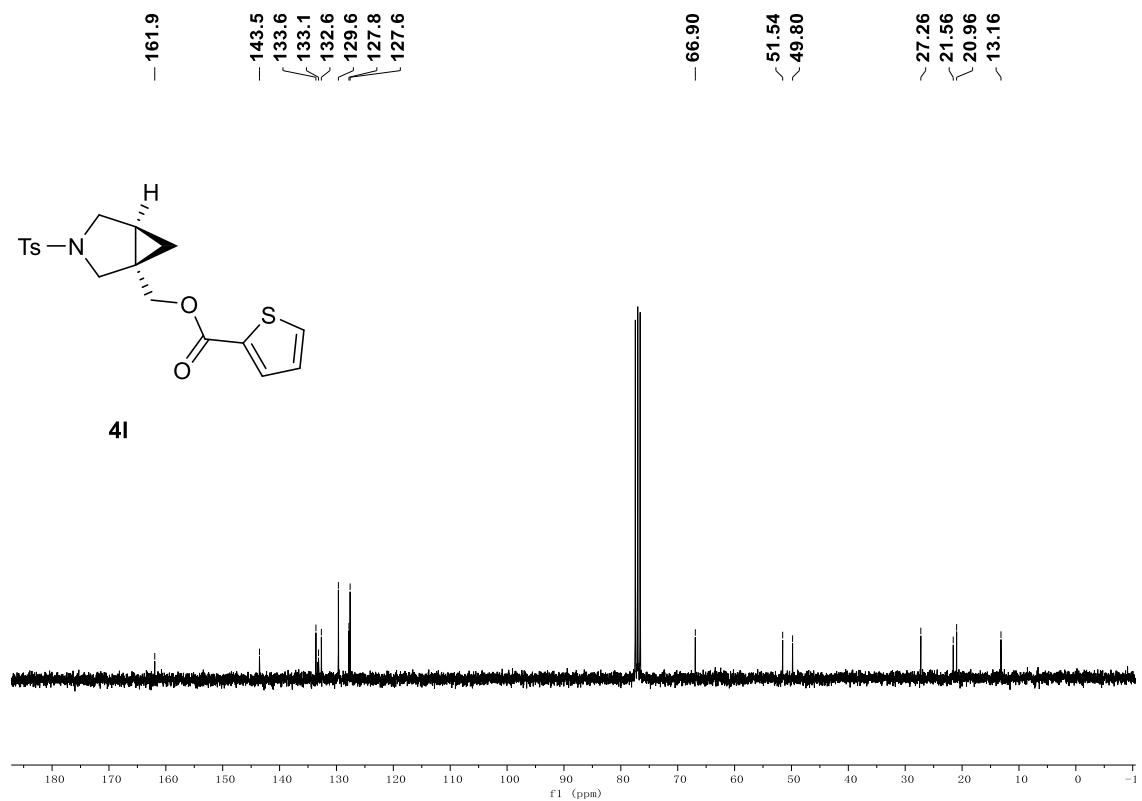

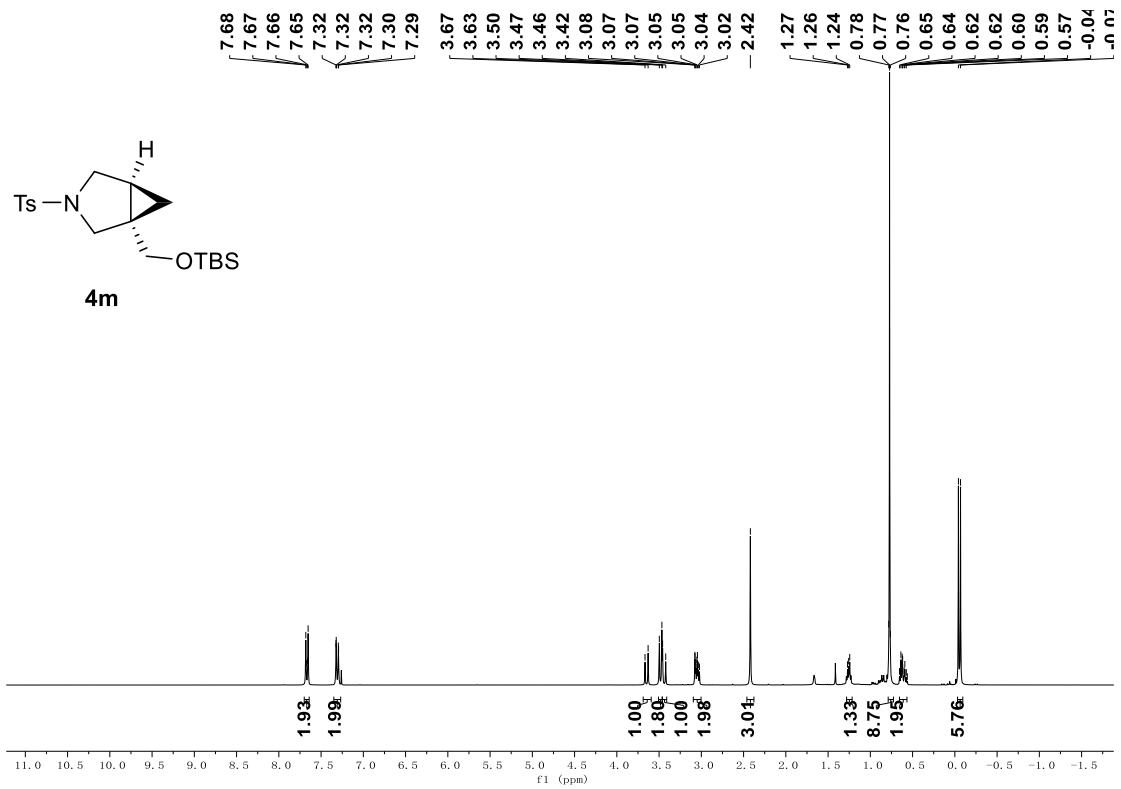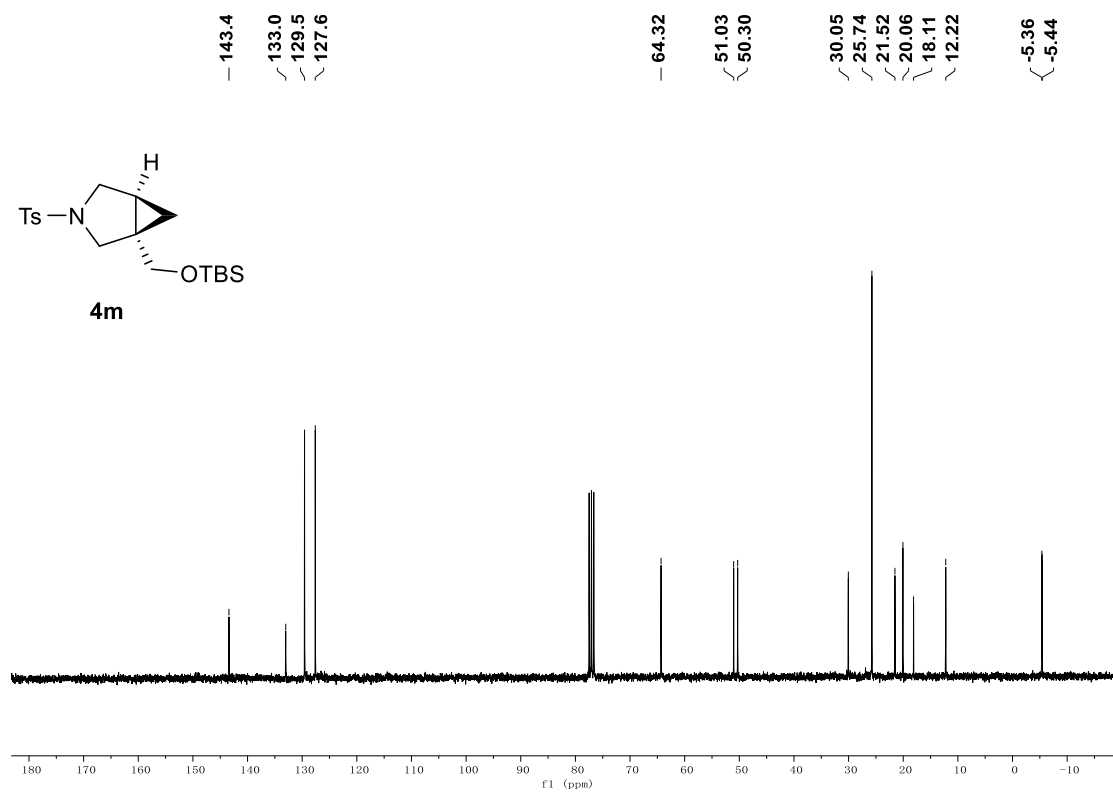

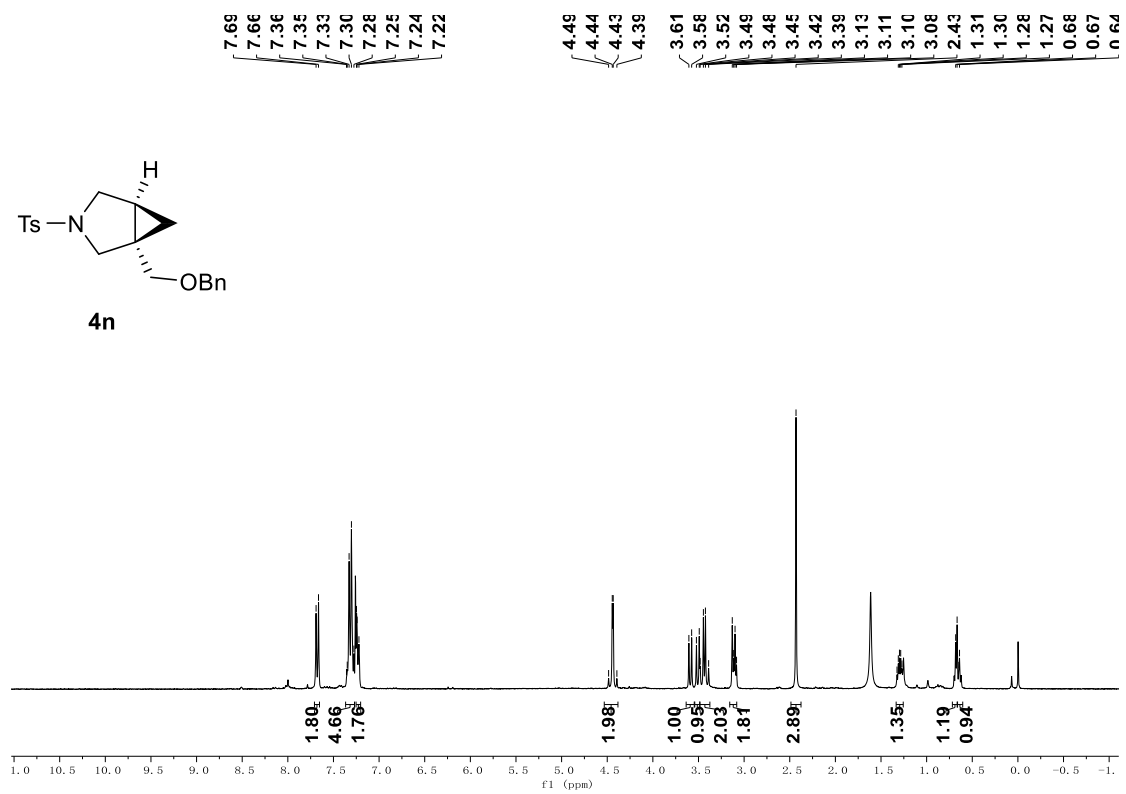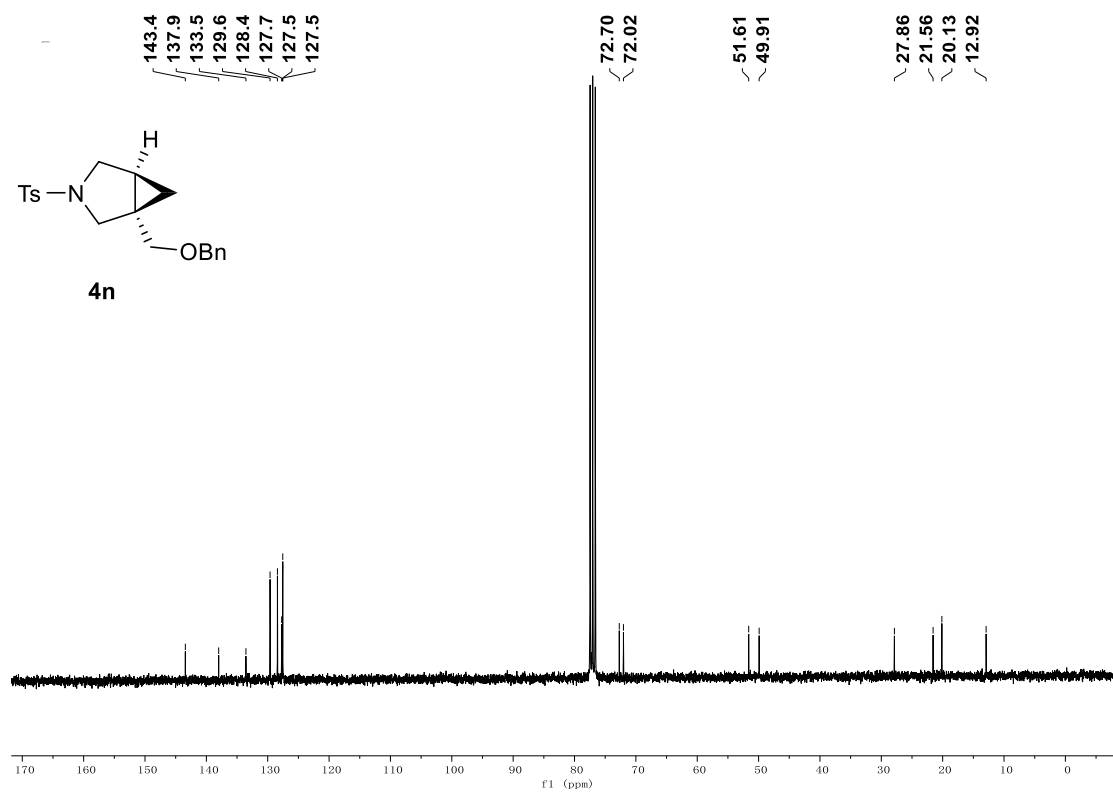

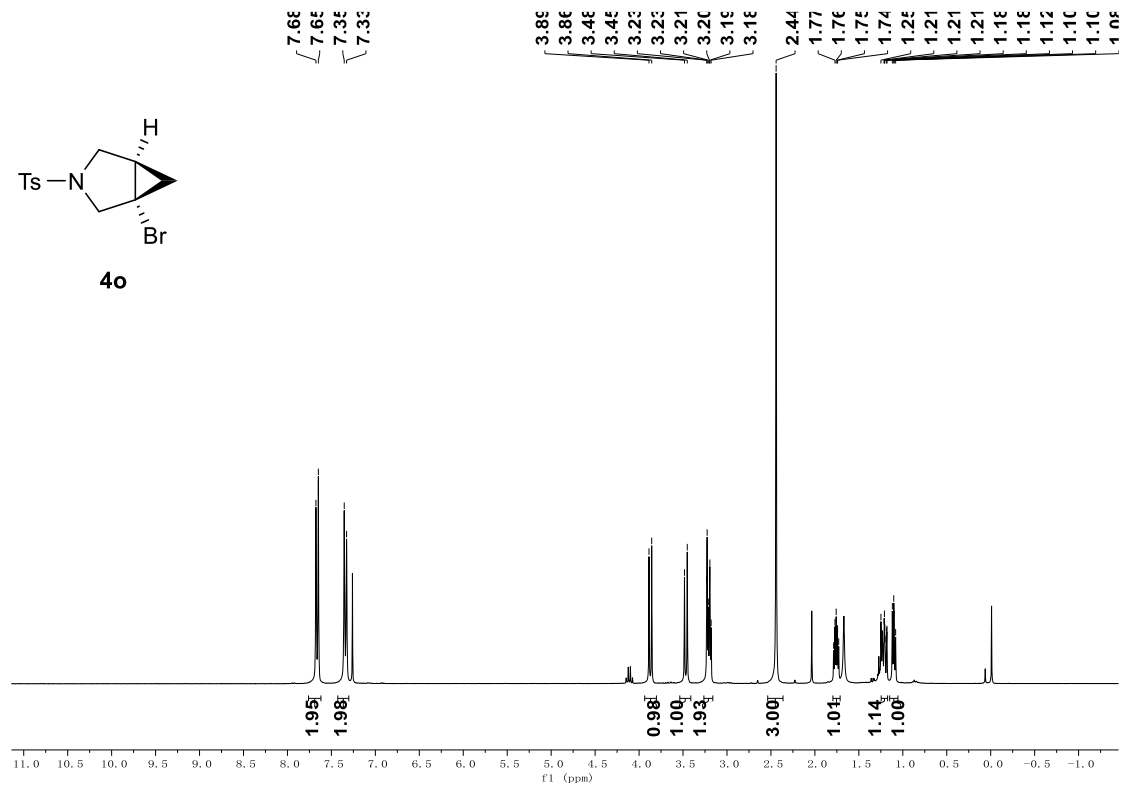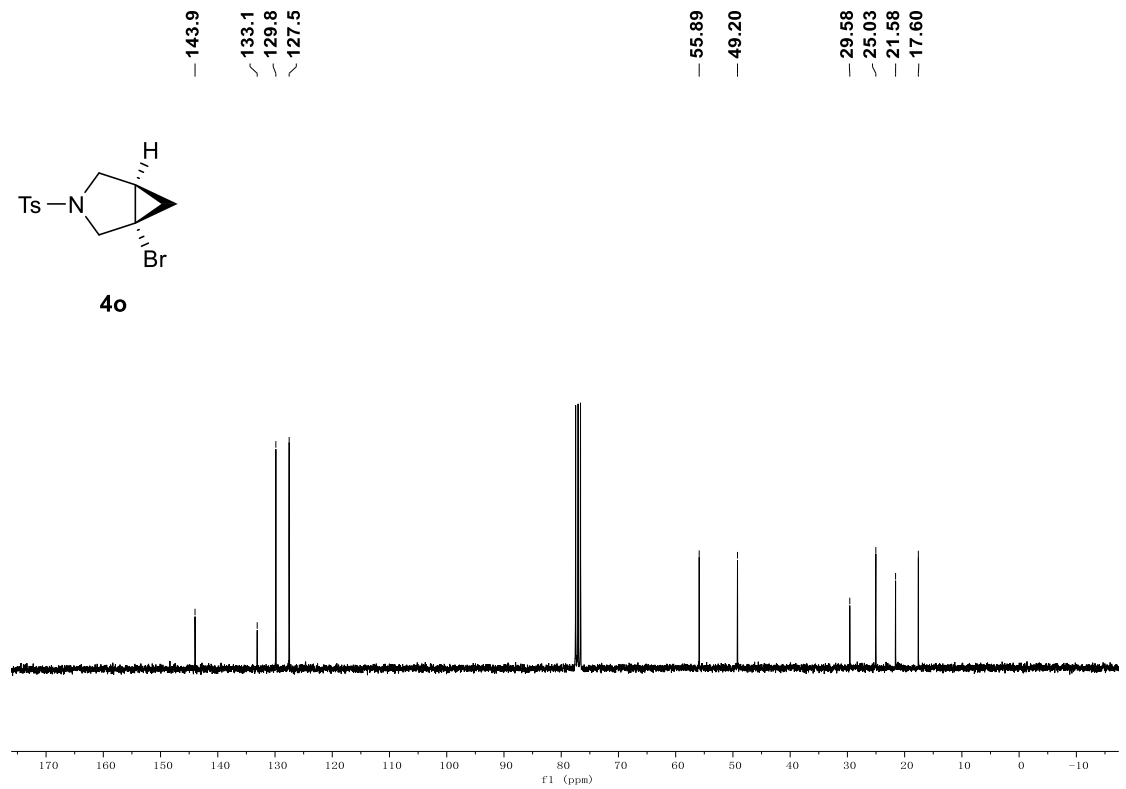

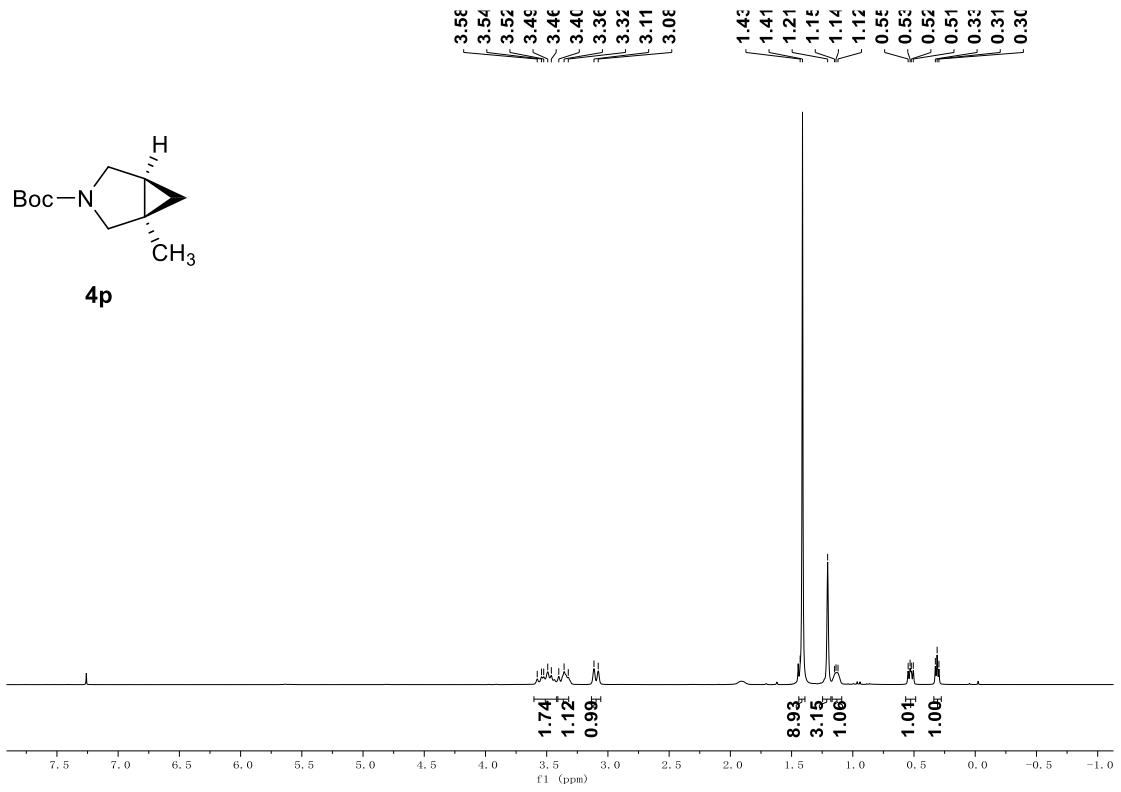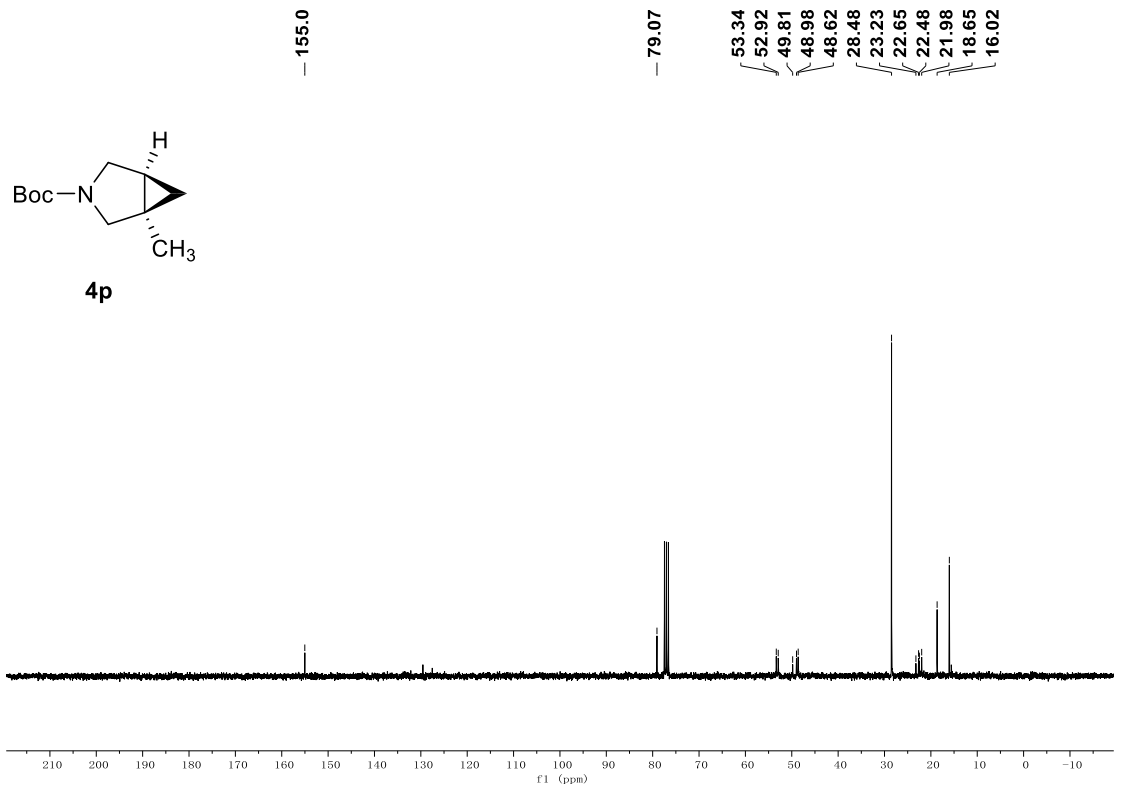

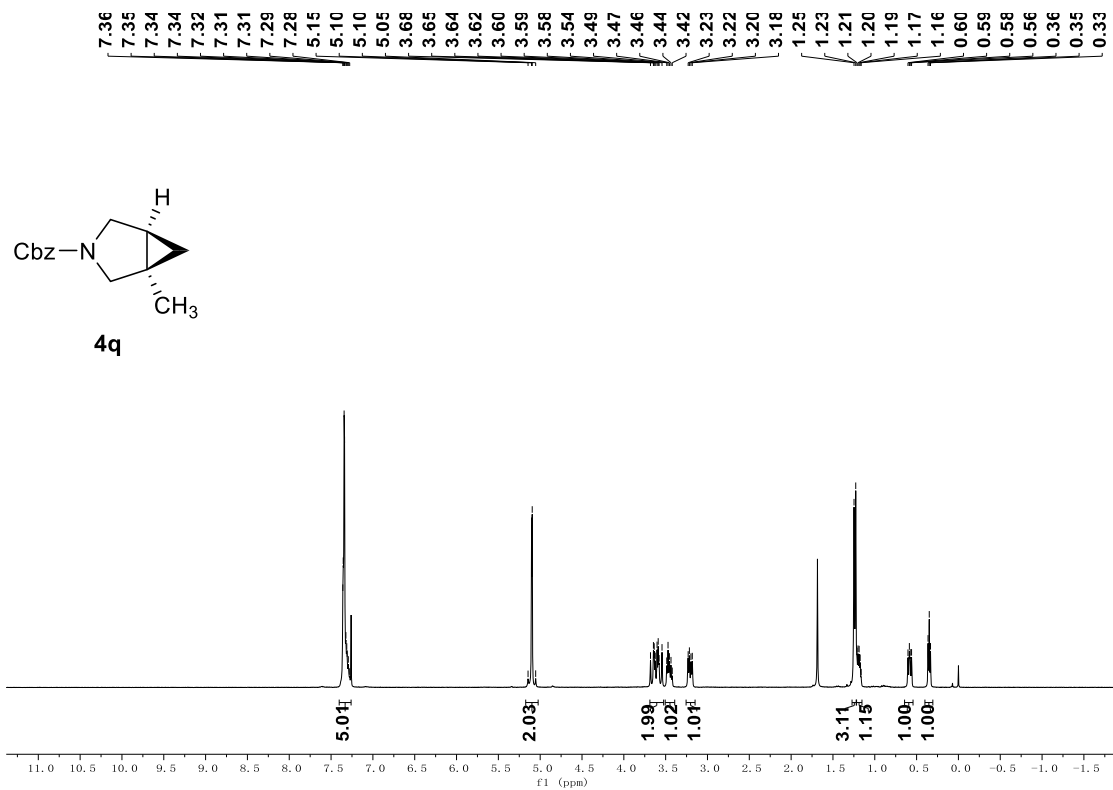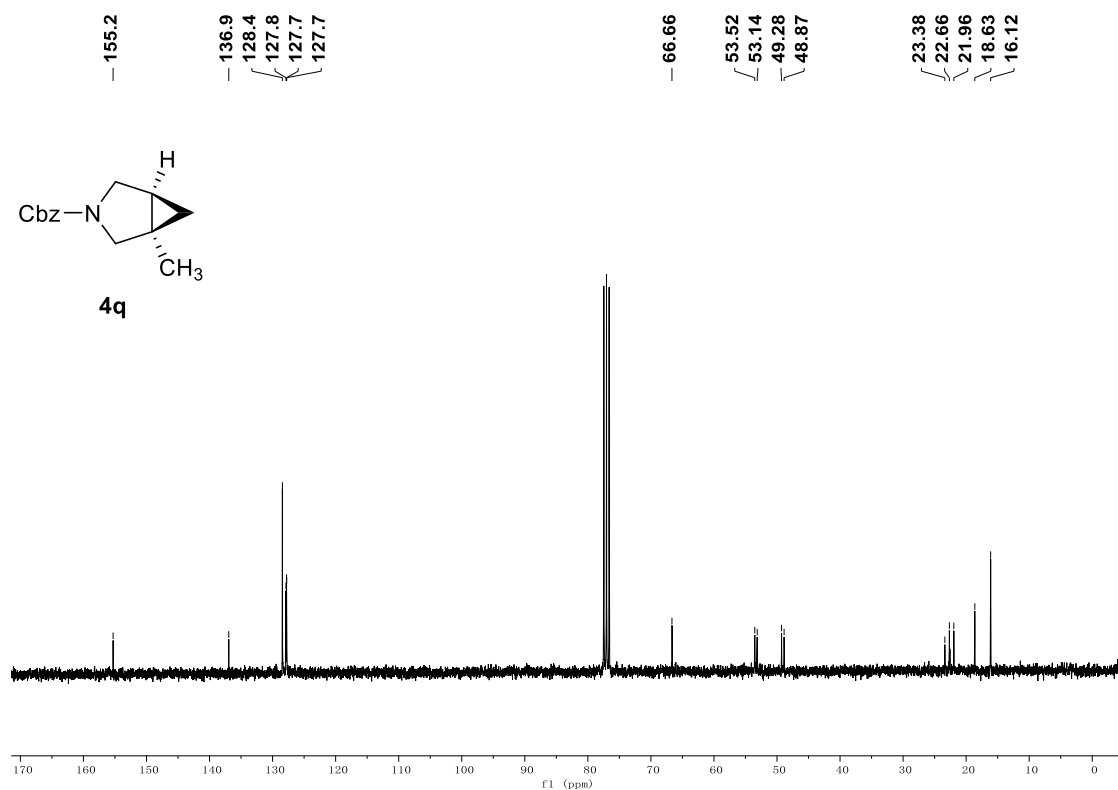



# NMR spectrum for centanafadine and bicifadine

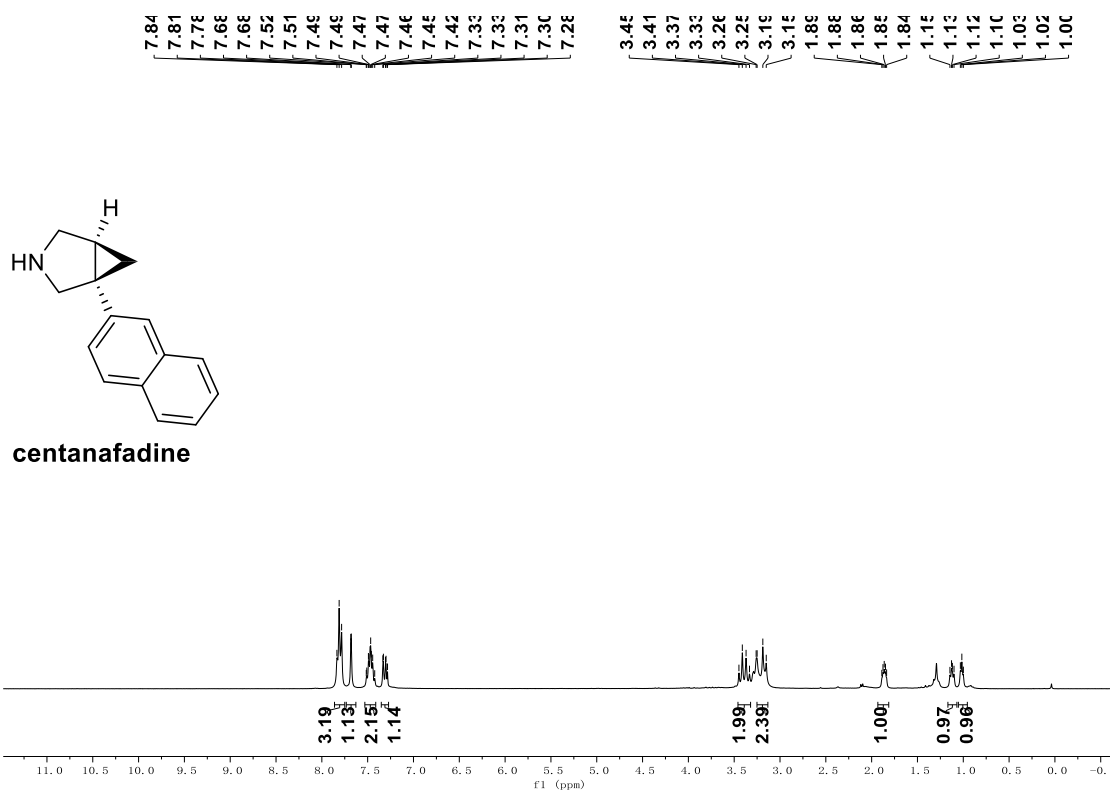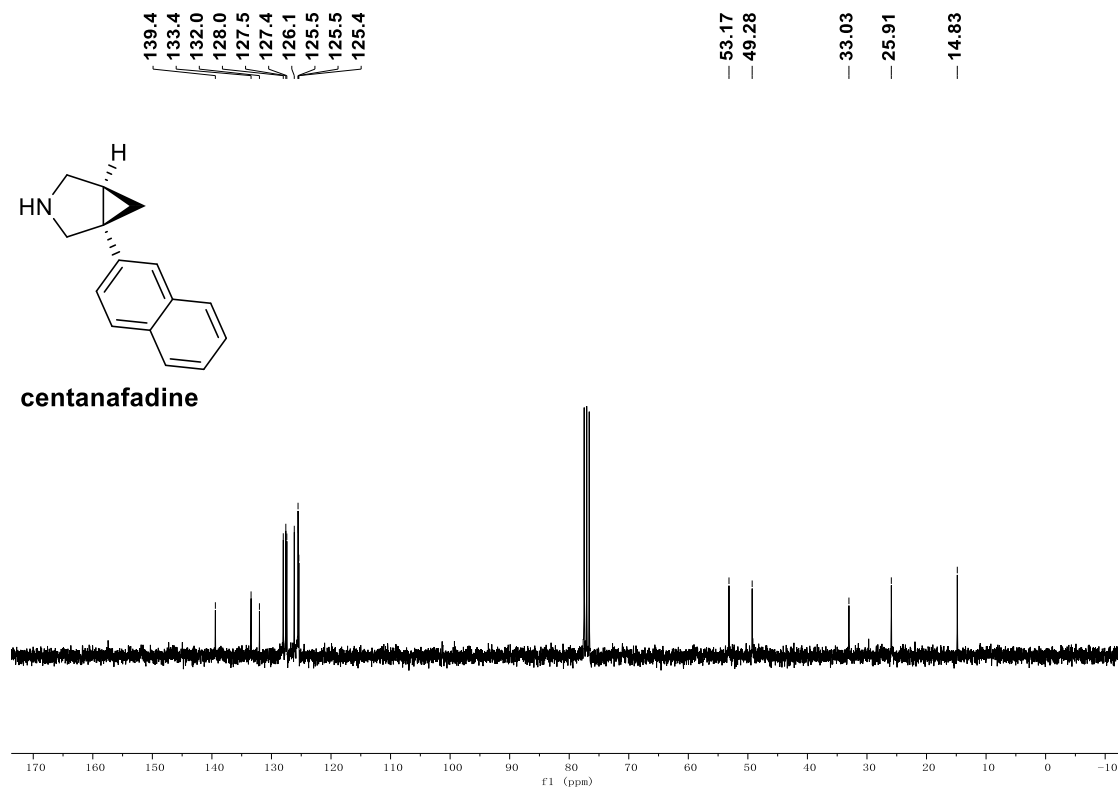

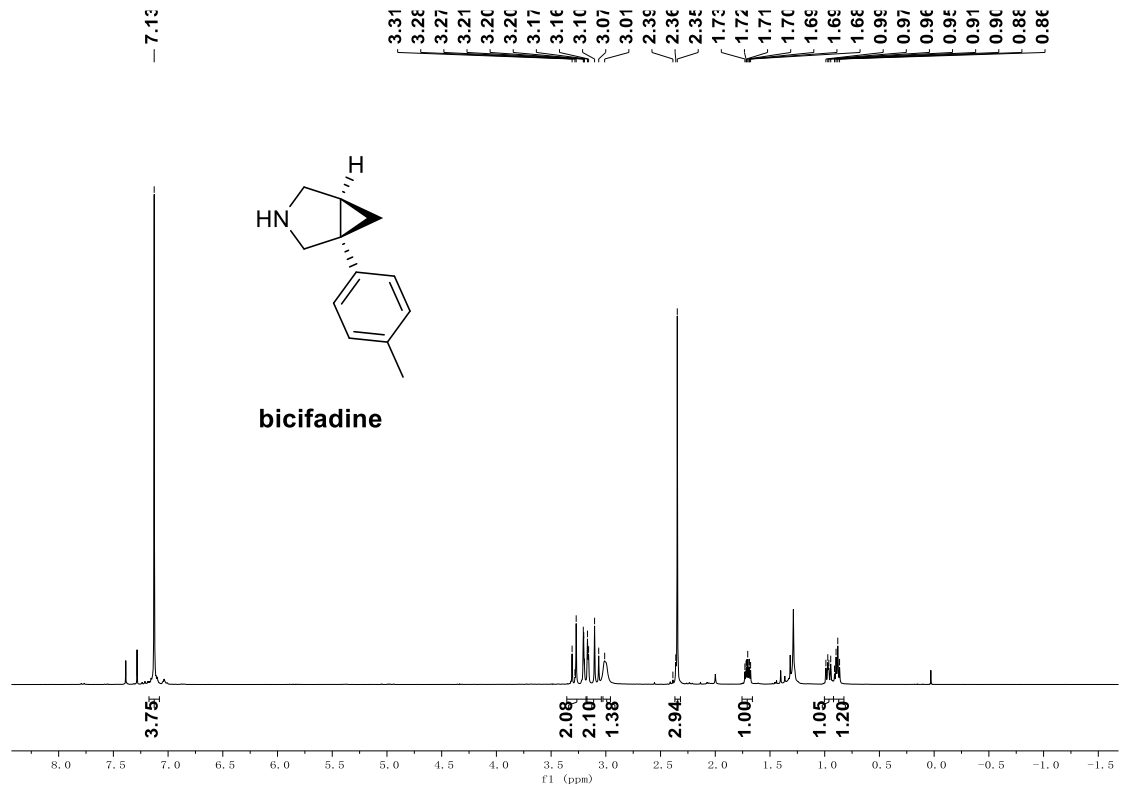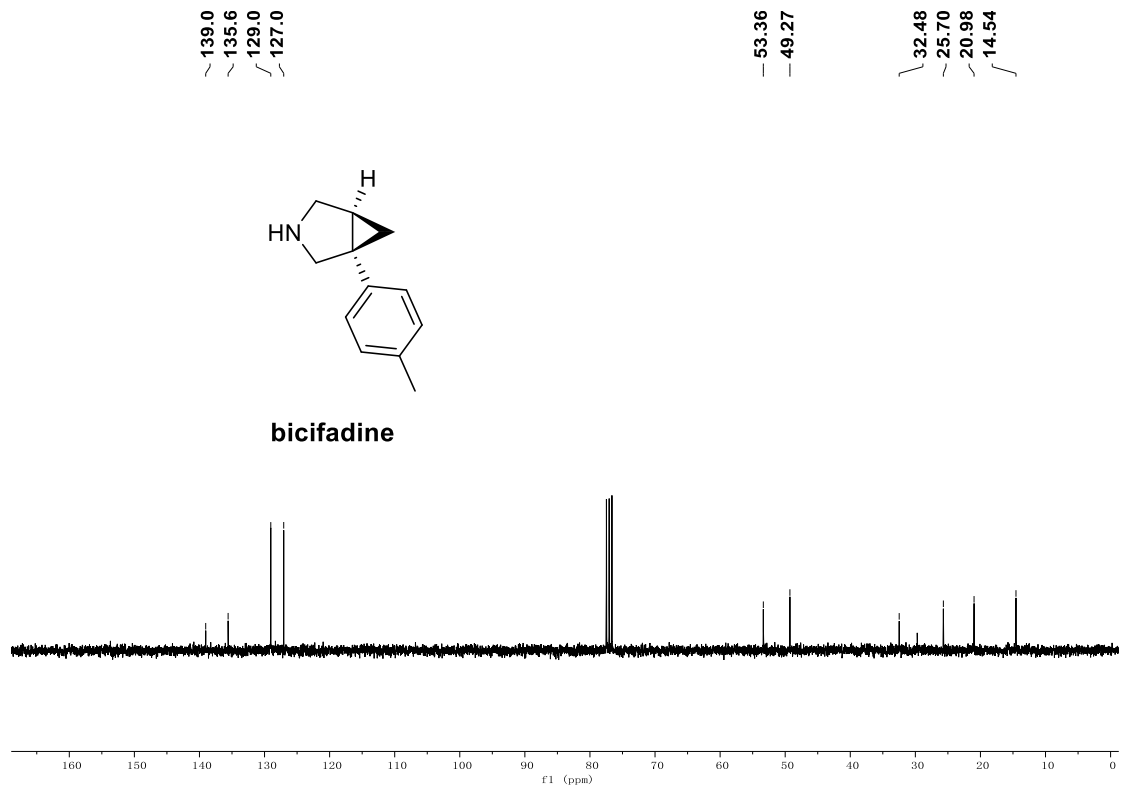

## HPLC spectra of products 4a

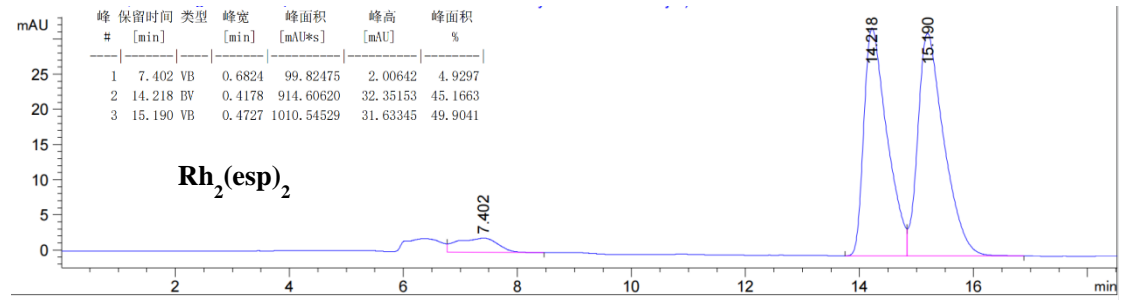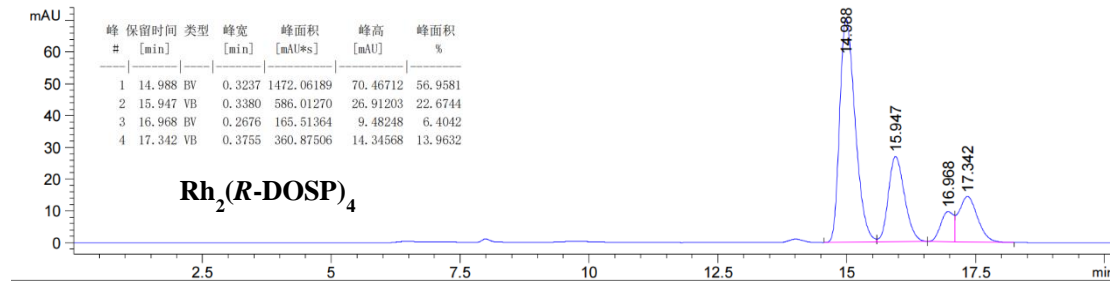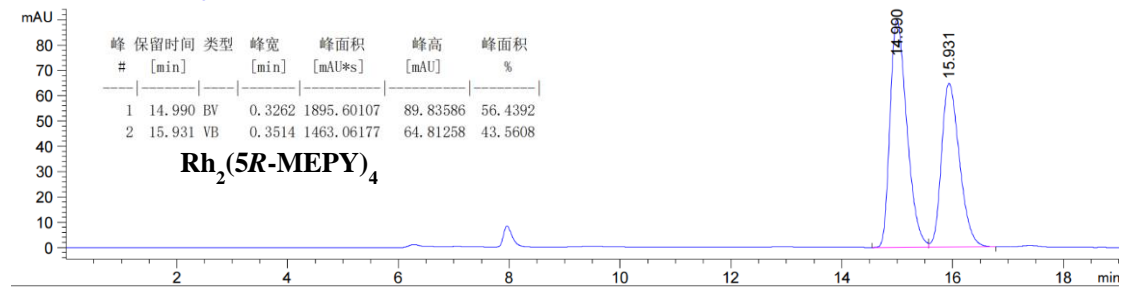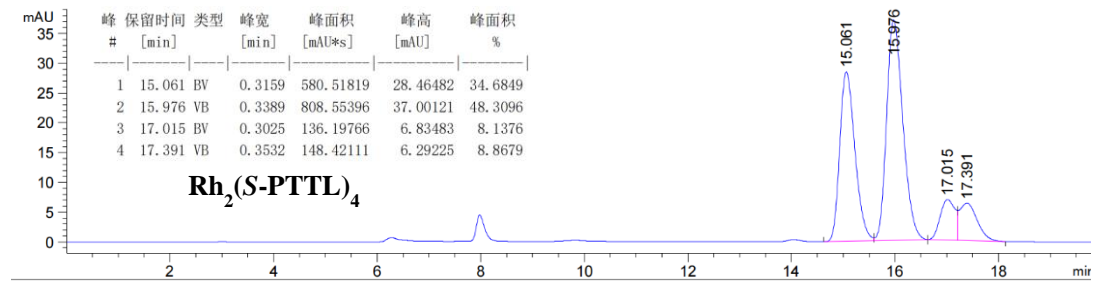

Supplement: d2qo01532c1.pdf [file d2qo01532c1.pdf]
